# Supplementary material for: Palladium-catalyzed alkynylative [5 + 1] carboannulation of 1,3-diarylprop-2-yn-1-yl acetates with terminal alkynes enabled by C–H functionalization
Source: Royal Society of Chemistry journal article supplement (doi:10.1039/d1qo01836a), 2022-01-01
Supplement: d1qo01836a1.pdf [file d1qo01836a1.pdf]

# Supplementary information

## Palladium-Catalyzed Alkynylation [5+1] Carboannulation of 1,3-Diarylprop-2-yn-1-yl acetates with Terminal Alkynes Enabled by C-H Functionalization

Jiang-Xi Yu,<sup>a</sup> Li-Jun Wu,<sup>\*b</sup> Zhi-Qiang Wang,<sup>a</sup> Zhi-Feng Xu,<sup>\*a</sup> and Jin-Heng Li<sup>\*acd</sup>

---

<sup>a.</sup> Key Laboratory of Functional Meta-Organic Compounds of Hunan Province, Key Laboratory of Functional Organometallic Materials (University of Hunan Province), Hengyang Normal University, Hengyang 421008, China. E-mail: [xuzhifeng@163.com](mailto:xuzhifeng@163.com), [jhli@hnu.edu.cn](mailto:jhli@hnu.edu.cn)

<sup>b.</sup> College of Sciences, Central South University of Forestry and Technology, Changsha, 410004, China. E-mail: [lijunwu1105@hnu.edu.cn](mailto:lijunwu1105@hnu.edu.cn)

<sup>c.</sup> Key Laboratory of Jiangxi Province for Persistent Pollutants Control and Resources Recycle, Nanchang Hangkong University, Nanchang 330063, China.

<sup>d.</sup> School of Chemistry and Chemical Engineering, Henan Normal University, Xinxiang, Henan 475004, China.

### List of Contents

(A) Typical Experimental Procedure

(B) Analytical Data

(C) Spectra

(D) References

## (A) General Experimental Procedure

### (a) General Information

All  $^1\text{H}$  and  $^{13}\text{C}$  NMR spectra were recorded on a 400 MHz spectrometer at room temperature in  $\text{CDCl}_3$  with tetramethylsilane as internal standard. High-resolution mass spectra (HRMS) was recorded on an electrospray ionization (ESI) apparatus using time-of-flight (TOF) mass spectrometry. Unless otherwise noted, all reactions were carried out using standard Schlenk techniques, and all starting materials and solvents were commercially available and were used without further purification. Column chromatography was performed on silica gel (300-400 mesh) using petroleum ether (PE)/ethyl acetate (EA). 1-Arylprop-2-yn-1-yl acetates (**1**) were prepared according to reported literatures,<sup>1</sup> and terminal alkynes (**2**) were purchased from commercial sources and used as received.

### (b) Typical Experimental Procedure for the Synthesis of Products **3**:

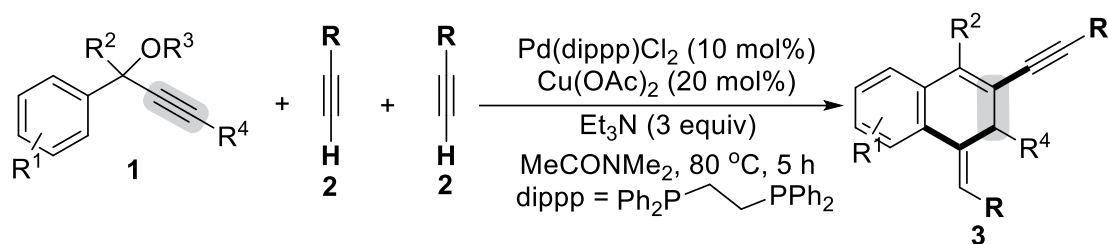

To a Schlenk tube were added **1** (0.2 mmol), alkynes **2** (0.4 mmol),  $\text{Pd}(\text{dipp})\text{Cl}_2$  (10 mol%; 0.02 mmol),  $\text{Cu}(\text{OAc})_2$  (20 mol%; 0.04 mmol),  $\text{Et}_3\text{N}$  (0.6 mmol) and  $\text{MeCONMe}_2$  (DMF; 2 mL). Then the tube was charged with Ar and was stirred at  $80\text{ }^\circ\text{C}$  (oil bar temperature) for 5 h until complete consumption of starting material as monitored by TLC and/or GC-MS analysis. After the reaction was finished, the reaction mixture was cooled to room temperature, quenched by water and extracted with ethyl acetate. The combined organic layer was washed with brine, dried over anhydrous  $\text{Na}_2\text{SO}_4$ , and concentrated in vacuum, the resulting residue was purified by silica gel column chromatography (petroleum ether/ethyl acetate) to afford the desired product **3**.

**(c) The Deuterium-Labeled Experiments:**

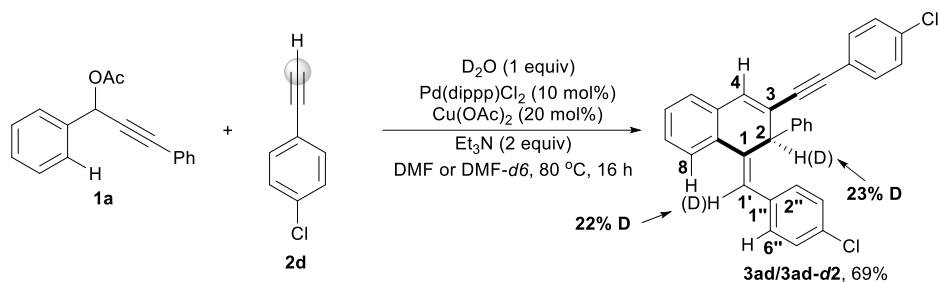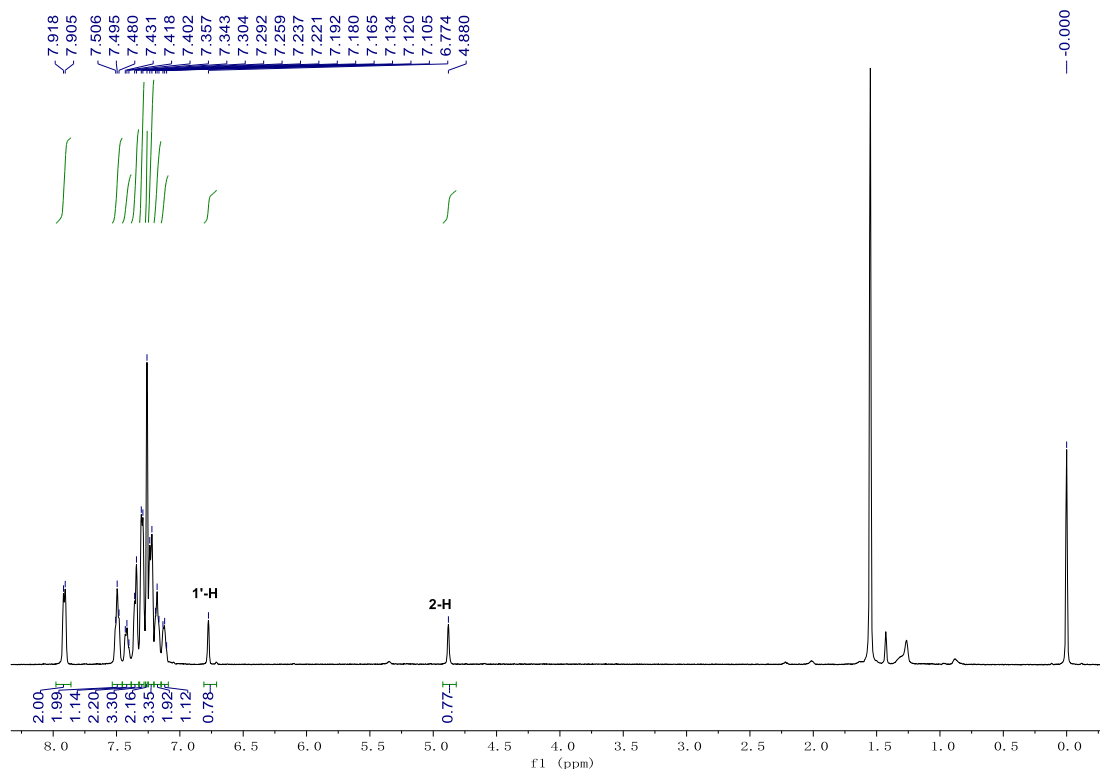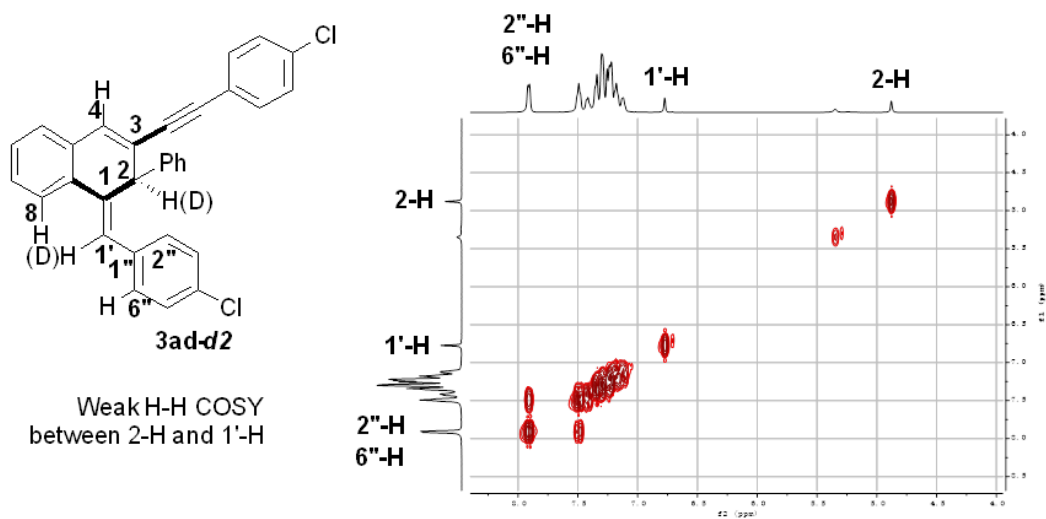

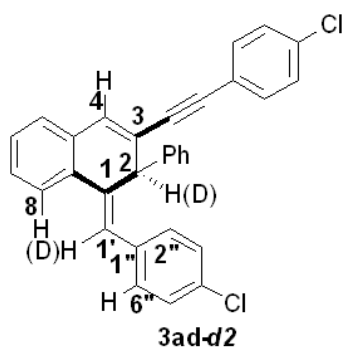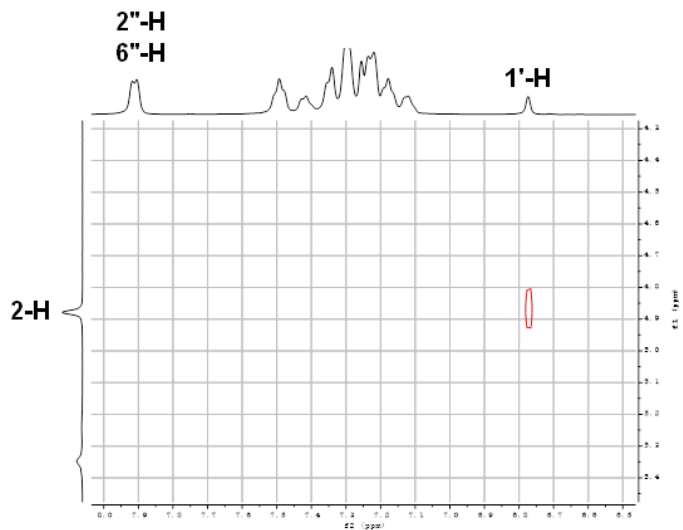

### H-H COSY

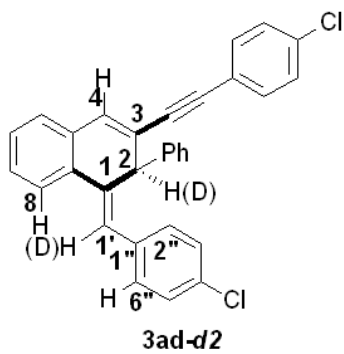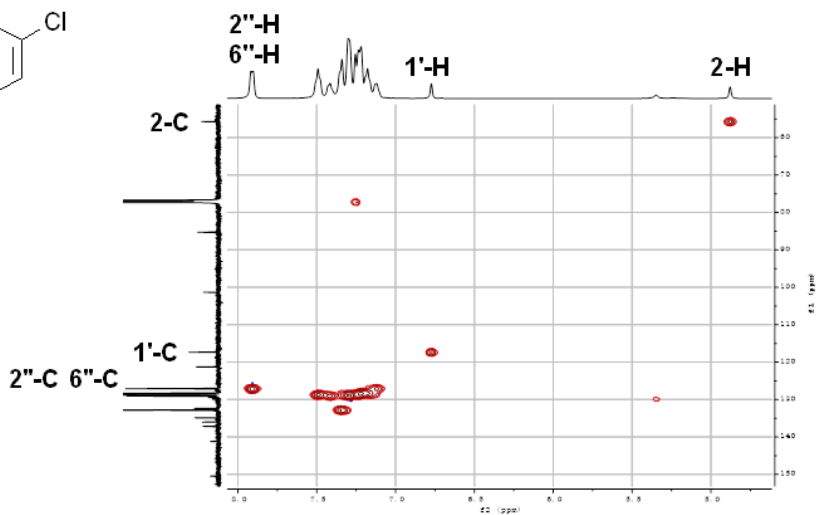

### HSQC

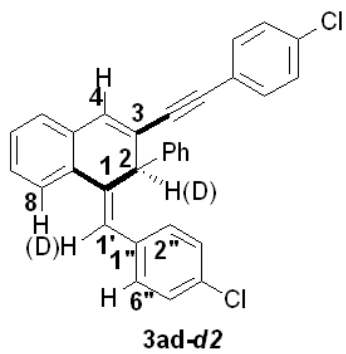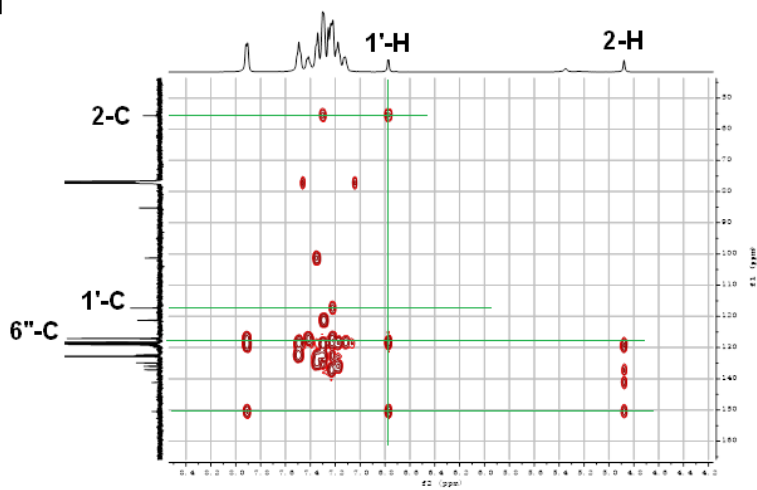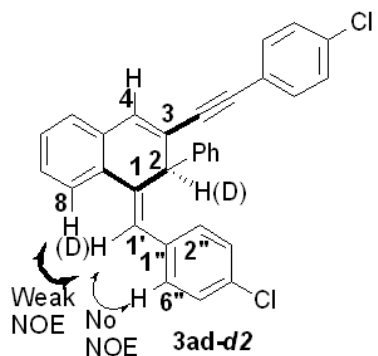

### HMBC

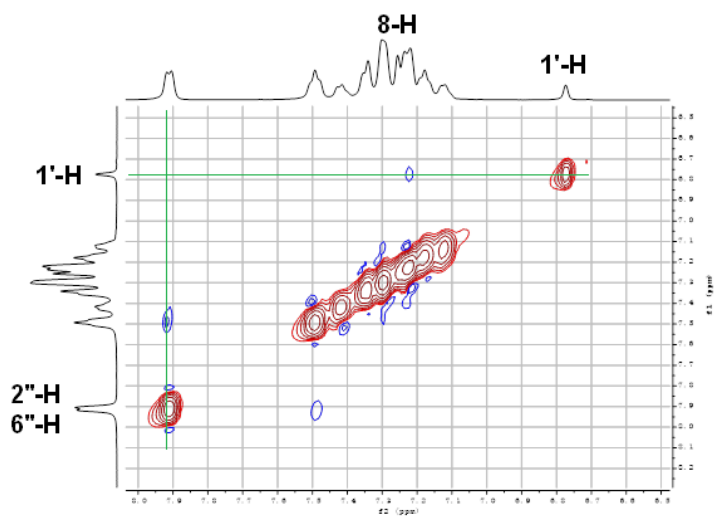

### H-H NOE

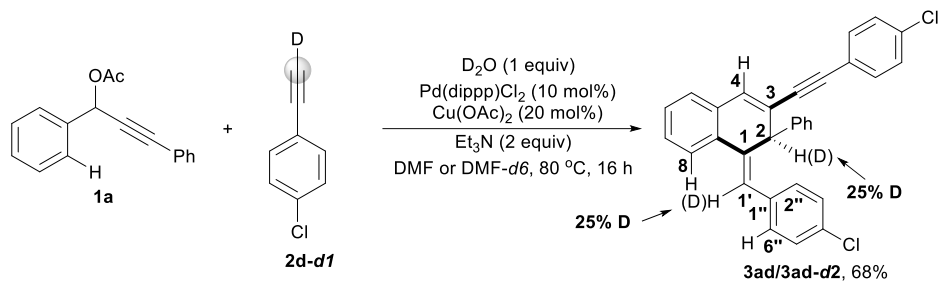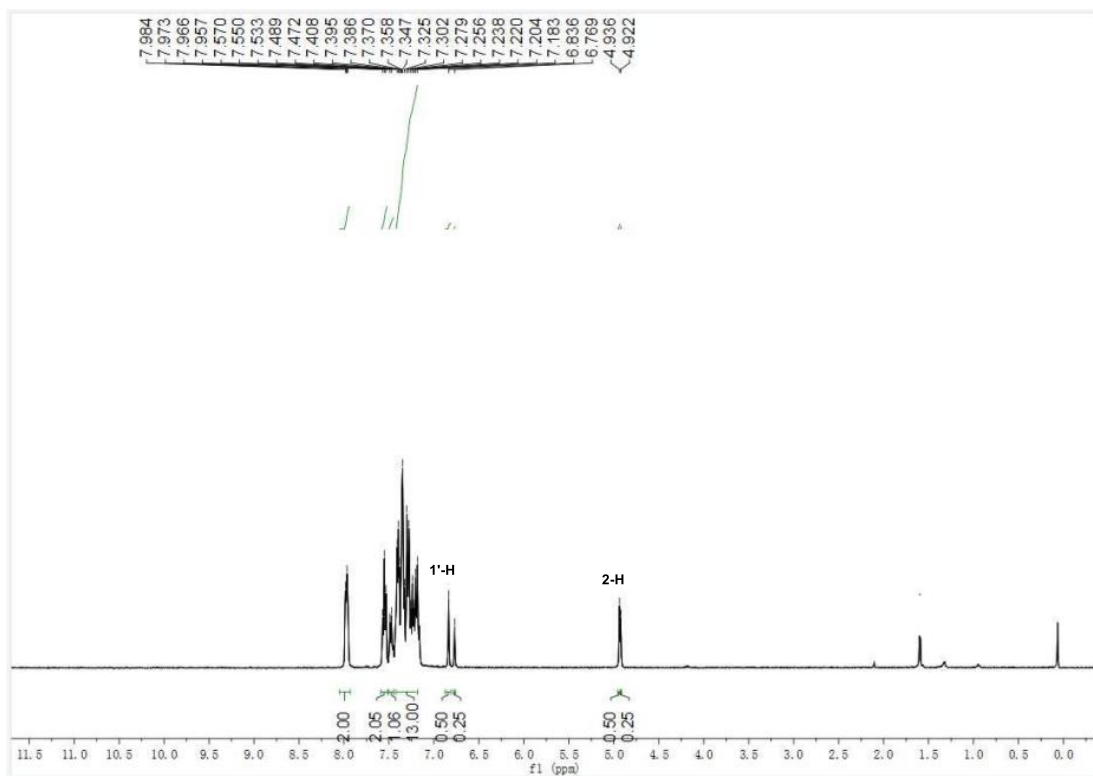

## (B) Analytical Data

### 1-benzylidene-2-phenyl-3-(phenylethynyl)-1,2-dihydronaphthalene (3aa):

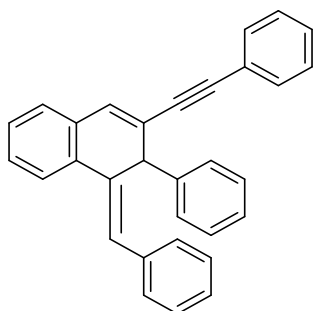

52.0 mg, 66%, *E/Z* > 99:1; Yellow oil; <sup>1</sup>H NMR (400 MHz, CDCl<sub>3</sub>) δ: 7.94 (d, *J* = 7.6 Hz, 2H), 7.46 (t, *J* = 7.6 Hz, 2H), 7.42-7.3 (m, 5H), 7.27-7.23 (m, 7H), 7.18-7.12 (m, 3H), 7.08-7.04 (m, 1H), 6.76 (s, 1H), 4.90 (s, 1H); <sup>13</sup>C NMR (100 MHz, CDCl<sub>3</sub>) δ: 149.8, 141.7, 138.6, 136.3, 132.6, 131.6, 130.4, 128.8, 128.7, 128.6, 128.5, 128.3, 128.3, 128.2, 127.7, 127.1, 126.9, 126.7, 122.9, 116.8, 102.5, 84.6, 56.5; HRMS *m/z* (ESI) calcd for C<sub>31</sub>H<sub>23</sub> ([M+H]<sup>+</sup>) 395.1794, found 395.1799.

### 1-(4-methylbenzylidene)-2-phenyl-3-(p-tolyethynyl)-1,2-dihydronaphthalene (3ab):

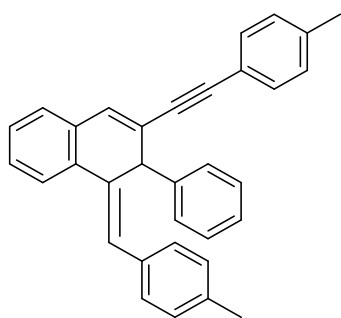

53.2 mg, 63%; *E/Z* = 3:1; Yellow oil; <sup>1</sup>H NMR (400 MHz, CDCl<sub>3</sub>) δ: 7.94 (d, *J* = 7.2 Hz, 2H), 7.47 (t, *J* = 7.2 Hz, 2H), 7.41-7.24 (m, 8H), 7.20-7.07 (m, 5H), 6.96 (d, *J* = 8.0 Hz, 1H), 6.73 (s, 1H), 4.88 (s, 0.75H), 4.87 (s, 0.25H), 2.34 (s, 3H), 2.27 (s, 0.75H), 2.24 (s, 2.25H); <sup>13</sup>C NMR (100 MHz, CDCl<sub>3</sub>) δ: 149.4, 142.1, 140.8, 138.9, 138.9, 136.5, 136.5, 136.3, 135.7, 133.6, 132.8, 132.7, 131.6, 131.5, 130.9, 130.2, 129.2, 129.1, 129.0, 128.7, 128.6, 128.5, 128.3, 128.2, 128.2, 127.8, 127.6, 127.1, 126.9, 126.6, 120.0, 116.5, 116.4, 102.9, 102.7, 84.5, 84.2, 56.5, 56.2, 21.6, 21.1; HRMS *m/z* (ESI) calcd for C<sub>33</sub>H<sub>27</sub> ([M+H]<sup>+</sup>) 423.2107, found 423.2116.

### 1-(4-fluorobenzylidene)-3-((4-fluorophenyl)ethynyl)-2-phenyl-1,2-dihydronaphthalene (3ac):

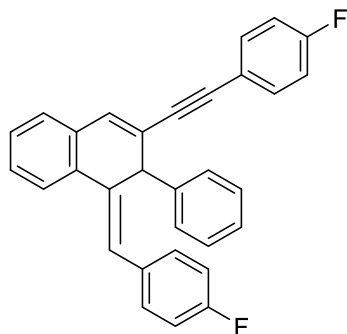

58.5 mg, 68%; *E:Z* = 1:1; Yellow oil; <sup>1</sup>H NMR (400 MHz, CDCl<sub>3</sub>) δ: 7.93-7.90 (m, 2H), 7.48 (m, 2H), 7.41-7.11 (m, 10H), 7.02-6.92 (m, 3H), 6.83 (t, *J* = 8.4 Hz, 1H), 6.76 (s, 0.5H), 6.71 (s, 0.5H), 4.87 (s, 0.5H), 4.85 (s, 0.5H); <sup>19</sup>F NMR (471 MHz, CDCl<sub>3</sub>) δ: -109.6, -109.7, -114.8, -115.7; <sup>13</sup>C NMR (100 MHz, CDCl<sub>3</sub>) δ:

163.6 (d,  $J = 90.2$  Hz), 163.5 (d,  $J = 103$  Hz), 161.1 (d,  $J = 83.8$  Hz), 161.0 (d,  $J = 99.4$  Hz), 149.9, 149.9, 141.7, 141.4, 138.5, 136.1, 134.4, 134.4, 133.7, 133.6, 132.6, 132.5, 132.5, 130.2, 130.1, 129.9, 129.8, 129.3, 129.2, 129.0, 129.0, 128.7, 128.6, 128.4, 128.3, 127.7, 127.2, 127.1, 127.1, 127.0, 119.1, 119.1, 119.0, 117.0, 115.9, 115.9, 115.7, 115.7, 115.5, 115.4, 115.3, 115.1, 101.5, 101.4, 84.3, 84.2, 56.3, 55.7; HRMS  $m/z$  (ESI) calcd for  $C_{31}H_{21}F_2$  ( $[M+H]^+$ ) 431.1606, found 431.1613.

**1-(4-chlorobenzylidene)-3-((4-chlorophenyl)ethynyl)-2-phenyl-1,2-dihydronaphthalene**

**(3ad):**

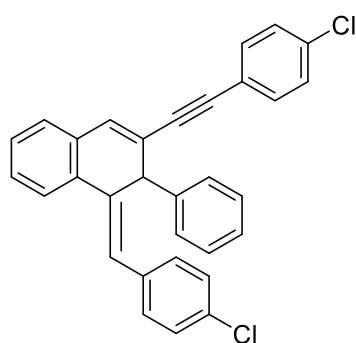

65.6 mg, 71%;  $E/Z = 1:1$ ; Yellow oil;  $^1H$  NMR (400 MHz,  $CDCl_3$ )  $\delta$ : 7.95 (d,  $J = 7.2$  Hz, 2H), 7.53 (t,  $J = 7.2$  Hz, 2H), 7.47-7.45 (m, 1H), 7.39-7.32 (m, 7H), 7.29-7.15 (m, 7H), 6.81 (s, 0.9H), 6.74 (s, 0.1H), 4.92 (s, 0.9H), 4.90 (s, 0.1H);  $^{13}C$  NMR (100 MHz,  $CDCl_3$ )  $\delta$ : 150.4, 150.2, 141.2, 137.2, 136.0, 134.9, 134.7, 133.7, 133.6, 132.8, 132.7, 132.6, 132.4, 129.6, 129.4, 129.1, 129.1, 128.9, 128.8, 128.8, 128.7, 128.7, 128.5, 128.3, 127.7, 127.3, 127.1, 127.1, 127.1, 121.4, 121.3, 117.5, 117.4, 115.8, 101.4, 101.2, 85.4, 85.3, 56.4, 55.7; HRMS  $m/z$  (ESI) calcd for  $C_{31}H_{21}^{35}Cl_2$  ( $[M+H]^+$ ) 463.1015, found 463.1021.

**1-(4-bromobenzylidene)-3-((4-bromophenyl)ethynyl)-2-phenyl-1,2-dihydronaphthalene**

**(3ae):**

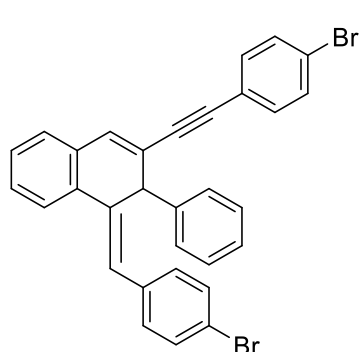

64.7 mg, 59%;  $E/Z = 3:2$ ; Yellow oil;  $^1H$  NMR (400 MHz,  $CDCl_3$ )  $\delta$ : 7.91-7.88 (m, 2H), 7.50-7.33 (m, 7H), 7.27-7.20 (m, 7H), 7.12-7.07 (m, 2H), 6.77 (s, 0.6H), 6.68 (s, 0.4H), 4.85 (s, 1H);  $^{13}C$  NMR (100 MHz,  $CDCl_3$ )  $\delta$ : 150.5, 150.2, 142.4, 141.1, 138.2, 137.6, 136.0, 135.1, 133.0, 132.3, 131.7, 131.6, 131.3, 130.3, 129.7, 129.4, 129.1, 129.0, 128.7, 128.6, 128.3, 128.3, 127.6, 127.2, 127.1, 127.1, 123.2, 123.1, 121.7, 121.7, 120.8, 120.8, 117.4, 115.8, 101.6, 101.4, 85.6, 85.4, 56.3, 55.7; HRMS  $m/z$  (ESI) calcd for  $C_{31}H_{21}^{79}Br_2$  ( $[M+H]^+$ ) 549.9932, found 549.9937.



**2-phenyl-1-(4-(trifluoromethyl)benzylidene)-3-((4-(trifluoromethyl)phenyl)ethynyl)-1,2-dihydronaphthalene (3af):**

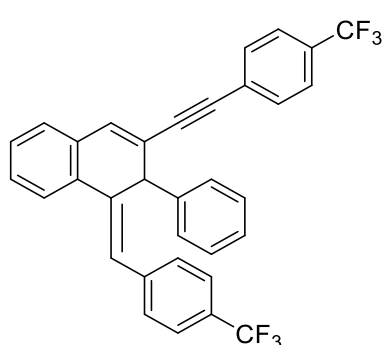

55.1 mg, 52%; *E/Z* = 3:2; Yellow oil; <sup>1</sup>H NMR (400 MHz, CDCl<sub>3</sub>) δ: 7.94-7.90 (m, 2H), 7.58-7.49 (m, 8H), 7.45-7.36 (m, 3H), 7.33-7.28 (m, 2H), 7.25-7.16 (m, 3H), 6.83 (s, 0.55H), 6.79 (s, 0.45H), 4.98 (s, 0.55H), 4.91 (s, 0.55H); <sup>19</sup>F NMR (471 MHz, CDCl<sub>3</sub>) δ: -62.7, -63.0; <sup>13</sup>C NMR (100 MHz, CDCl<sub>3</sub>) δ: 151.5, 151.0, 144.0, 142.6, 140.5, 139.5, 138.0, 135.8, 132.1, 132.1, 131.9, 131.8, 130.7, 130.4 (d, *J* = 32.5 Hz), 129.3 (d, *J* = 32.1 Hz), 129.4, 129.3, 128.8, 128.7, 128.6, 128.4, 128.3, 128.3, 128.0, 127.6, 127.4, 127.3, 127.2, 127.1, 126.4, 125.6 (q, *J* = 3.7 Hz), 125.3 (q, *J* = 3.6 Hz), 125.2 (q, *J* = 3.7 Hz), 122.6 (d, *J* = 4.3 Hz), 118.1, 116.0, 101.3, 100.8, 86.4, 86.3, 56.5, 55.9; HRMS *m/z* (ESI) calcd for C<sub>33</sub>H<sub>21</sub>F<sub>6</sub> ([M+H]<sup>+</sup>) 531.1542, found 531.1540.

**1-(3-methylbenzylidene)-2-phenyl-3-(*m*-tolylethynyl)-1,2-dihydronaphthalene (3ag):**

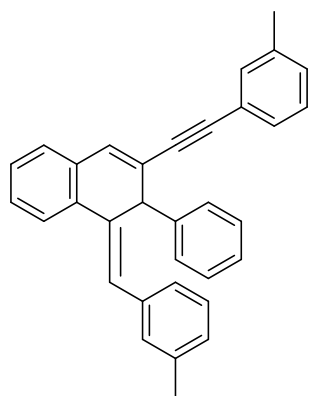

42.2 mg, 50%; *E/Z* = 1:1; Yellow oil; <sup>1</sup>H NMR (400 MHz, CDCl<sub>3</sub>) δ: 7.95 (d, *J* = 7.6 Hz, 2H), 7.48 (t, *J* = 7.6 Hz, 2H), 7.38 (t, *J* = 7.2 Hz, 2H), 7.29-6.98 (m, 12H), 6.75 (s, 0.5H), 6.72 (s, 0.5H), 4.89 (s, 0.5H), 4.86 (s, 0.5H), 2.30 (s, 3H), 2.27 (s, 1.5H), 2.19 (s, 1.5H); <sup>13</sup>C NMR (100 MHz, CDCl<sub>3</sub>) δ: 149.8, 149.6, 141.9, 141.8, 138.9, 138.6, 138.0, 137.9, 137.6, 136.4, 136.2, 132.7, 132.1, 132.1, 130.6, 130.3, 129.6, 129.1, 128.8, 128.7, 128.6, 128.4, 128.4, 128.3, 128.3, 128.2, 128.1, 127.8, 127.7, 127.5, 127.1, 126.9, 126.7, 125.4, 124.9, 122.8, 122.8, 116.7, 116.7, 102.8, 102.6, 84.4, 84.4, 56.6, 56.5, 21.5, 21.3, 21.2; HRMS *m/z* (ESI) calcd for C<sub>33</sub>H<sub>21</sub>F<sub>6</sub> ([M+H]<sup>+</sup>) 423.2107, found 423.2112.

### 1-(2-chlorobenzylidene)-3-((2-chlorophenyl)ethynyl)-2-phenyl-1,2-dihydronaphthalene

(3ah):

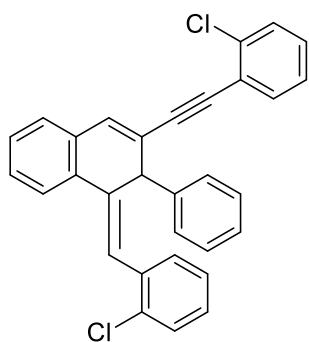

38.8 mg, 42%; *E/Z* = 3:2; Yellow oil;  $^1\text{H}$  NMR (400 MHz,  $\text{CDCl}_3$ )  $\delta$ : 8.06-8.03 (m, 2H), 7.50-7.37 (m, 6H), 7.32-7.18 (m, 9H), 7.12-6.97 (m, 2H), 5.54 (s, 0.4H), 4.93 (s, 0.6H);  $^{13}\text{C}$  NMR (100 MHz,  $\text{CDCl}_3$ )  $\delta$ : 150.5, 150.4, 143.5, 140.6, 138.1, 136.0, 136.0, 134.2, 134.0, 133.4, 133.3, 133.3, 132.3, 132.2, 130.4, 129.7, 129.6, 129.6, 129.4, 129.3, 129.3, 129.2, 129.1, 129.1, 128.6, 128.6, 128.5, 128.4, 128.3, 128.3, 128.2, 127.9, 127.7, 127.2, 127.2, 127.0, 127.0, 126.4, 126.2, 123.0, 122.8, 117.5, 113.3, 99.7, 99.5, 89.5, 89.4, 56.0, 52.8; HRMS *m/z* (ESI) calcd for  $\text{C}_{33}\text{H}_{21}^{35}\text{Cl}_2$  ( $[\text{M}+\text{H}]^+$ ) 463.1015, found 463.1017.

### 2-((2-phenyl-3-(thiophen-2-ylethynyl)naphthalen-1-yl)methyl)thiophene (3ai):

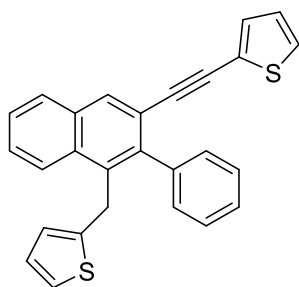

56.0 mg, 69%; Yellow oil;  $^1\text{H}$  NMR (400 MHz,  $\text{CDCl}_3$ )  $\delta$ : 8.04 (s, 1H), 7.42 (d, *J* = 5.6 Hz, 1H), 7.35-7.22 (m, 6H), 7.17-7.09 (m, 4H), 6.93 (d, *J* = 7.2 Hz, 2H), 6.86 (s, 2H), 4.20 (s, 2H);  $^{13}\text{C}$  NMR (100 MHz,  $\text{CDCl}_3$ )  $\delta$ : 140.7, 140.5, 139.7, 139.6, 138.9, 132.8, 131.3, 130.1, 128.3, 128.2, 128.0, 127.8, 127.2, 127.0, 126.9, 125.8, 123.9, 123.5, 123.4, 120.0, 93.7, 86.3, 37.1. HRMS *m/z* (ESI) calcd for  $\text{C}_{27}\text{H}_{19}\text{S}_2$  ( $[\text{M}+\text{H}]^+$ ) 407.0923, found 407.0925.

### 3-((2-phenyl-3-(thiophen-3-ylethynyl)naphthalen-1-yl)methyl)thiophene (3aj):

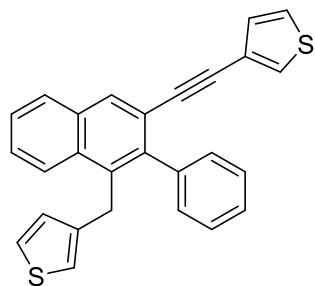

56.8 mg, 70%; Yellow oil;  $^1\text{H}$  NMR (400 MHz,  $\text{CDCl}_3$ )  $\delta$ : 7.99 (s, 1H), 7.35-7.28 (m, 8H), 7.16-7.07 (m, 4H), 6.98 (d, *J* = 6.8 Hz, 2H), 7.75 (d, *J* = 4.8 Hz, 1H), 4.15 (s, 2H);  $^{13}\text{C}$  NMR (100 MHz,  $\text{CDCl}_3$ )  $\delta$ : 141.1, 140.1, 139.7, 139.1, 138.7, 132.4, 130.2, 129.6, 128.5, 128.1, 127.9, 127.7, 127.4, 127.1, 126.0, 125.1, 125.0, 123.9, 122.5, 120.5, 89.4, 87.6, 38.7; HRMS *m/z* (ESI) calcd for  $\text{C}_{27}\text{H}_{19}\text{S}_2$  ( $[\text{M}+\text{H}]^+$ ) 407.0923, found 407.0929.

**1-(4-chlorobenzylidene)-3-((4-chlorophenyl)ethynyl)-7-methyl-2-phenyl-1,2-dihydronaphthalene (3bd):**

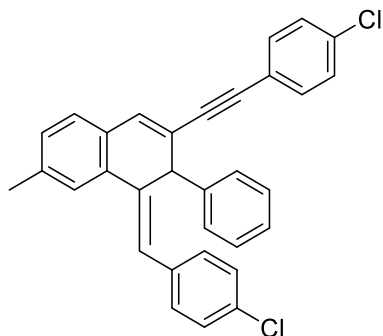

66.6 mg, 70%; *E/Z* = 2:1; Yellow oil; <sup>1</sup>H NMR (500 MHz, CDCl<sub>3</sub>) δ: 7.92-7.89 (m, 2H), 7.48 (t, *J* = 7.5 Hz, 2H), 7.45-7.39 (m, 2H), 7.35-7.23 (m, 7H), 7.11 (d, *J* = 8.5 Hz, 2H), 6.75 (s, 0.66H), 6.69 (s, 0.34H), 4.86 (s, 0.66H), 4.83 (s, 0.64H), 2.29 (s, 1H), 2.26 (s, 2H); <sup>13</sup>C NMR (125 MHz, CDCl<sub>3</sub>) δ: 150.5, 150.1, 142.5, 140.2, 137.3, 137.0, 136.7, 135.2, 134.8, 133.2, 132.8, 132.8, 132.6, 132.4, 131.5, 129.4, 129.4, 129.1, 129.0, 129.0, 128.8, 128.7, 128.7, 128.7, 128.4, 128.2, 127.5, 127.1, 127.0, 121.3, 117.3, 115.6, 101.6, 101.1, 85.5, 85.4, 56.0, 55.7, 21.2; HRMS *m/z* (ESI) calcd for C<sub>32</sub>H<sub>23</sub><sup>35</sup>Cl<sub>2</sub> ([M+H]<sup>+</sup>) 477.1171, found 477.1177.

**7-(*tert*-butyl)-1-(4-chlorobenzylidene)-3-((4-chlorophenyl)ethynyl)-2-phenyl-1,2-dihydronaphthalene (3cd):**

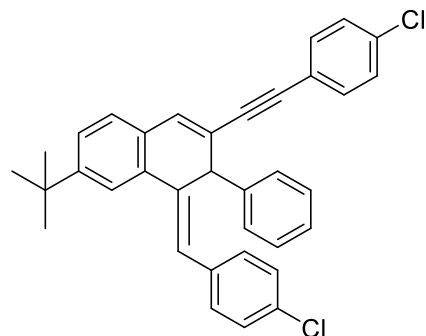

74.6 mg, 72%; *E/Z* > 99:1; Yellow oil; <sup>1</sup>H NMR (500 MHz, CDCl<sub>3</sub>) δ: 7.90 (d, *J* = 7.5 Hz, 2H), 7.47-7.16 (m, 15H), 6.75 (s, 1H), 4.84 (s, 1H), 1.26 (s, 9H); <sup>13</sup>C NMR (125 MHz, CDCl<sub>3</sub>) δ: 150.6, 150.2, 140.3, 137.5, 134.8, 133.2, 132.8, 132.6, 132.4, 129.1, 128.8, 128.7, 128.7, 128.1, 127.1, 125.4, 121.3, 117.3, 101.1, 85.4, 55.7, 34.5, 31.2; HRMS *m/z* (ESI) calcd for C<sub>35</sub>H<sub>29</sub><sup>35</sup>Cl<sub>2</sub> ([M+H]<sup>+</sup>) 519.1641, found 519.1644.

**1-(4-chlorobenzylidene)-3-((4-chlorophenyl)ethynyl)-7-fluoro-2-phenyl-1,2-dihydronaphthalene (3dd):**

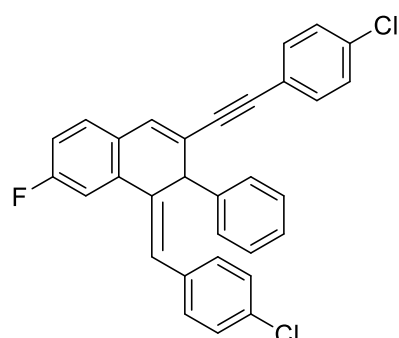

62.4 mg, 65%; *E/Z* = 1.5:1; Yellow oil; <sup>1</sup>H NMR (400 MHz, CDCl<sub>3</sub>) δ: 6.97 (d, *J* = 7.2 Hz, 2H), 7.57-7.46 (m, 3H), 7.42-7.29 (m, 7H), 7.26-7.20 (m, 3H), 7.03 (t, *J* = 8.0 Hz, 1H), 6.93 (t, *J* = 8.0 Hz, 1H), 6.80 (s, 0.6H), 6.78 (s, 0.4H), 4.90 (s, 1H); <sup>19</sup>F NMR

(471 MHz, CDCl<sub>3</sub>)  $\delta$ : -114.3, -115.2; <sup>13</sup>C NMR (100 MHz, CDCl<sub>3</sub>)  $\delta$ : 162.0 (d,  $J$  = 243.8 Hz), 161.8 (d,  $J$  = 246.4 Hz), 150.2, 150.1, 142.2, 140.8 (d,  $J$  = 2.3 Hz), 136.9, 134.9, 134.8, 134.5, 133.9 (d,  $J$  = 3.0 Hz), 132.8, 132.7, 132.3, 132.2, 132.1 (d,  $J$  = 3.2 Hz), 129.8, 129.7, 129.5, 129.4, 129.2, 129.1, 129.0, 128.9, 128.8, 128.7, 128.7, 128.6, 128.4, 127.0, 121.2, 116.0, 115.7 (d,  $J$  = 20.0 Hz), 115.4, 115.2, 101.6, 101.4, 85.2, 85.1, 55.5; HRMS  $m/z$  (ESI) calcd for C<sub>31</sub>H<sub>20</sub><sup>35</sup>Cl<sub>2</sub>F ([M+H]<sup>+</sup>) 481.0921, found 481.0934.

**7-chloro-1-(4-chlorobenzylidene)-3-((4-chlorophenyl)ethynyl)-2-phenyl-1,2-dihydronaphthalene (3ed):**

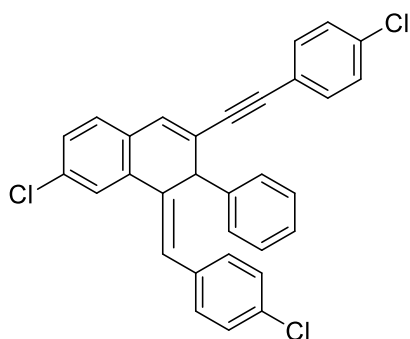

67.5 mg, 65%;  $E/Z$  > 99:1; Yellow oil; <sup>1</sup>H NMR (500 MHz, CDCl<sub>3</sub>)  $\delta$ : 7.89 (d,  $J$  = 7.0 Hz, 2H), 7.48 (t,  $J$  = 8.0 Hz, 2H), 7.44-7.39 (m, 1H), 7.34-7.12 (m, 12H), 6.70 (s, 1H), 4.82 (s, 1H); <sup>13</sup>C NMR (125 MHz, CDCl<sub>3</sub>)  $\delta$ : 150.2, 141.8, 136.8, 135.0, 134.4, 133.7, 132.9, 132.8, 132.8, 132.2, 129.8, 129.4, 129.2, 129.0, 128.8, 128.8, 128.7, 128.5, 127.1, 121.1, 116.0, 101.7, 85.1, 55.6; HRMS  $m/z$  (ESI) calcd for C<sub>31</sub>H<sub>20</sub><sup>35</sup>Cl<sub>3</sub> ([M+H]<sup>+</sup>) 497.0625, found 497.0639.

**1-(4-chlorobenzylidene)-3-((4-chlorophenyl)ethynyl)-2-phenyl-7-(trifluoromethyl)-1,2-dihydronaphthalene (3fd):**

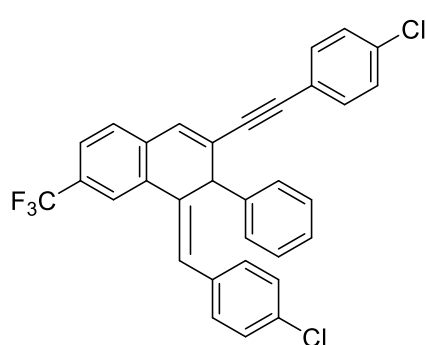

72 mg, 68%;  $E/Z$  > 3:2; Yellow oil; <sup>1</sup>H NMR (500 MHz, CDCl<sub>3</sub>)  $\delta$ : 7.90 (d,  $J$  = 7.5 Hz, 2H), 7.54-7.49 (m, 3H), 7.46-7.41 (m, 3H), 7.36-7.24 (m, 8H), 7.13 (s, 1H), 6.78 (s, 0.6H), 6.75 (s, 0.4H), 4.92 (s, 0.4H), 4.87 (s, 0.6H); <sup>19</sup>F NMR (471 MHz, CDCl<sub>3</sub>)  $\delta$ : -62.4, -62.5; <sup>13</sup>C NMR (125 MHz, CDCl<sub>3</sub>)  $\delta$ : 150.4, 150.1, 143.6, 142.4, 141.2, 139.4, 136.7, 135.5, 135.2, 134.7 (d,  $J$  = 90.3 Hz), 133.7, 133.1, 132.9, 132.9, 132.8, 132.1, 132.0, 130.8, 128.9 (q,  $J$  = 32.1 Hz), 129.3, 129.3, 129.0, 128.9, 128.8, 128.8, 128.8, 128.6, 128.2, 127.9, 127.1, 127.0, 125.7 (q,  $J$  = 3.6 Hz), 125.2 (q,  $J$  = 3.6 Hz), 123.1 (q,  $J$  = 4.5 Hz), 121.0, 120.9,

120.1, 116.3, 115.7, 102.2, 101.8, 84.9, 84.9, 55.8, 55.7; HRMS  $m/z$  (ESI) calcd for  $C_{32}H_{20}^{35}Cl_2F_3([M+H]^+)$  531.0889, found 531.0895.

**7-phenyl-6-(thiophen-3-ylethynyl)-8-(thiophen-3-ylmethyl)naphthalen-2-yl**

**(3r,5r,7r)-adamantane-1-carboxylate (3gj):**

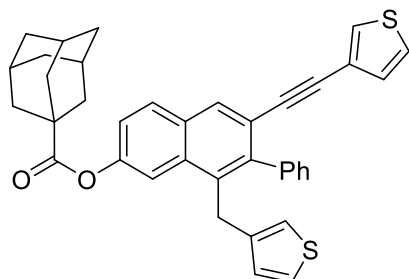

81.8 mg, 70%; Yellow oil;  $^1H$  NMR (500 MHz,  $CDCl_3$ )  $\delta$ : 8.00 (s, 1H), 7.42-7.28 (m, 4H), 7.33 (d,  $J = 10.5$  Hz, 2H), 7.30-7.28 (m, 2H), 7.16-7.15 (m, 1H), 7.09-7.08 (m, 1H), 6.97 (d,  $J = 8.0$  Hz, 2H), 6.84 (d,  $J = 8.5$  Hz, 2H), 6.76 (d,  $J = 5.0$  Hz, 2H),

4.14 (s, 2H), 2.05-2.01 (m, 9H), 1.77-1.71 (m, 6H);  $^{13}C$  NMR (125 MHz,  $CDCl_3$ )  $\delta$ : 176.2, 149.3, 141.0, 140.2, 139.6, 138.8, 136.3, 132.2, 130.1, 129.6, 129.3, 127.9, 127.8, 127.5, 127.2, 125.2, 125.0, 124.0, 122.5, 121.2, 120.6, 89.3, 87.6, 40.9, 38.7, 38.1, 36.4, 27.9; HRMS  $m/z$  (ESI) calcd for  $C_{38}H_{33}O_2S_2$  ( $[M+H]^+$ ) 585.1916, found 585.1918.

**5-chloro-1-(4-chlorobenzylidene)-3-((4-chlorophenyl)ethynyl)-2-phenyl-1,2-dihydronaphthalene (3hd):**

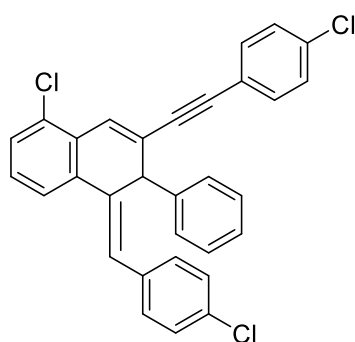

64.5 mg, 65%;  $E/Z = 4:1$ ; Yellow oil;  $^1H$  NMR (500 MHz,  $CDCl_3$ )  $\delta$ : 8.01 (d,  $J = 7.0$  Hz, 1.6H), 7.97 (d,  $J = 7.5$  Hz, 0.4H), 7.58-7.54 (m, 2H), 7.50-7.32 (m, 8H), 7.29-7.24 (m, 3H), 7.18-7.05 (m, 2.8H), 6.80 (s, 0.2H), 5.52 (s, 0.2H), 4.91 (s, 0.8H);  $^{13}C$  NMR (125 MHz,  $CDCl_3$ )  $\delta$ : 150.3, 145.0, 143.2, 141.2, 136.7, 135.6,

135.0, 134.9, 134.5, 134.1, 133.8, 133.7, 133.5, 132.8, 132.8, 132.7, 132.7, 132.3, 132.2, 130.1, 130.0, 129.5, 129.2, 129.2, 129.1, 129.0, 128.9, 128.8, 128.7, 128.6, 128.5, 128.4, 128.1, 127.3, 127.1, 127.0, 126.2, 121.3, 121.1, 115.9, 113.4, 101.8, 101.7, 85.40, 85.2, 55.3, 52.6; HRMS  $m/z$  (ESI) calcd for  $C_{31}H_{20}^{35}Cl_3$  ( $[M+H]^+$ ) 497.0625, found 497.0628.

**1-(4-chlorobenzylidene)-3-((4-chlorophenyl)ethynyl)-2-(p-tolyl)-1,2-dihydronaphthalene**

**(3id):**

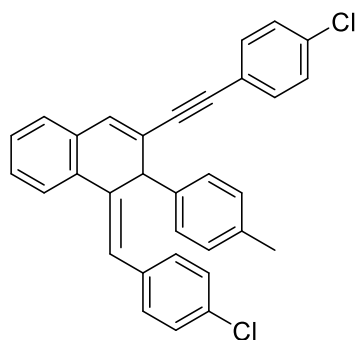

71.4 mg, 75%; *E/Z* = 2.3:1; Yellow oil; <sup>1</sup>H NMR (500 MHz, CDCl<sub>3</sub>) δ: 7.81 (d, *J* = 7.0 Hz, 2H), 7.33-7.10 (m, 15H), 6.75 (s, 0.7H), 6.68 (s, 0.3H), 4.85 (s, 0.7H), 4.83 (s, 0.3H), 2.41 (s, 3H); <sup>13</sup>C NMR (125 MHz, CDCl<sub>3</sub>) δ: 150.5, 150.2, 142.4, 141.4, 139.3, 139.2, 138.4, 137.3, 136.0, 134.8, 134.7, 133.6, 132.8, 132.6, 132.5, 129.6, 129.4, 129.1, 128.9, 128.7, 128.7, 128.6, 128.6, 128.4, 128.3, 127.7, 127.2, 127.0, 127.0, 126.9, 121.4, 121.3, 117.2, 115.7, 101.3, 101.1, 85.6, 85.5, 75.6, 56.2, 55.6, 22.6, 21.5; HRMS *m/z* (ESI) calcd for C<sub>32</sub>H<sub>23</sub><sup>35</sup>Cl<sub>2</sub> ([M+H]<sup>+</sup>) 477.1171, found 477.1183.

**1-(4-chlorobenzylidene)-3-((4-chlorophenyl)ethynyl)-2-(4-methoxyphenyl)-1,2-dihydronaphthalene (3jd):**

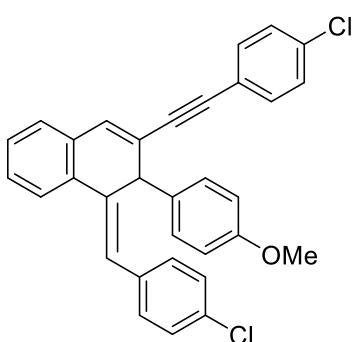

68.9 mg, 70%; *E/Z* = 9:1; Yellow oil; <sup>1</sup>H NMR (400 MHz, CDCl<sub>3</sub>) δ: 7.88 (d, *J* = 8.0 Hz, 2H), 7.34-7.32 (m, 5H), 7.22-7.11 (m, 8H), 7.0 (d, *J* = 8.4 Hz, 2H), 6.74 (s, 0.9H), 6.67 (s, 0.1H), 4.85 (s, 0.9H), 4.83 (s, 0.1H), 3.86 (s, 3H); <sup>13</sup>C NMR (100 MHz, CDCl<sub>3</sub>) δ: 160.2, 160.1, 150.0, 149.8, 142.4, 141.4, 138.6, 137.4, 136.1, 134.8, 134.7, 134.7, 132.7, 132.6, 132.5, 129.4, 129.0, 128.7, 128.7, 128.6, 128.6, 128.4, 128.3, 128.2, 127.6, 127.5, 127.1, 127.0, 125.4, 121.5, 121.4, 117.2, 117.1, 115.6, 114.1, 101.0, 100.8, 85.7, 85.6, 56.2, 55.5, 55.4; HRMS *m/z* (ESI) calcd for C<sub>32</sub>H<sub>23</sub><sup>35</sup>Cl<sub>2</sub>O ([M+H]<sup>+</sup>) 493.1120, found 493.1126.

**1-(4-chlorobenzylidene)-3-((4-chlorophenyl)ethynyl)-2-(4-fluorophenyl)-1,2-dihydronaphthalene (3kd):**

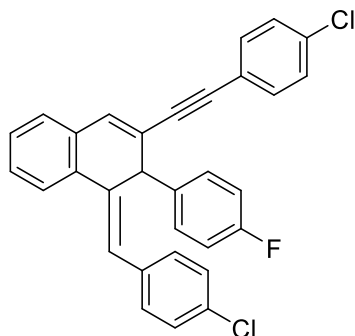

66.2 mg, 69%; *E/Z* = 1.5:1; Yellow oil; <sup>1</sup>H NMR (400 MHz, CDCl<sub>3</sub>) δ: 7.89-7.87 (m, 2H), 7.33-7.11 (m, 15H), 6.71 (s, 0.6H), 6.64 (s, 0.4H), 4.86 (s, 0.6H), 4.84 (s, 0.4H); <sup>19</sup>F NMR (471 MHz, CDCl<sub>3</sub>) δ: -110.4, -110.5; <sup>13</sup>C NMR (100 MHz, CDCl<sub>3</sub>) δ: 162.8 (d, *J* = 248.5 Hz), 149.2, 148.9, 142.0, 141.0, 138.1, 137.0, 135.8, 135.0, 134.9, 134.5, 132.8, 132.7, 132.6, 129.9 (d, *J* = 1.9 Hz), 129.4, 129.1, 129.1, 129.0, 129.0, 128.9, 128.9, 128.8, 128.6, 128.4, 128.3, 128.3, 127.6, 121.1 (d, *J* = 6.4 Hz), 117.3, 115.7 (d, *J* = 21.4 Hz), 115.7, 101.5, 101.4, 85.2, 85.0, 56.3, 55.7; HRMS *m/z* (ESI) calcd for C<sub>31</sub>H<sub>20</sub><sup>35</sup>Cl<sub>2</sub>F ([M+H]<sup>+</sup>) 481.0921, found 481.0929.

**1-(4-chlorobenzylidene)-2-(4-chlorophenyl)-3-((4-chlorophenyl)ethynyl)-1,2-dihydronaphthalene (3le):**

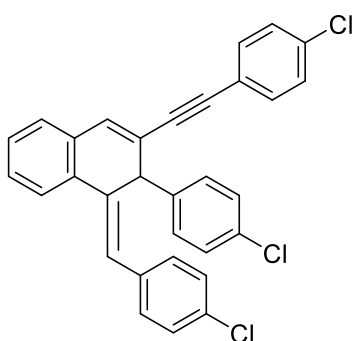

71.4 mg, 72%; *E/Z* = 9:1; Yellow oil; <sup>1</sup>H NMR (400 MHz, CDCl<sub>3</sub>) δ: 7.83-7.82 (m, 2H), 7.45-7.13 (m, 15H), 6.71 (s, 0.9H), 6.64 (s, 0.1H), 4.86 (s, 1H); <sup>13</sup>C NMR (100 MHz, CDCl<sub>3</sub>) δ: 149.0, 148.7, 141.8, 140.8, 138.0, 136.8, 135.8, 135.1, 135.0, 134.8, 134.7, 132.8, 132.8, 132.7, 130.7, 130.0, 129.4, 129.0, 128.9, 128.8, 128.7, 128.7, 128.4, 128.3, 128.3, 127.6, 127.3, 127.2, 121.1, 121.0, 117.4, 115.9, 102.0, 101.9, 85.1, 85.0, 56.4, 55.8; HRMS *m/z* (ESI) calcd for C<sub>31</sub>H<sub>20</sub><sup>35</sup>Cl<sub>3</sub> ([M+H]<sup>+</sup>) 497.0625, found 497.0634.

**1-(4-chlorobenzylidene)-3-((4-chlorophenyl)ethynyl)-2-(m-tolyl)-1,2-dihydronaphthalene**

**(3md):**

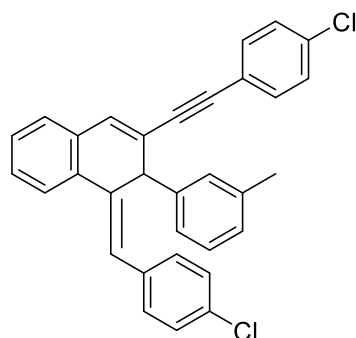

54.3 mg, 57%; *E/Z* = 4:1; Yellow oil; <sup>1</sup>H NMR (400 MHz, CDCl<sub>3</sub>) δ: 7.38-7.70 (m, 2H), 7.37-7.09 (m, 15H), 6.76 (s, 0.8H), 6.69 (s, 0.2H), 4.85 (s, 0.8H), 4.83 (s, 0.2H), 2.44 (s, 3H); <sup>13</sup>C NMR (100 MHz, CDCl<sub>3</sub>) δ: 150.6, 150.4, 142.4, 141.3, 138.3, 137.2, 136.0, 134.8, 134.7, 132.7, 132.6, 132.5, 132.3, 130.1, 129.9, 129.8, 129.4, 129.4, 129.0, 128.8, 128.7, 128.6, 128.4, 128.3, 127.7, 127.7, 127.6, 127.2, 127.0, 124.2, 124.2, 121.4, 121.3, 117.3, 115.7, 101.4, 101.2, 85.5, 85.4, 56.3, 55.6, 21.6; HRMS *m/z* (ESI) calcd for C<sub>32</sub>H<sub>23</sub><sup>35</sup>Cl<sub>2</sub> ([M+H]<sup>+</sup>) 477.1171, found 477.1174.

**1-(4-chlorobenzylidene)-2-(3-chlorophenyl)-3-((4-chlorophenyl)ethynyl)-1,2-dihydronaphthalene (3nd):**

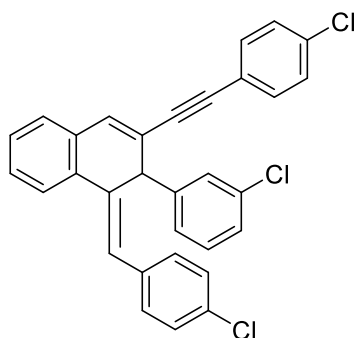

54.6 mg, 55%; *E/Z* = 1.2:1; Yellow oil; <sup>1</sup>H NMR (400 MHz, CDCl<sub>3</sub>) δ: 7.93 (s, 1H), 7.76-7.75 (m, 1H), 7.37-7.12 (m, 15H), 6.73 (s, 0.55H), 6.66 (s, 0.45H), 4.86 (s, 0.55H), 4.85 (s, 0.45H); <sup>13</sup>C NMR (100 MHz, CDCl<sub>3</sub>) δ: 148.7, 148.4, 141.7, 140.7, 137.9, 136.7, 135.7, 135.1, 135.1, 134.7, 134.4, 133.9, 132.8, 132.7, 131.5, 130.7, 130.0, 129.4, 129.0, 128.9, 128.9, 128.8, 128.8, 128.7, 128.7, 128.4, 128.3, 127.6, 127.3, 127.2, 127.1, 127.0, 121.0, 120.9, 117.5, 115.9, 102.5, 102.3, 85.1, 84.9, 56.5, 55.8; HRMS *m/z* (ESI) calcd for C<sub>31</sub>H<sub>20</sub><sup>35</sup>Cl<sub>3</sub> ([M+H]<sup>+</sup>) 497.0625, found 497.0630.

**2-(1-(4-chlorobenzylidene)-3-((4-chlorophenyl)ethynyl)-1,2-dihydronaphthalen-2-yl)thiophene (3od):**

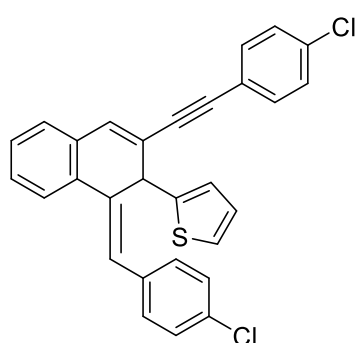

54.6 mg, 55%; *E/Z* > 99:1; Yellow oil; <sup>1</sup>H NMR (400 MHz, CDCl<sub>3</sub>) δ: 7.65 (s, 1H), 7.45-7.38 (m, 4H), 7.31-7.12 (m, 12H), 6.73 (s, 0.96H), 6.67 (s, 0.04H), 4.90 (s, 1H); <sup>13</sup>C NMR (100 MHz, CDCl<sub>3</sub>) δ: 144.4, 140.1, 137.1, 135.7, 134.9, 134.0, 133.7, 132.8, 129.1, 128.9,



128.8, 128.7, 128.4, 128.3, 127.4, 127.2, 126.9, 126.9, 126.8, 121.3, 117.6, 102.8, 85.4, 55.8; HRMS  $m/z$  (ESI) calcd for  $C_{29}H_{19}^{35}Cl_2S$  ( $[M+H]^+$ ) 469.0579, found 469.0587.

**2,3'-diphenyl-3-(phenylethynyl)-2H-spiro[naphthalene-1,2'-oxirane] (4aa):**

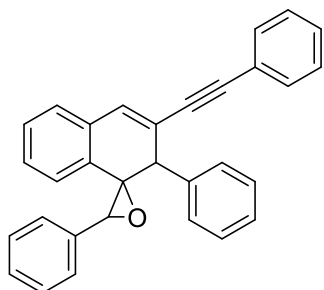

48.0 mg, 72%; Yellow oil;  $^1H$  NMR (500 MHz,  $CDCl_3$ )

$\delta$ : 7.86 (d,  $J = 6.5$  Hz, 2H), 7.50-7.36 (m, 5H), 7.30 (s, 3H), 6.95 (s, 5H), 6.89 (s, 5H), 4.62 (s, 1H), 4.47 (s, 1H);

$^{13}C$  NMR (125 MHz,  $CDCl_3$ )  $\delta$ : 146.7, 136.5, 134.5, 132.3, 131.9, 129.1, 128.9, 128.8, 128.3, 128.1, 127.6, 127.6, 127.1, 126.5, 126.5, 126.3, 125.9, 122.6, 98.7,

83.8, 77.3, 77.0, 76.8, 73.9, 59.9, 57.9; HRMS  $m/z$  (ESI) calcd for  $C_{31}H_{23}O$  ( $[M+H]^+$ ) 411.1743, found 411.1752.

**1-(4-benzylidene-3-phenyl-3,4-dihydronaphthalen-2-yl)-2-phenylethane-1,2-dione (5aa):**

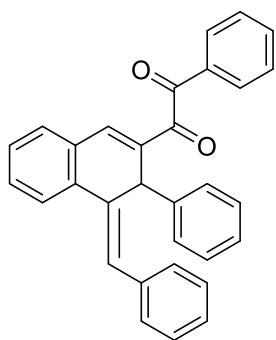

55.0 mg, 88%,  $E/Z > 99:1$ ; Yellow oil;  $^1H$  NMR (500 MHz,  $CDCl_3$ )  $\delta$ : 7.9. (d,  $J = 4$  Hz, 2H), 7.61 (d,  $J = 6.5$  Hz, 2H),

7.47 (d,  $J = 7.0$  Hz, 4H), 7.29 (d,  $J = 7.5$  Hz, 2H), 7.27 – 7.23 (m, 4H), 7.15 (s, 3H), 7.06 (t,  $J = 6.5$  Hz, 2H), 6.97 (d,  $J = 7.5$  Hz, 2H), 5.08 (s, 1H);  $^{13}C$  NMR (125 MHz,  $CDCl_3$ )

$\delta$ : 193.6, 189.0, 159.8, 142.7, 140.7, 137.9, 135.0, 134.1,

132.5, 130.8, 130.5, 129.7, 129.5, 129.1, 128.6, 128.5, 128.4, 128.4, 128.4, 128.0, 127.1, 125.0, 77.3, 77.0, 76.8, 53.2; HRMS  $m/z$  (ESI) calcd for  $C_{31}H_{23}O_2$  ( $[M+H]^+$ ) 427.1693, found 427.1698.

(C) Spectra

1-benzylidene-2-phenyl-3-(phenylethynyl)-1,2-dihydronaphthalene (3a):

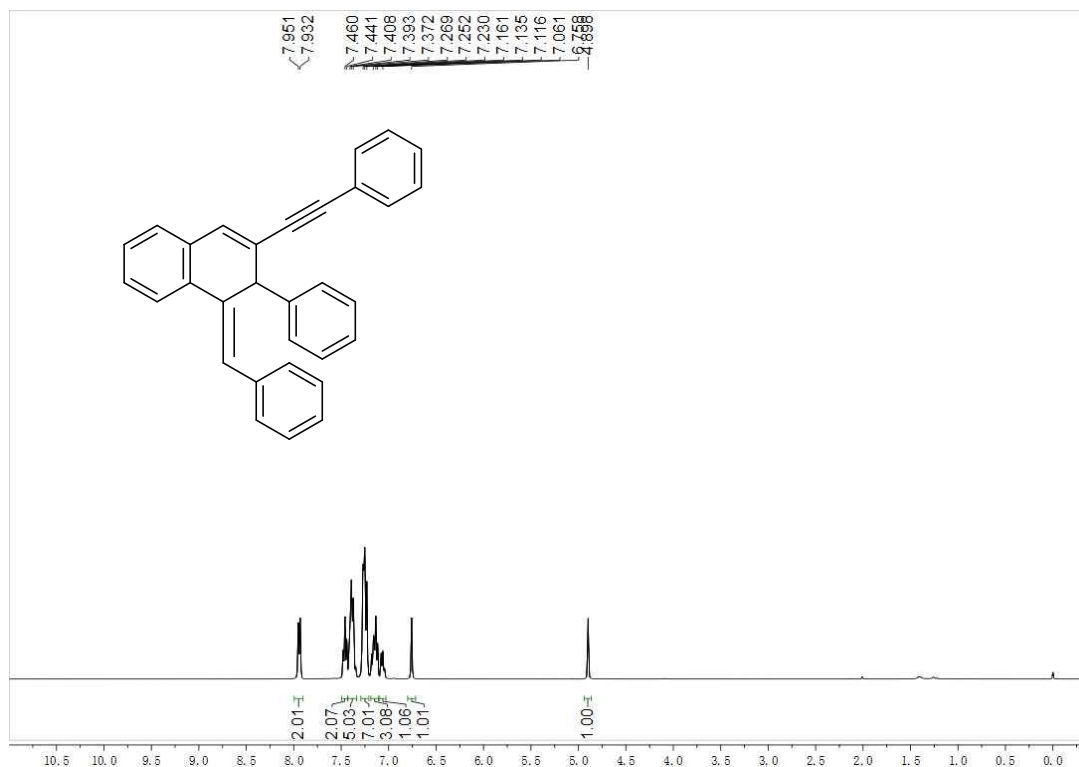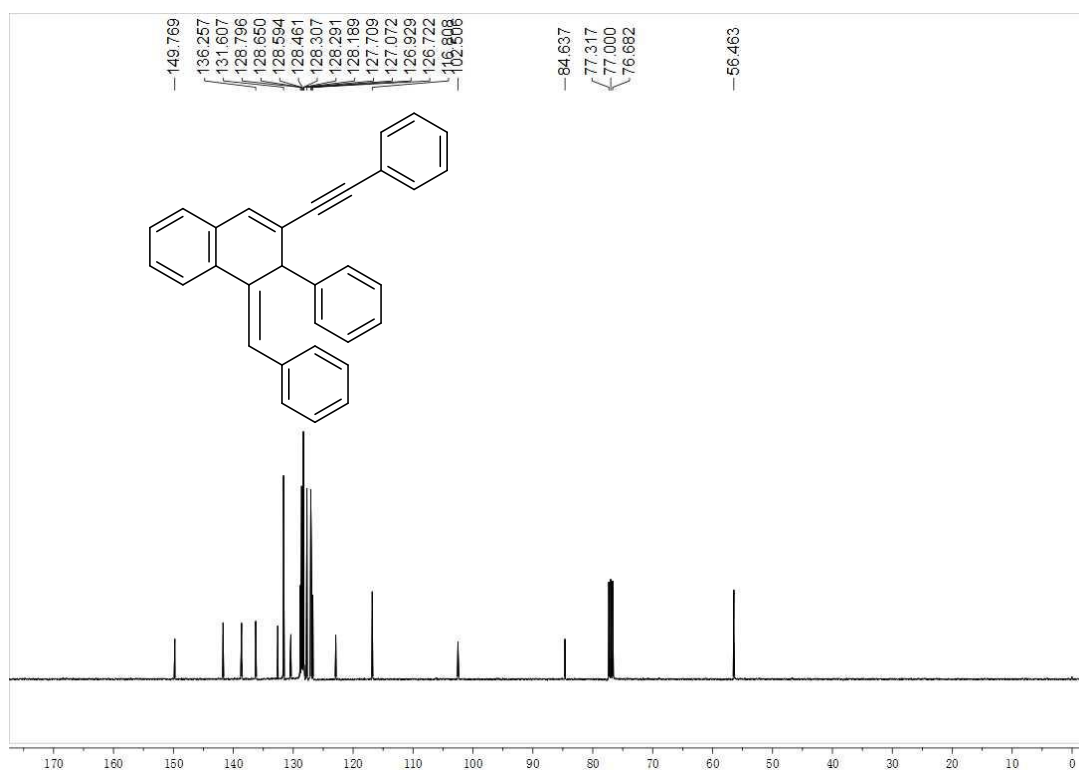

**1-(4-methylbenzylidene)-2-phenyl-3-(p-tolyethynyl)-1,2-dihydronaphthalene (3ab):**

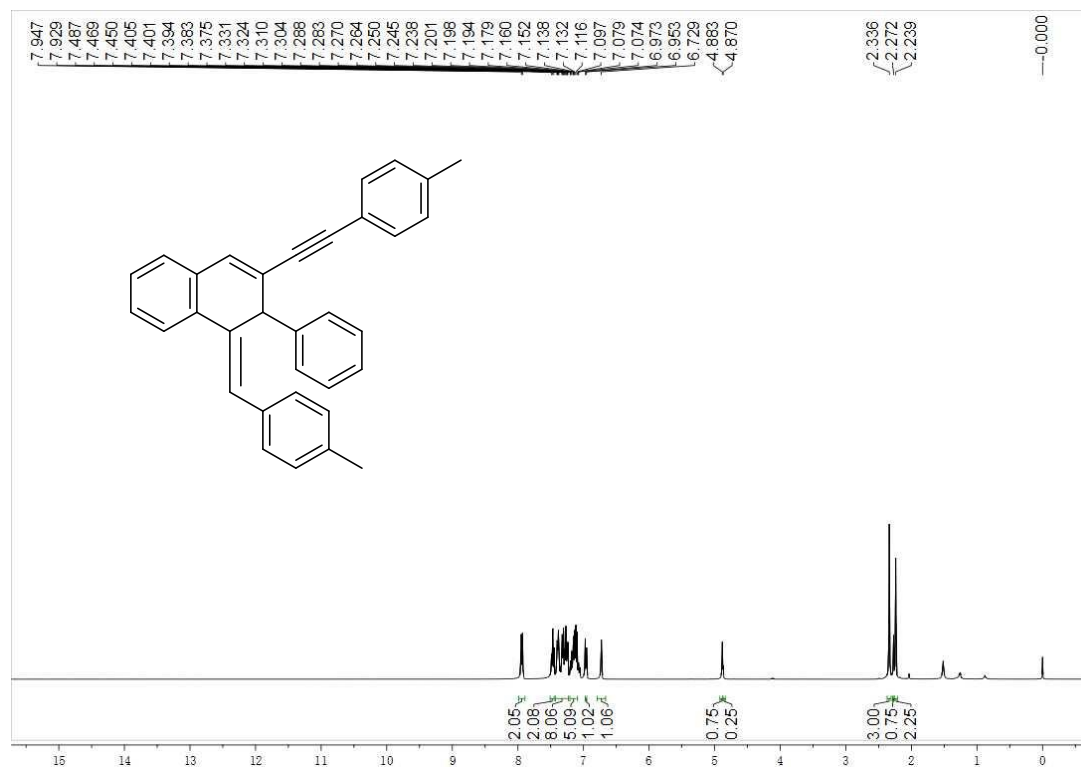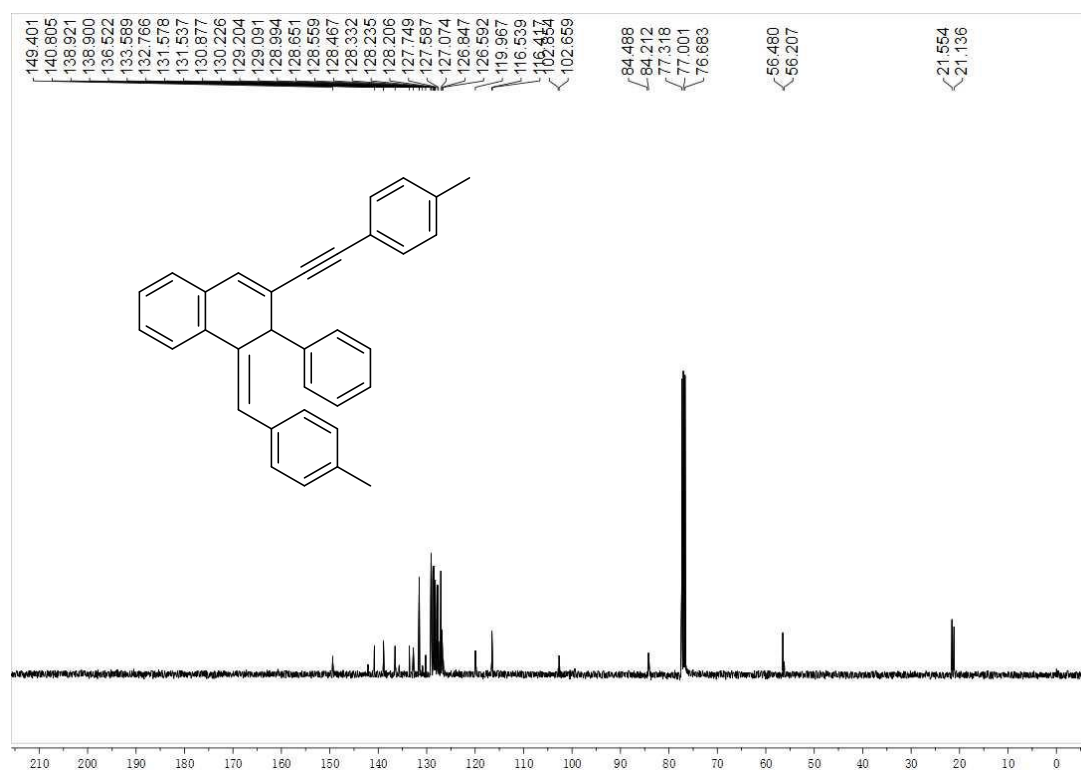

# 1-(4-fluorobenzylidene)-3-((4-fluorophenyl)ethynyl)-2-phenyl-1,2-dihydronaphthalene

(3ac):

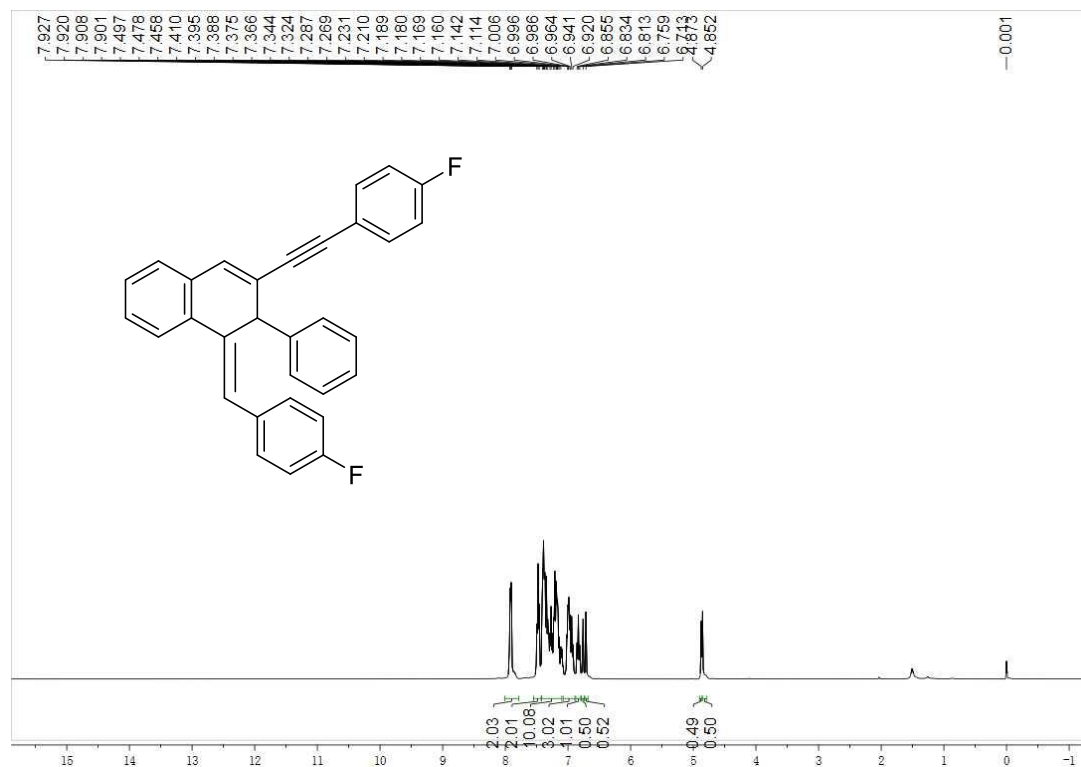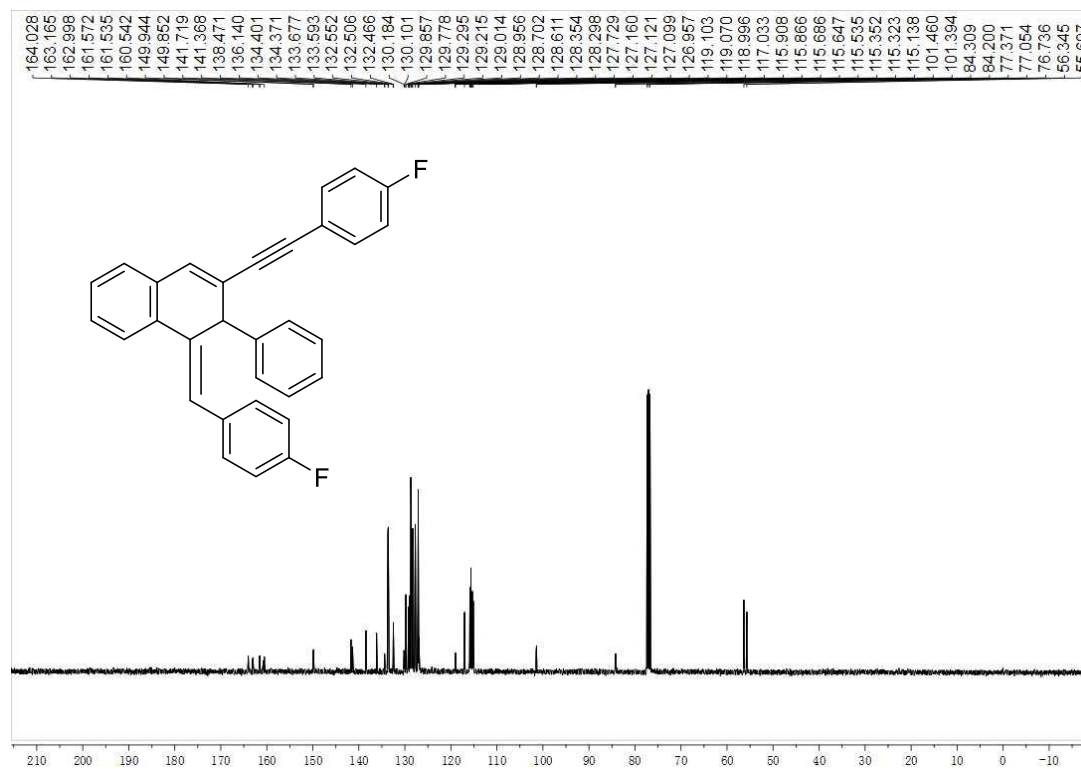

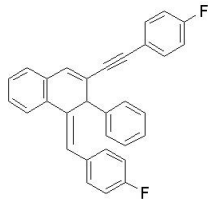

109.605  
109.725

114.791  
115.665

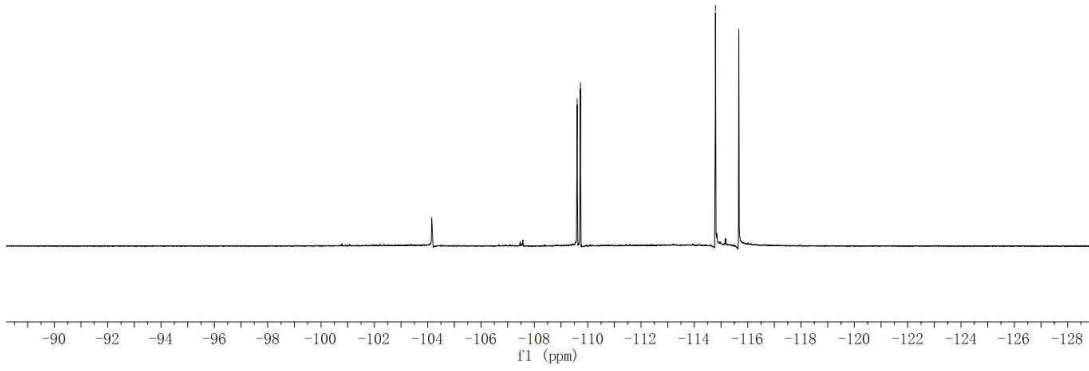

# 1-(4-chlorobenzylidene)-3-((4-chlorophenyl)ethynyl)-2-phenyl-1,2-dihydronaphthalene

(3ad):

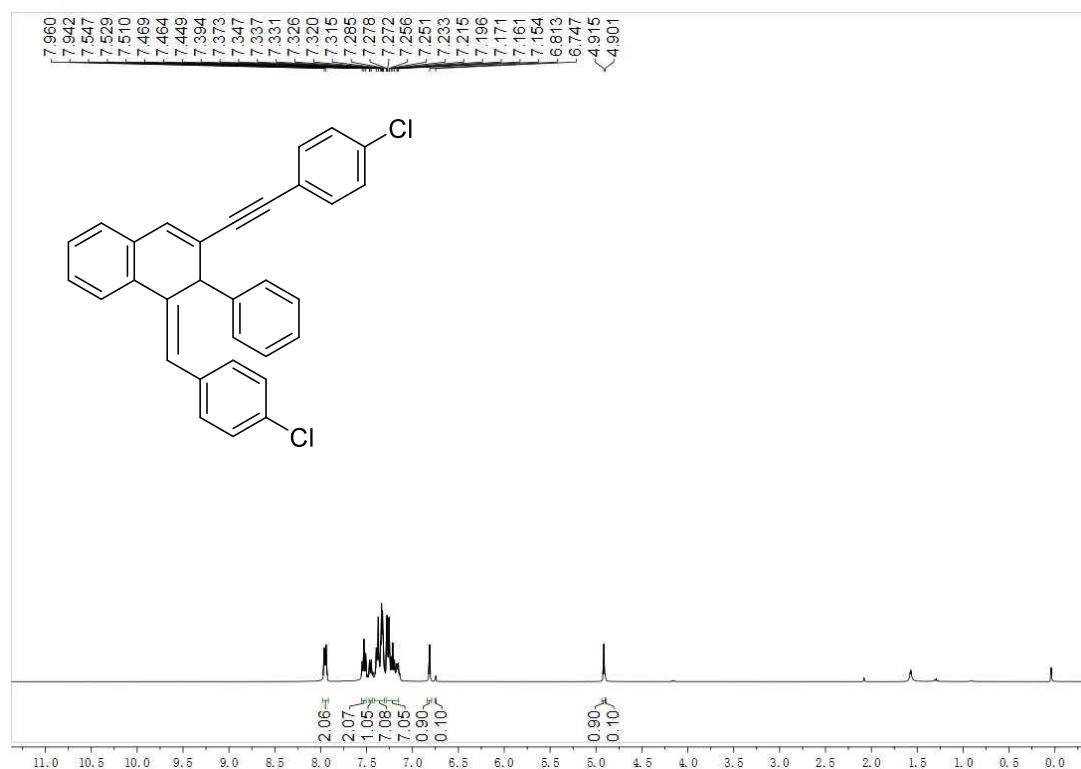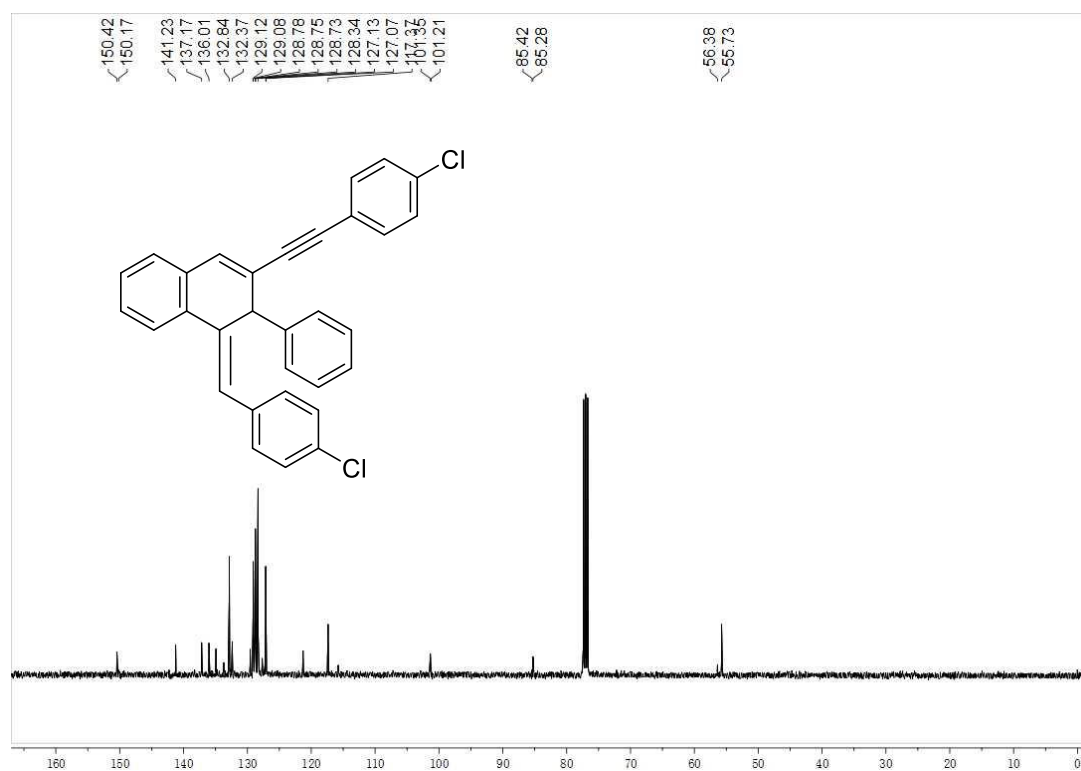

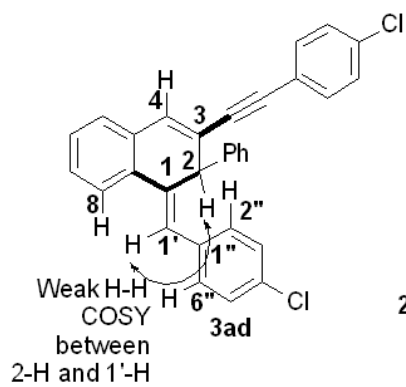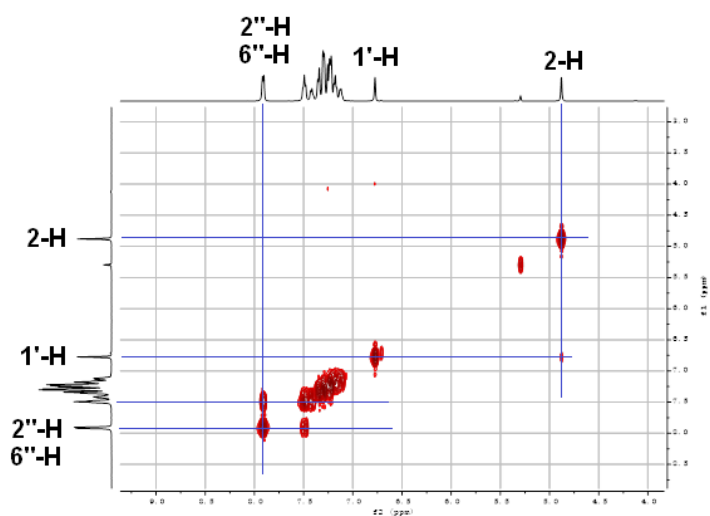

H-H COSY

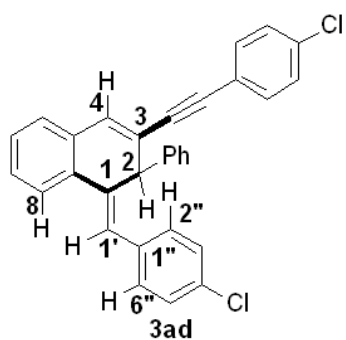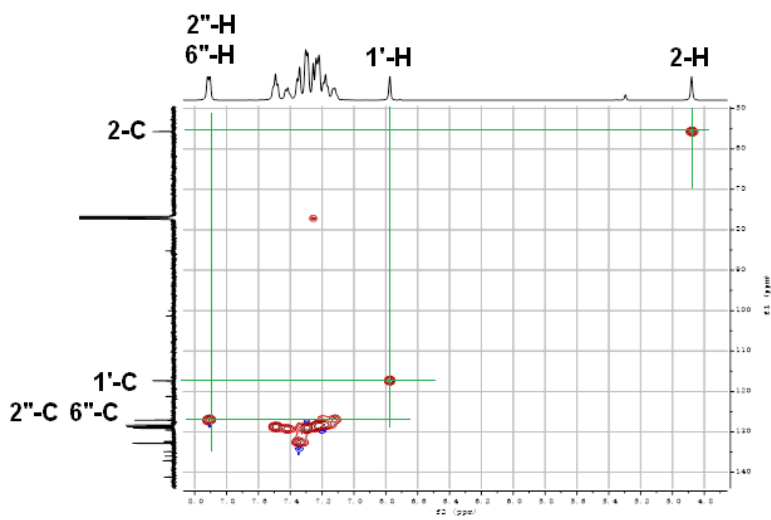

HSQC

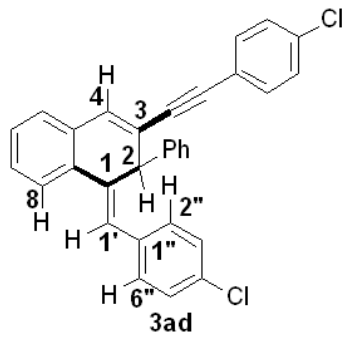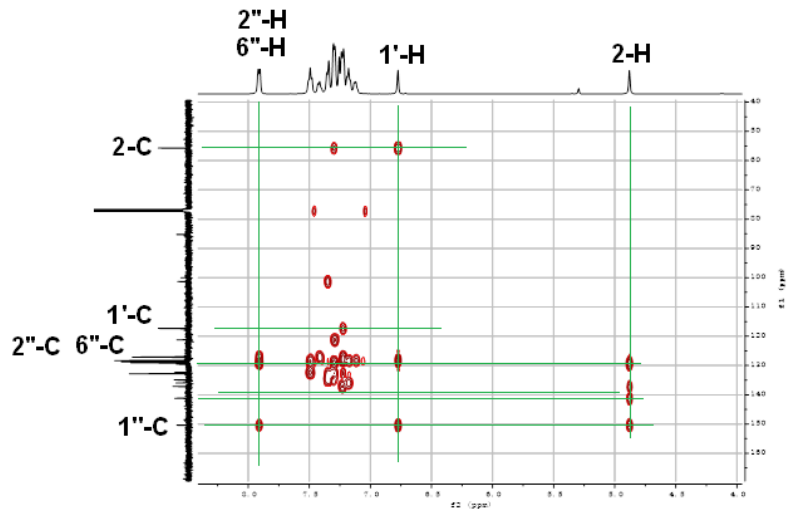

### HMBC

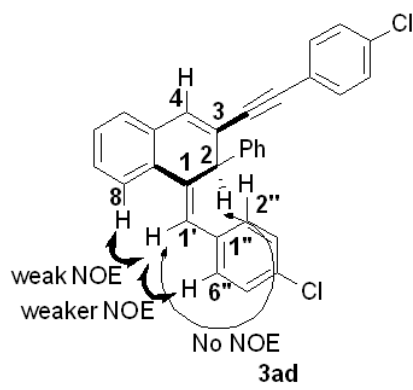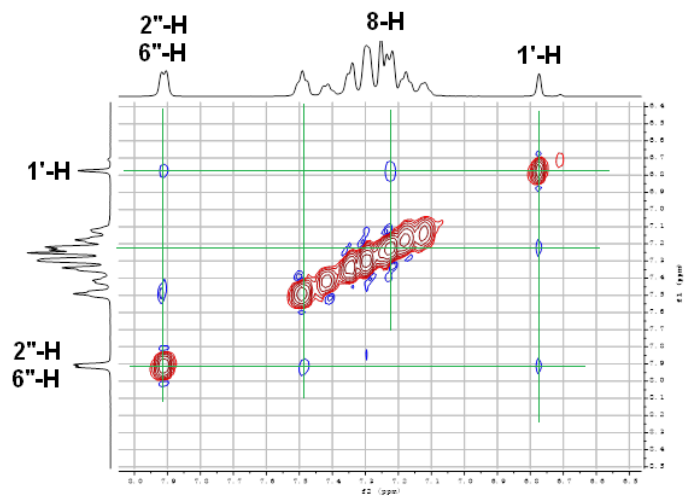

### H-H NOE



# 1-(4-bromobenzylidene)-3-((4-bromophenyl)ethynyl)-2-phenyl-1,2-dihydronaphthalene

(3ae):

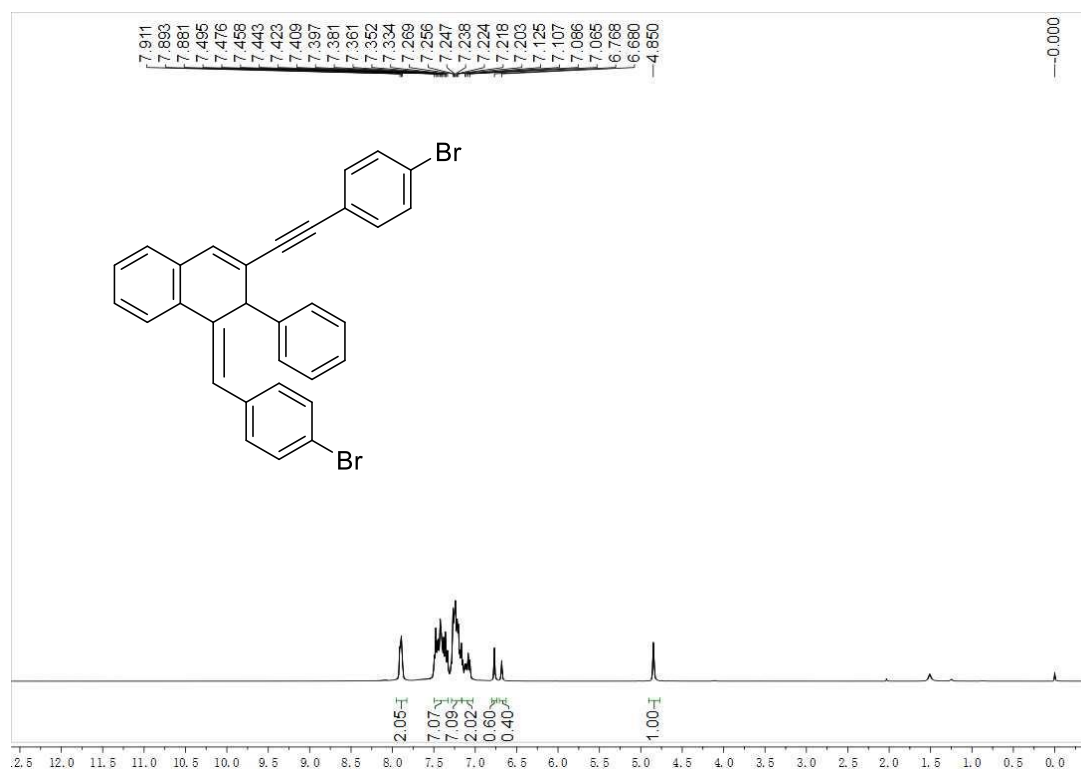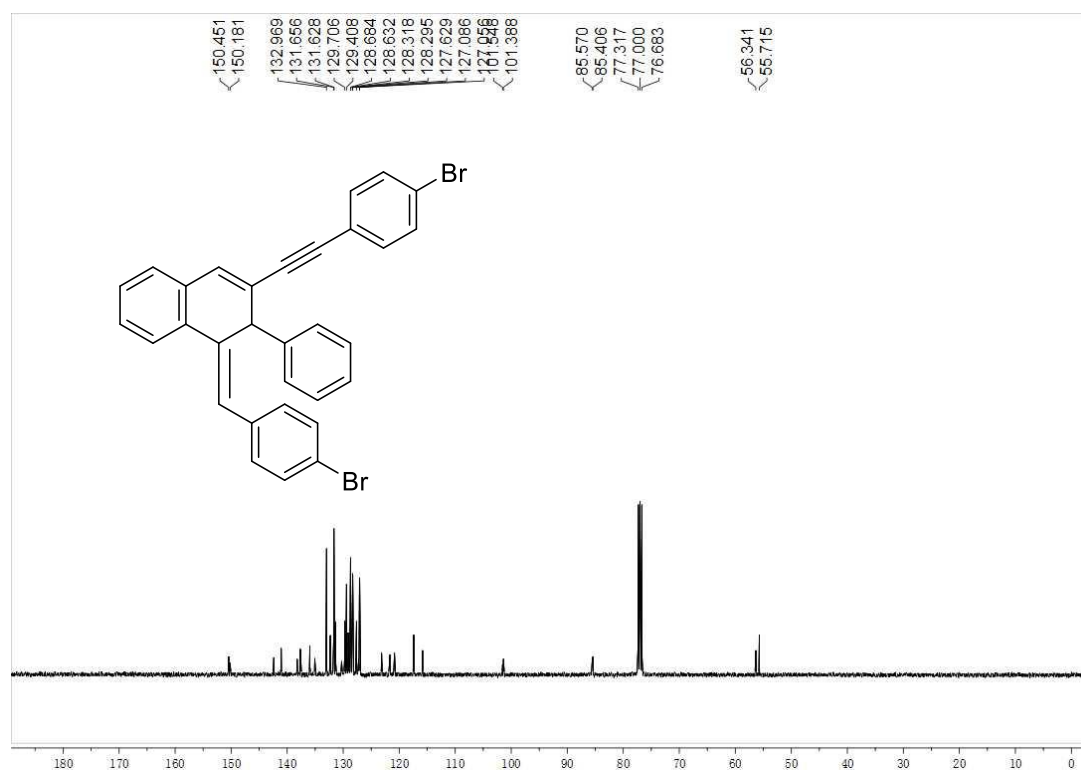

**2-phenyl-1-(4-(trifluoromethyl)benzylidene)-3-((4-(trifluoromethyl)phenyl)ethynyl)-1,2-dihydronaphthalene (3af):**

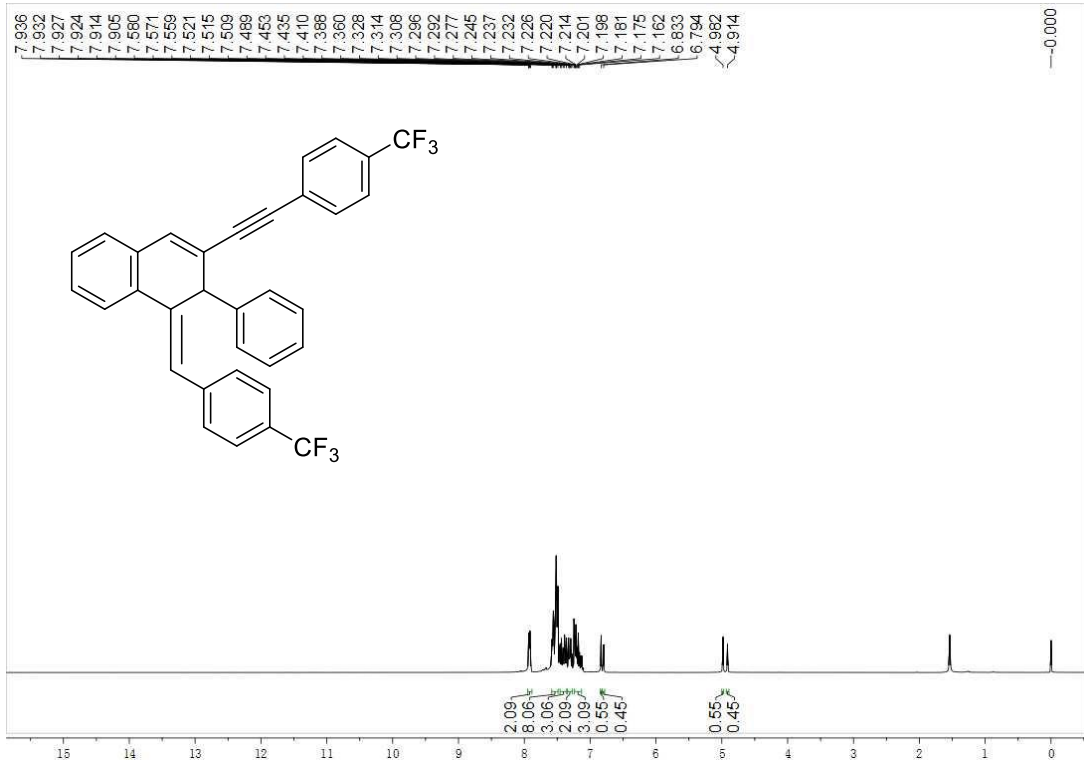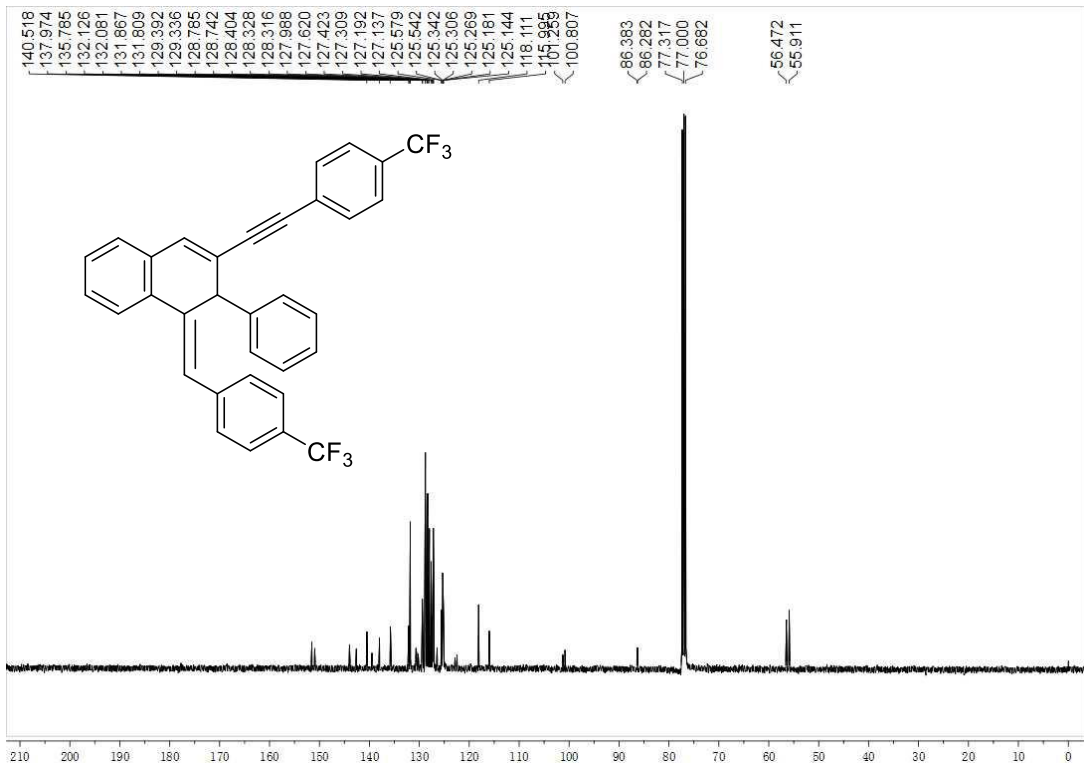

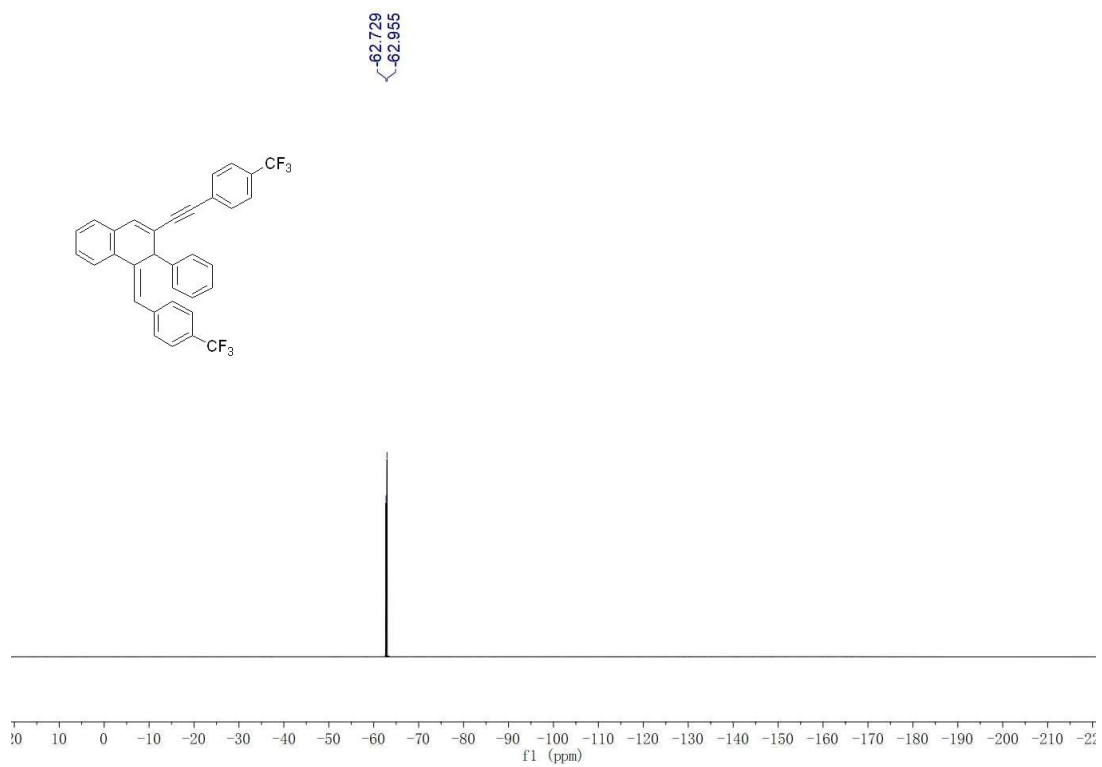

**1-(3-methylbenzylidene)-2-phenyl-3-(m-tolylethynyl)-1,2-dihydronaphthalene (3ag):**

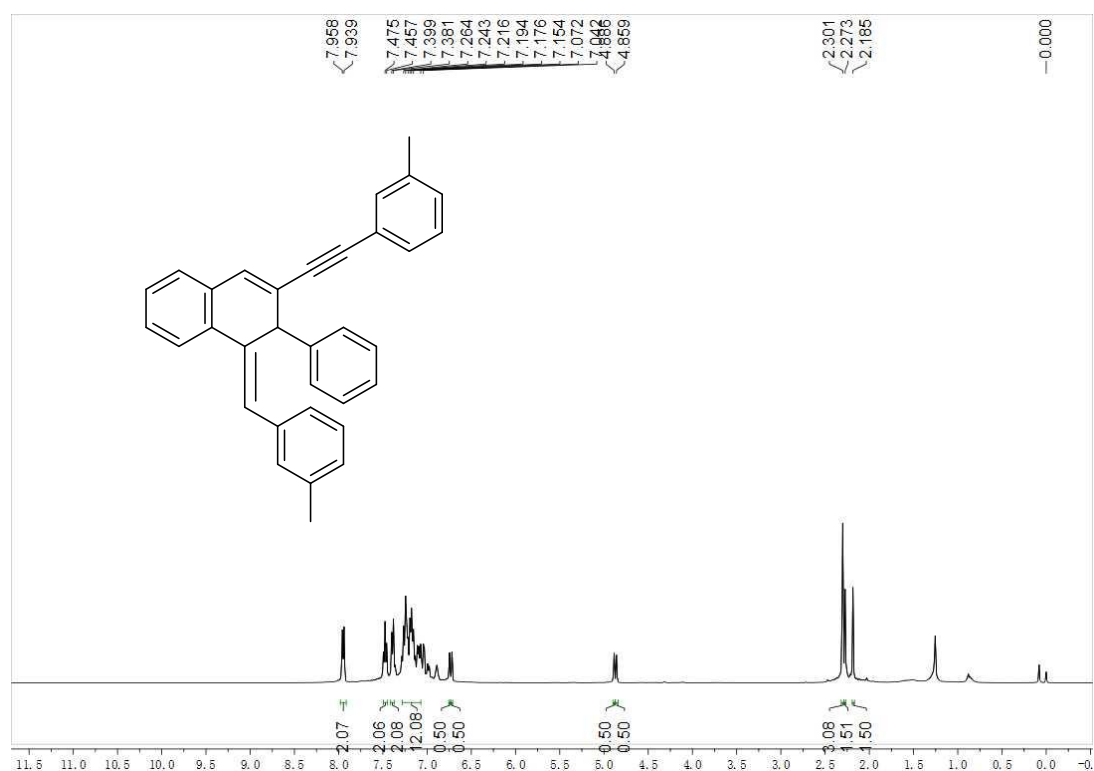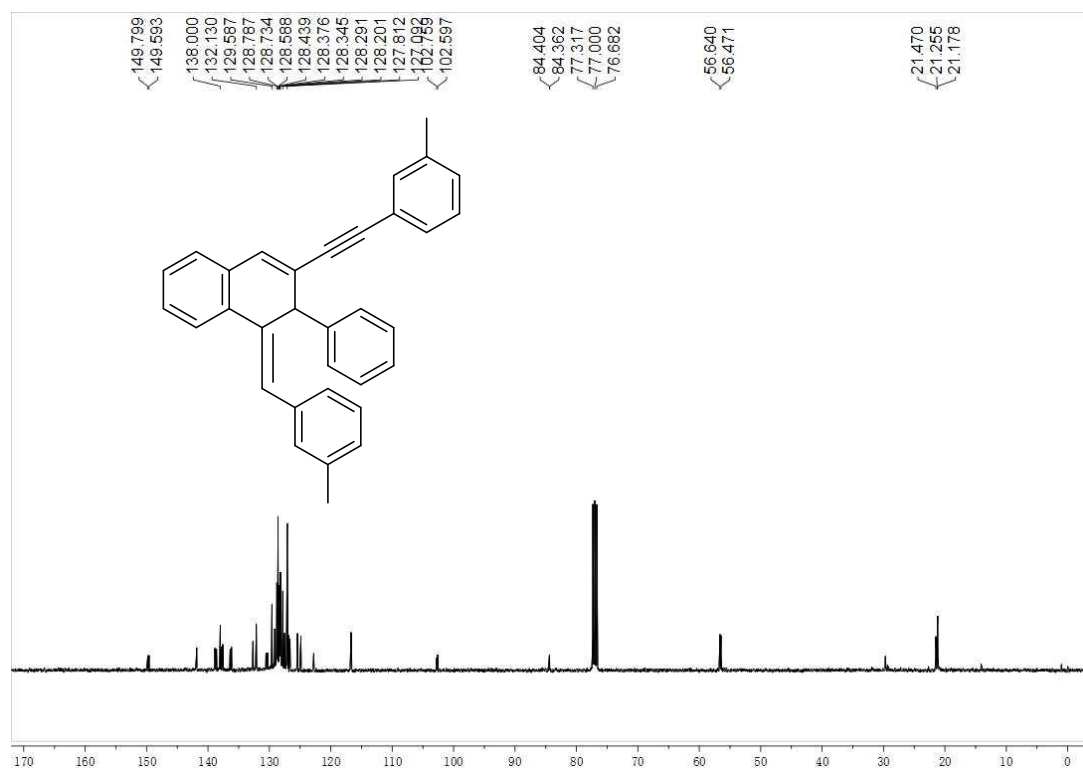

# 1-(2-chlorobenzylidene)-3-((2-chlorophenyl)ethynyl)-2-phenyl-1,2-dihydronaphthalene

(3ah):

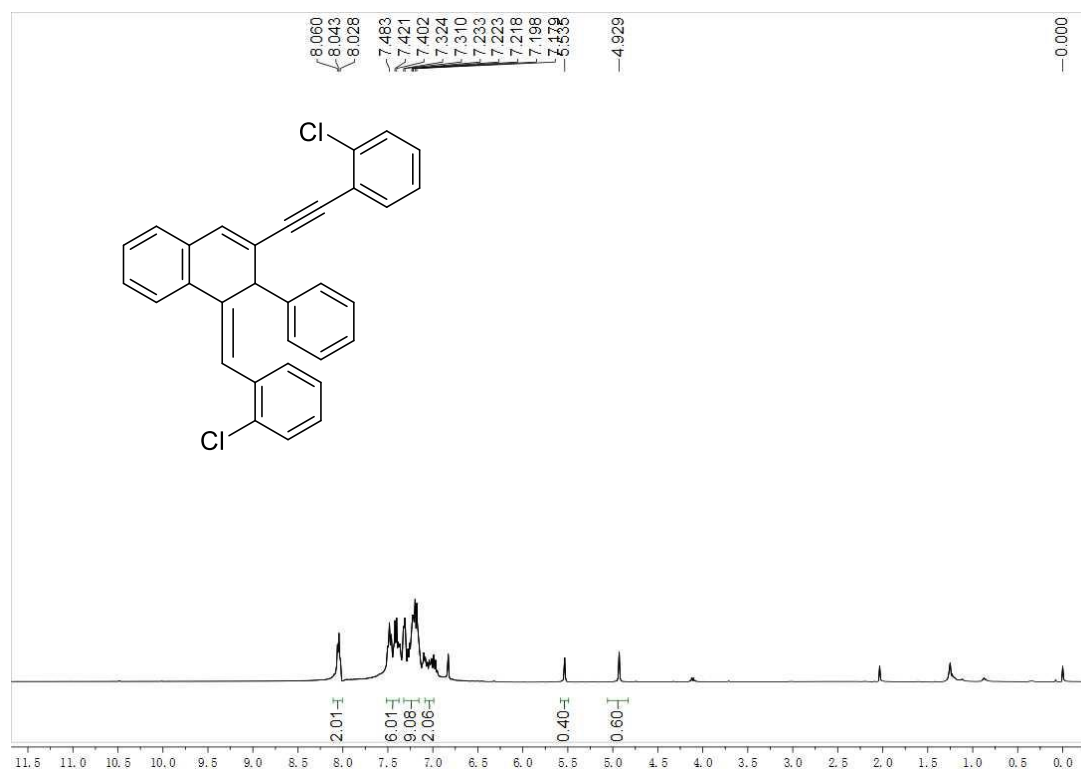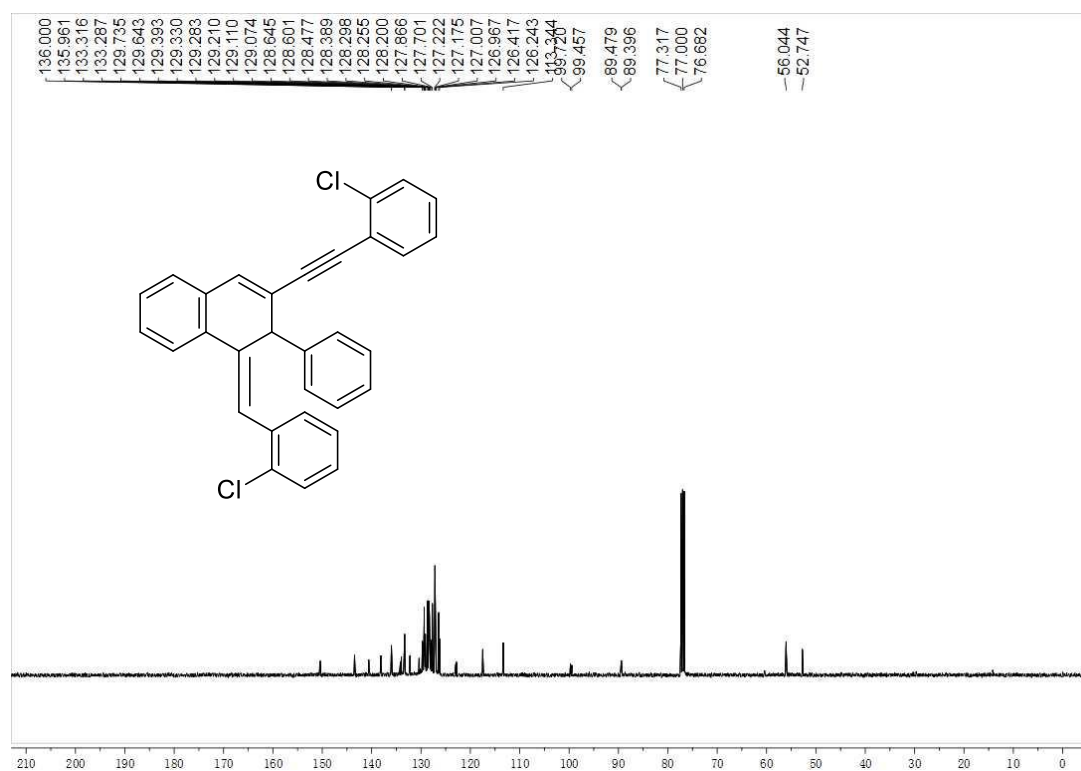

**2-((2-phenyl-3-(thiophen-2-ylethynyl)naphthalen-1-yl)methyl)thiophene (3ai):**

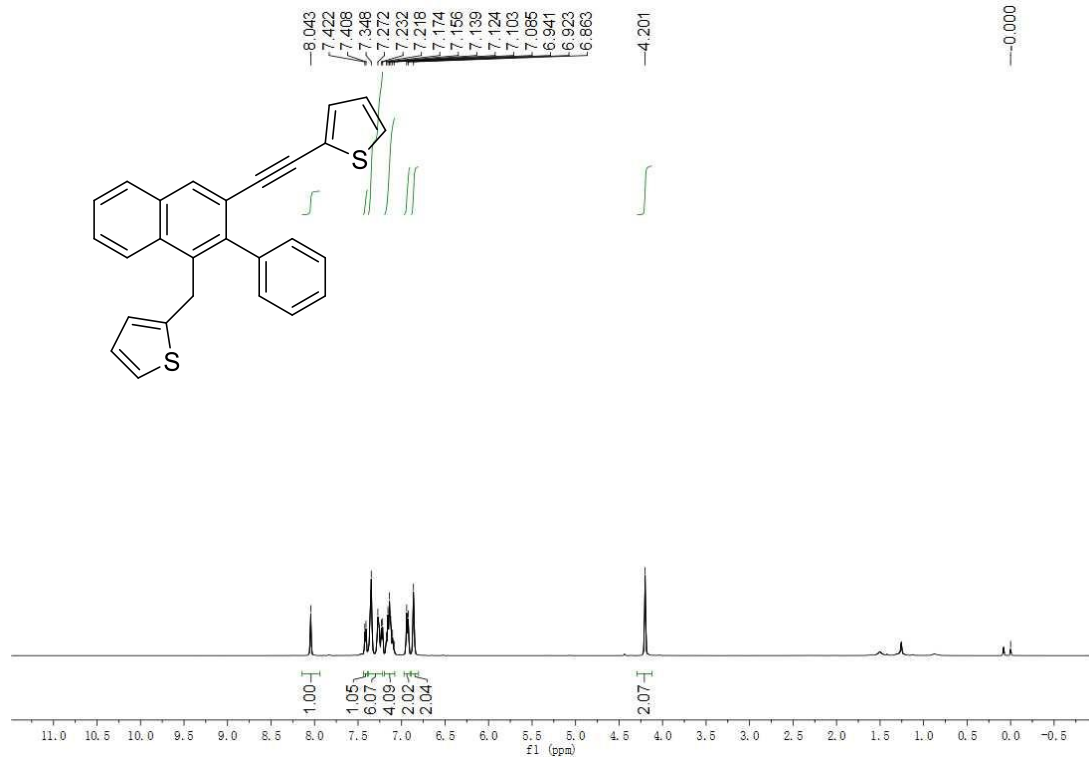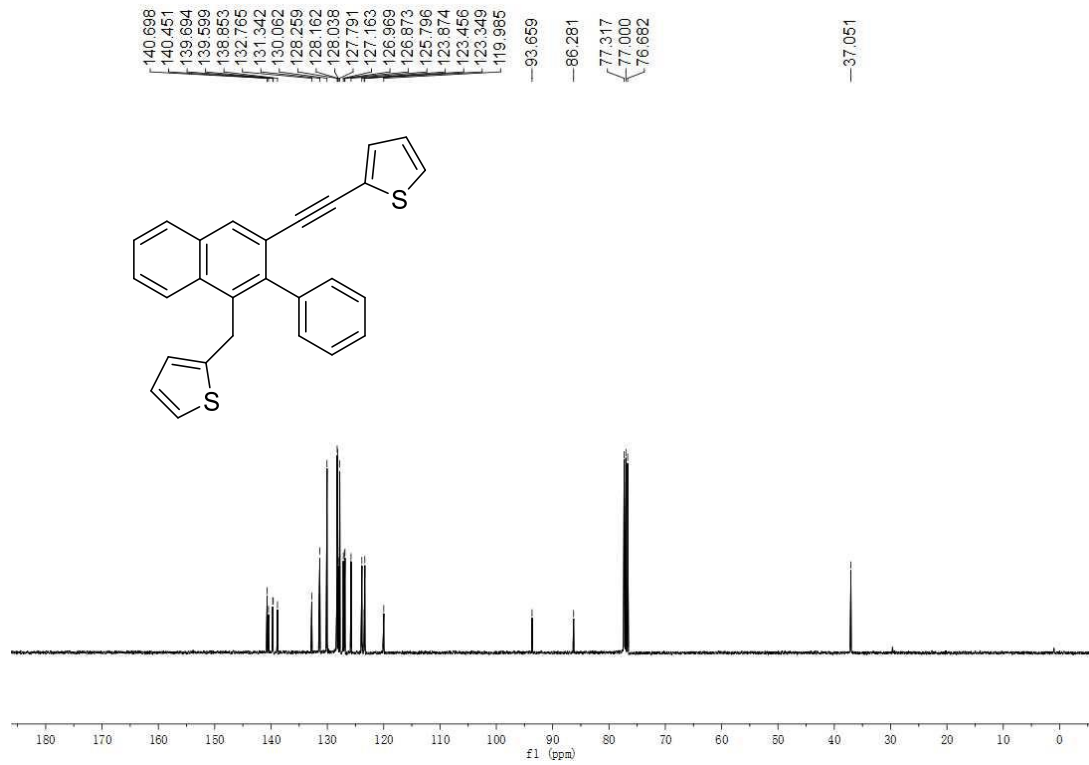

**3-((2-phenyl-3-(thiophen-3-ylethynyl)naphthalen-1-yl)methyl)thiophene (3aj):**

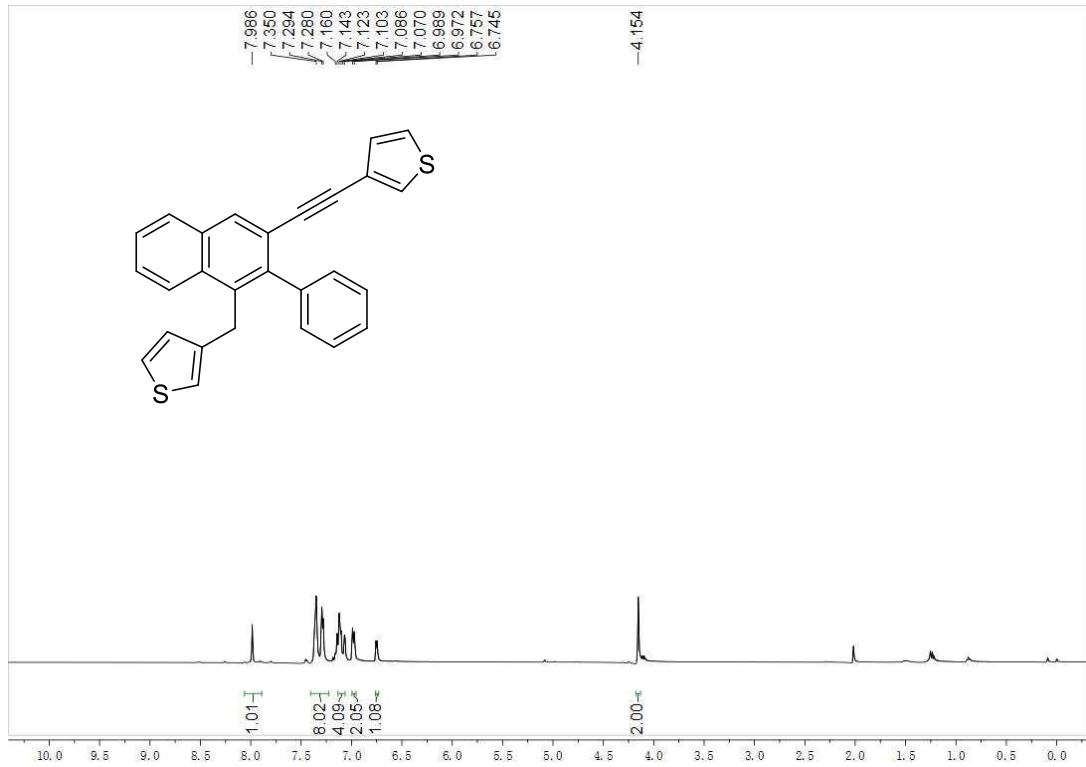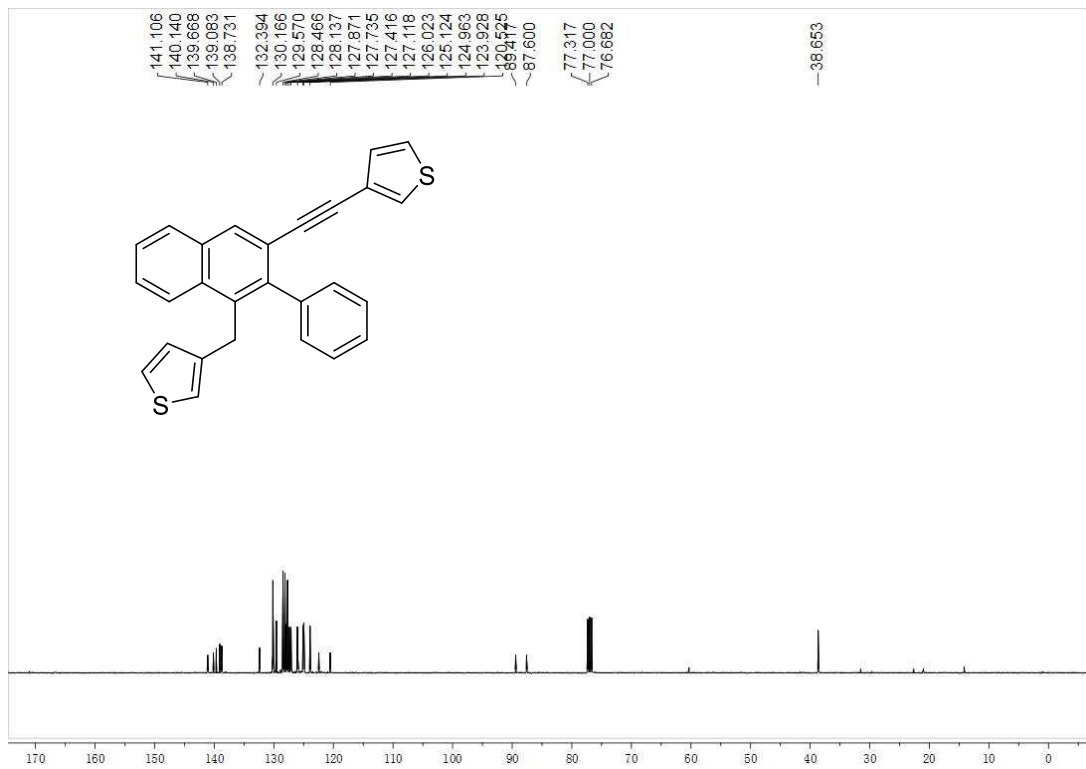

**1-(4-chlorobenzylidene)-3-((4-chlorophenyl)ethynyl)-7-methyl-2-phenyl-1,2-dihydronaphthalene (3bd):**

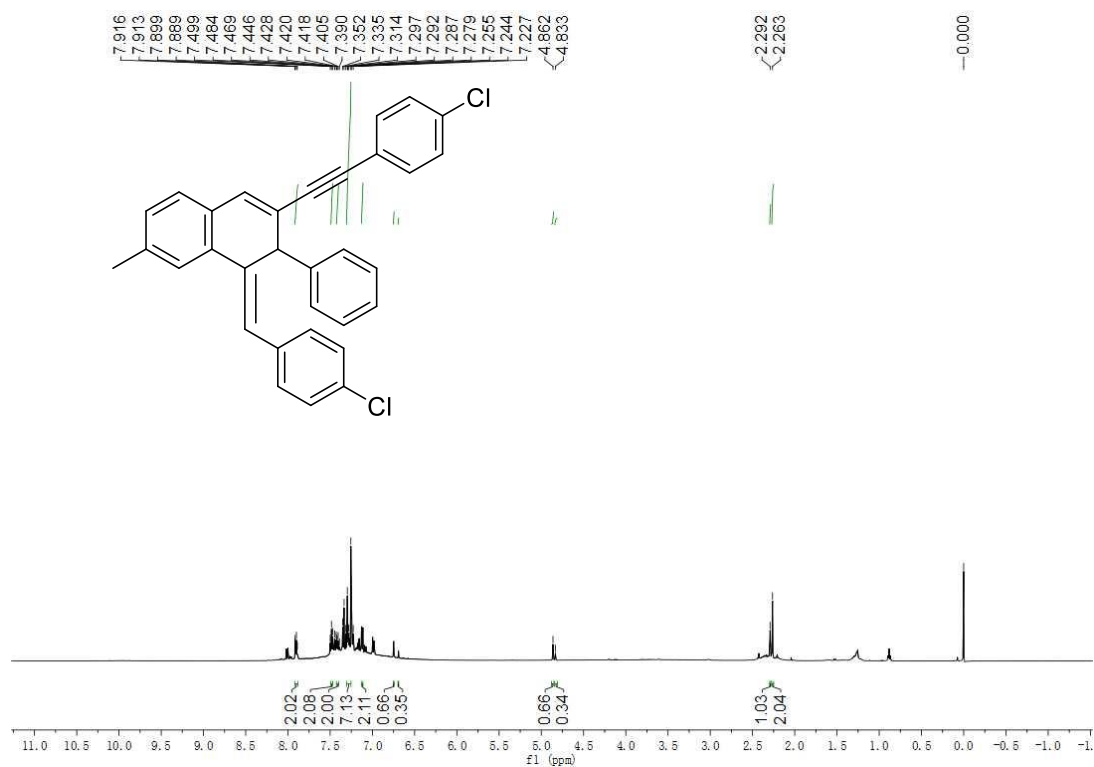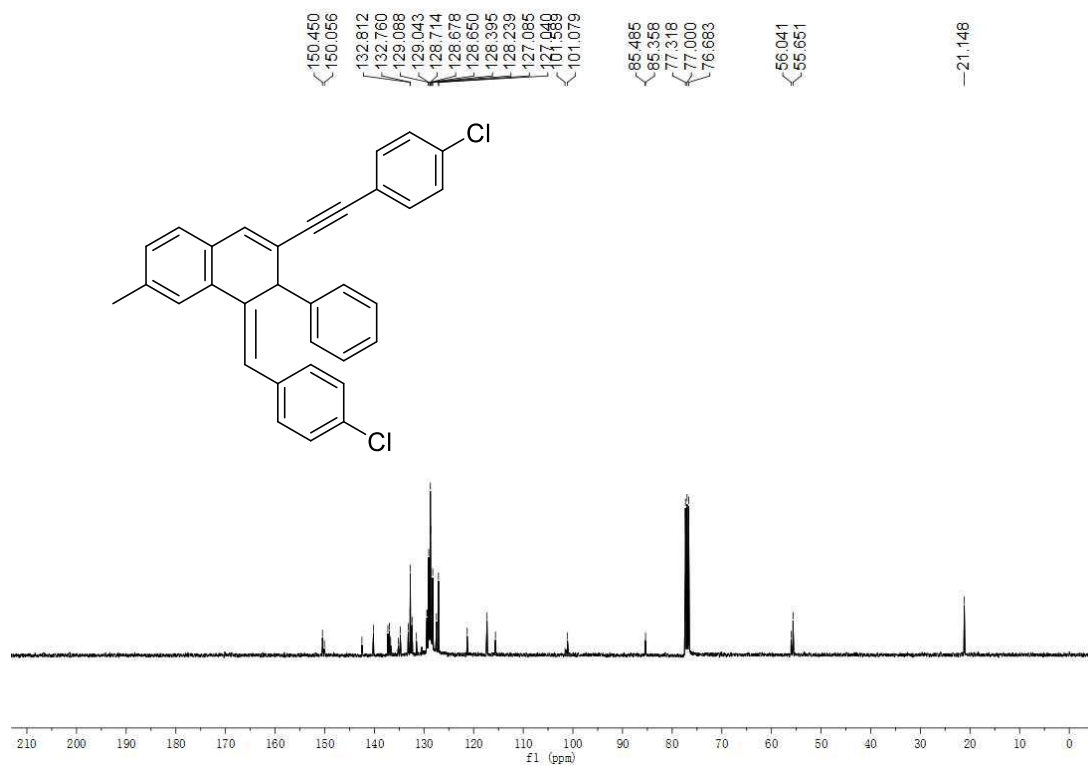



**7-(tert-butyl)-1-(4-chlorobenzylidene)-3-((4-chlorophenyl)ethynyl)-2-phenyl-1,2-dihydronaphthalene (3cd):**

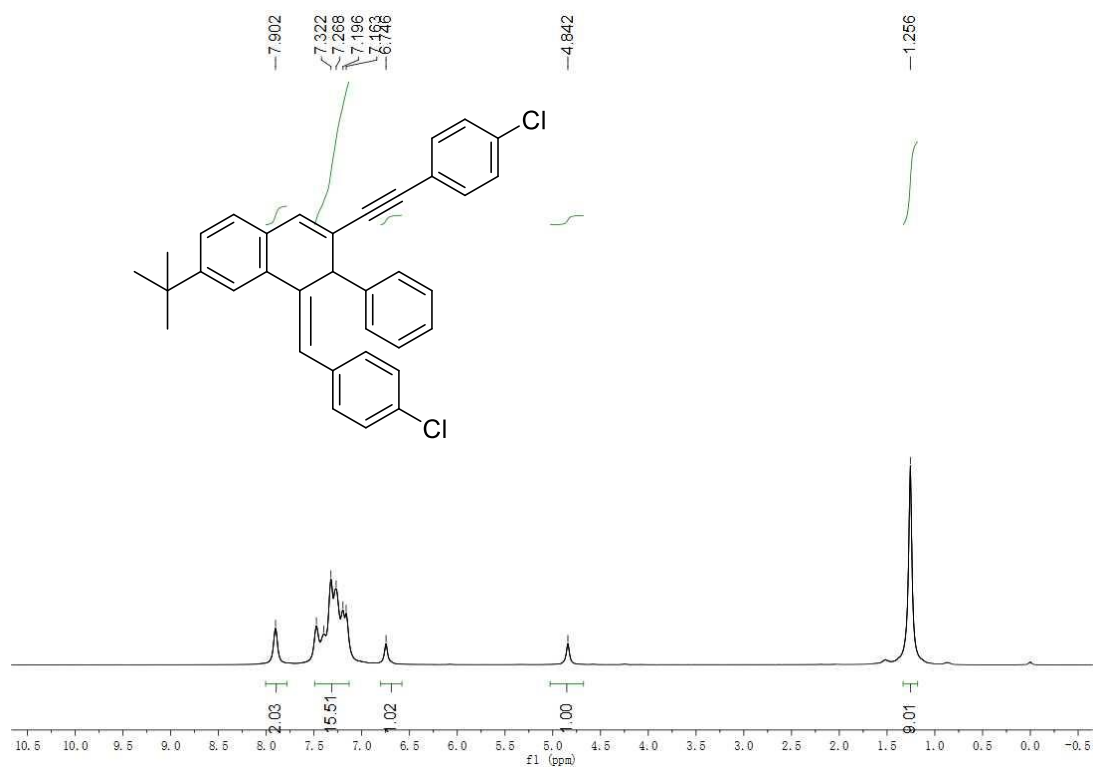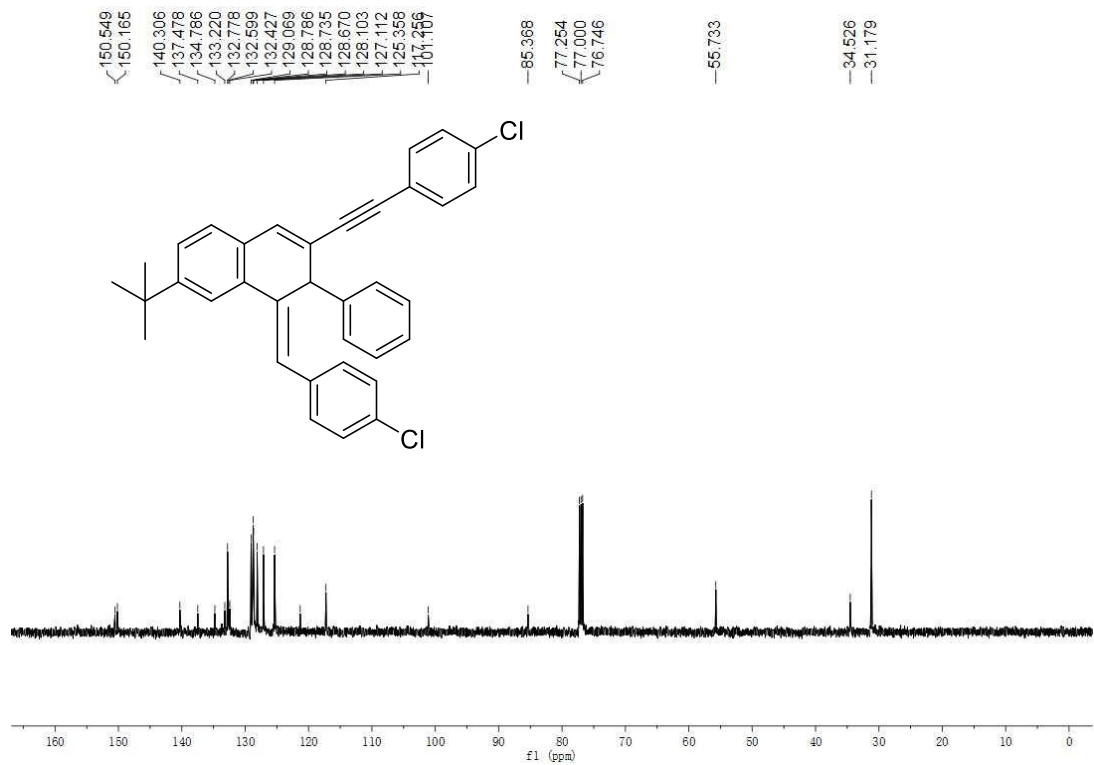

**1-(4-chlorobenzylidene)-3-((4-chlorophenyl)ethynyl)-7-fluoro-2-phenyl-1,2-dihydronaphthalene (3dd):**

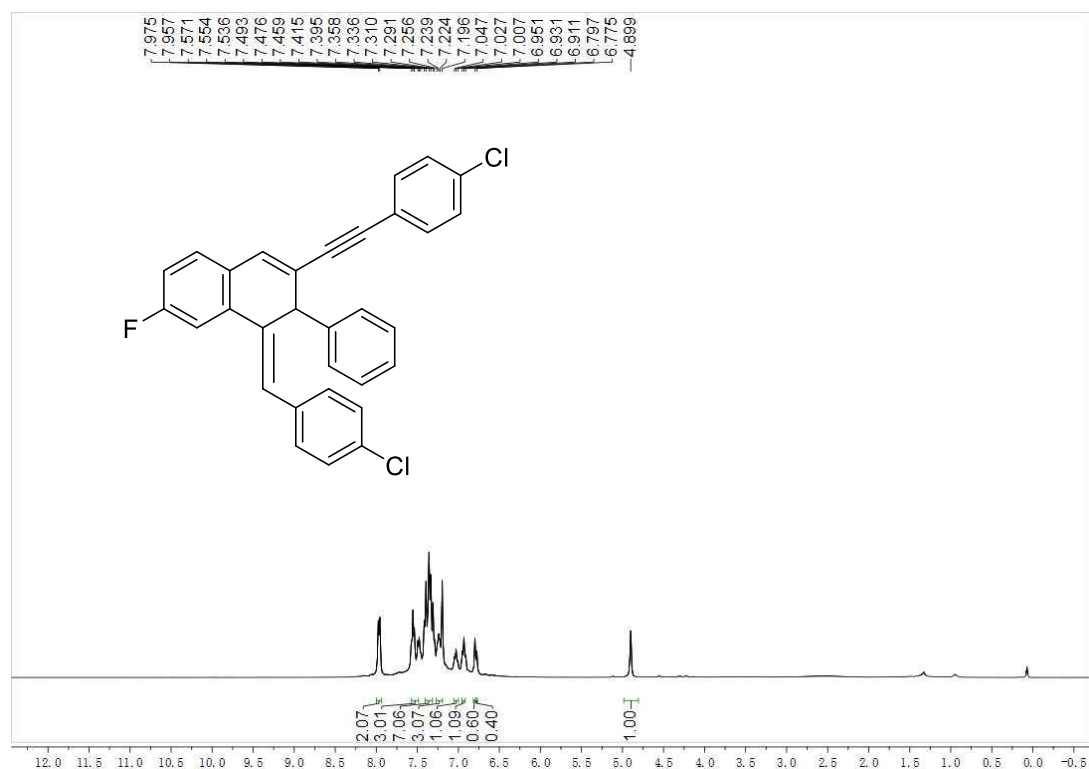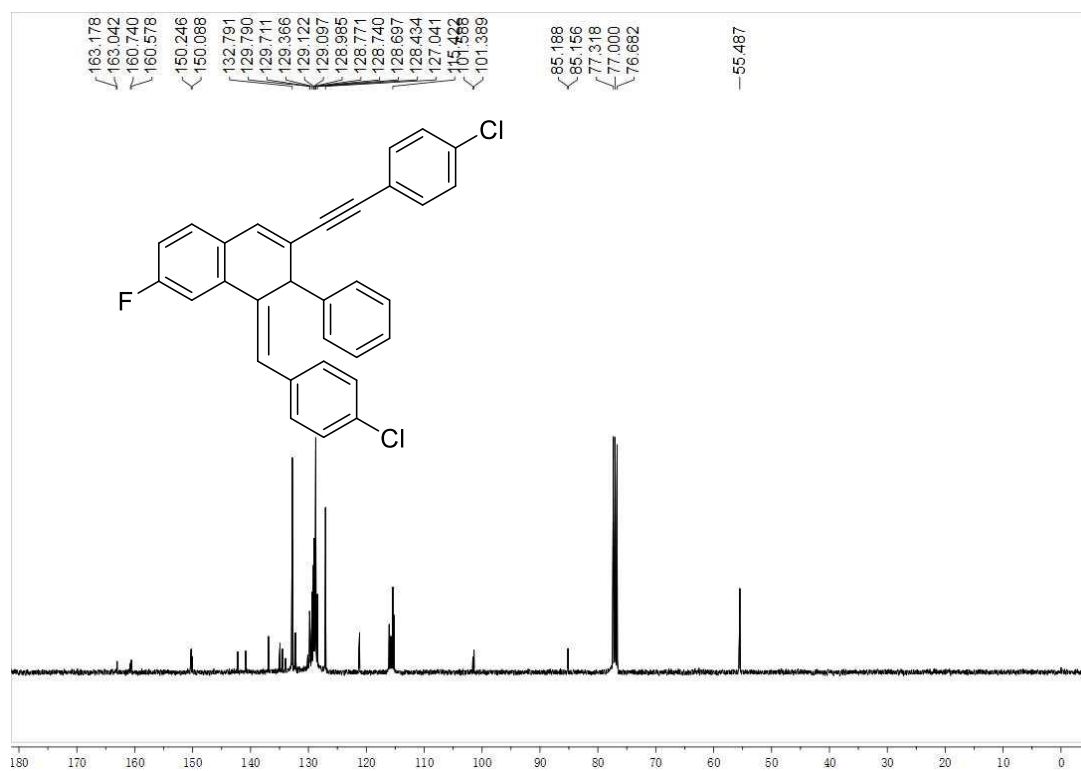

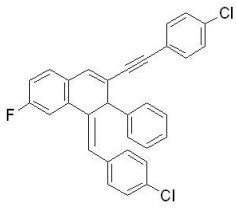

114.279  
115.191

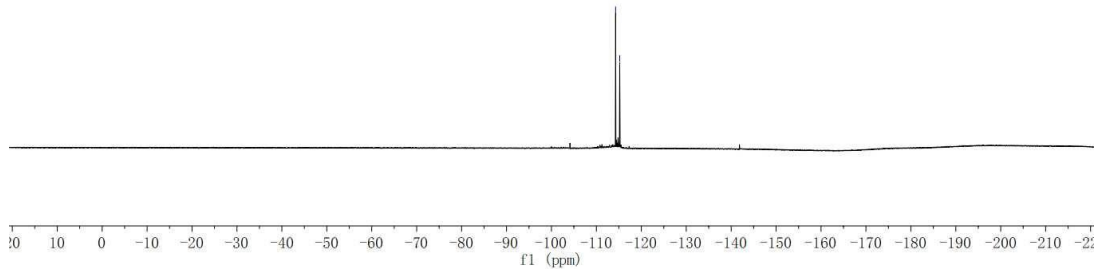

**7-chloro-1-(4-chlorobenzylidene)-3-((4-chlorophenyl)ethynyl)-2-phenyl-1,2-dihydronaphthalene (3ed):**

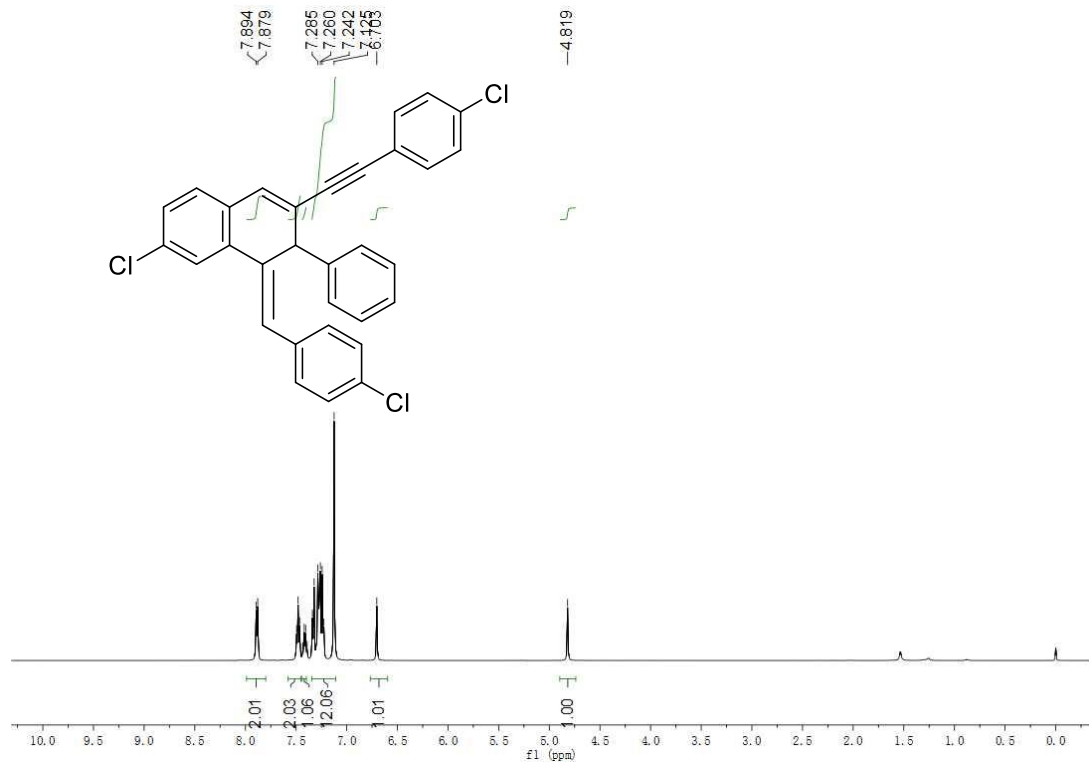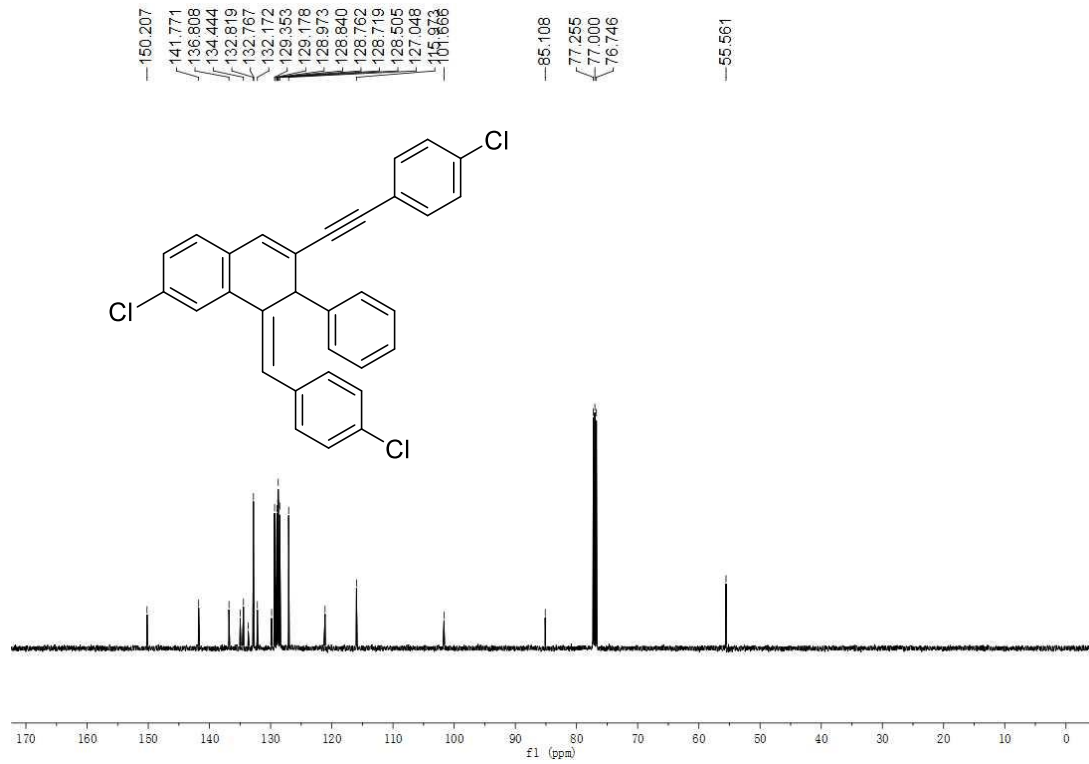

**1-(4-chlorobenzylidene)-3-((4-chlorophenyl)ethynyl)-2-phenyl-7-(trifluoromethyl)-1,2-dihydronaphthalene (3fd):**

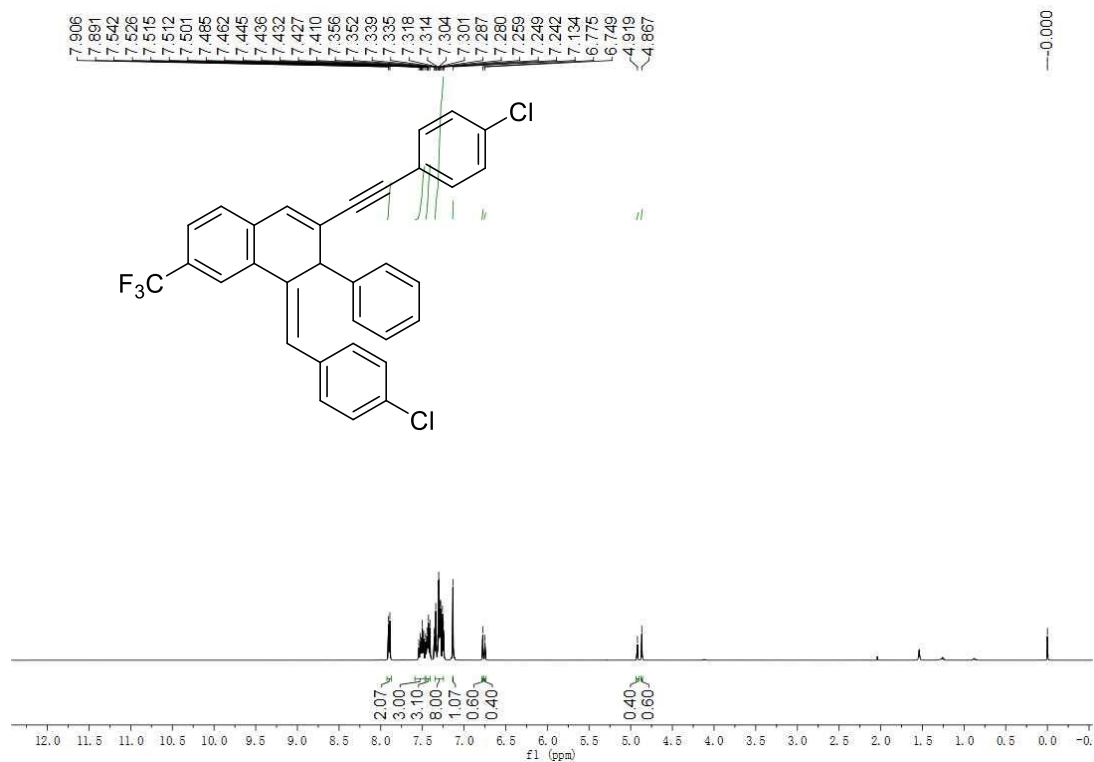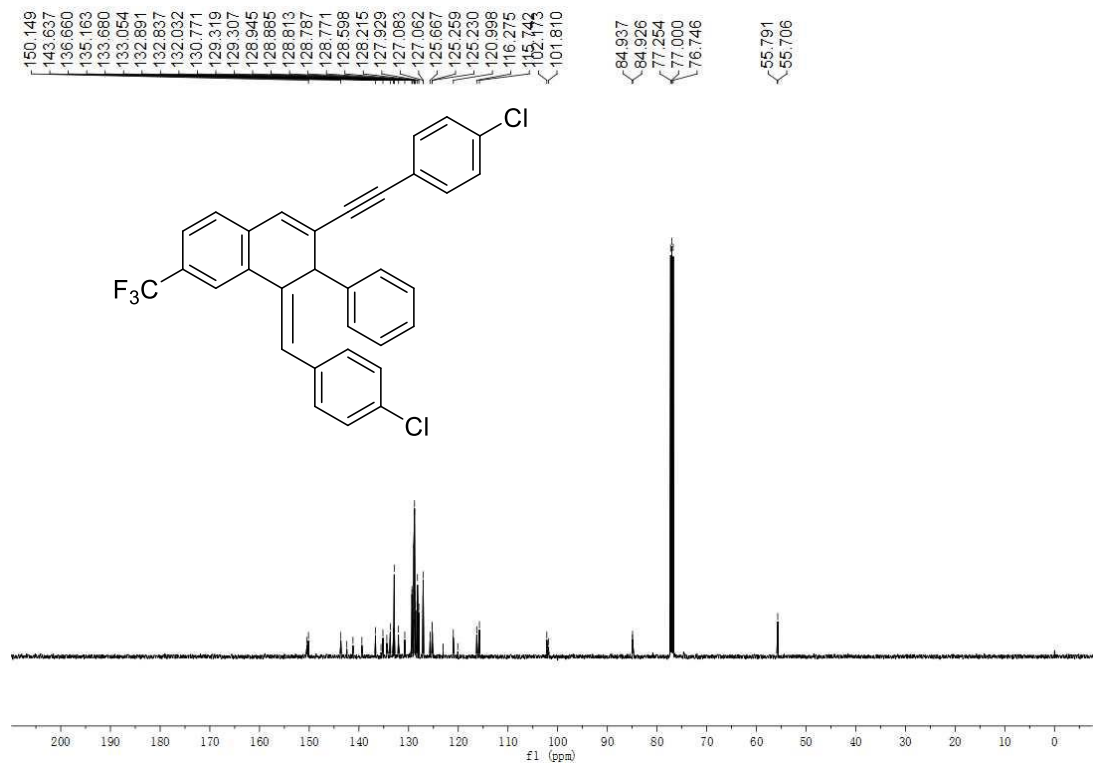

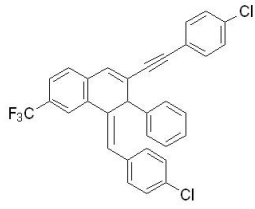

62.353  
62.473

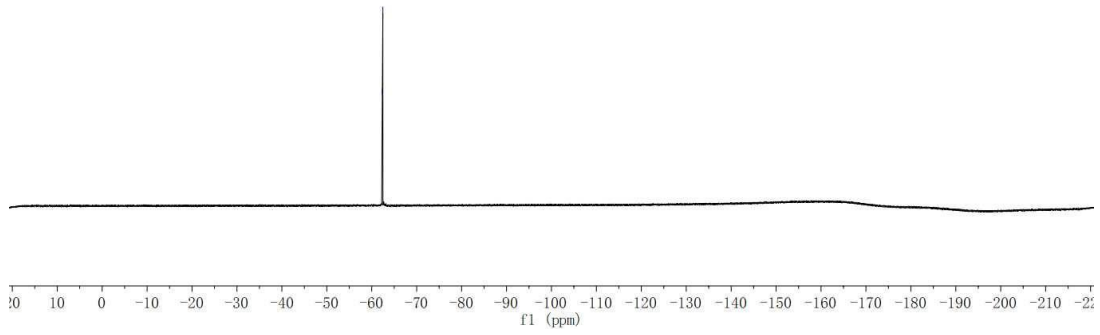

**7-phenyl-6-(thiophen-3-ylethynyl)-8-(thiophen-3-ylmethyl)naphthalen-2-yl(3r,5r,7r)-adamantane-1-carboxylate (3gj):**

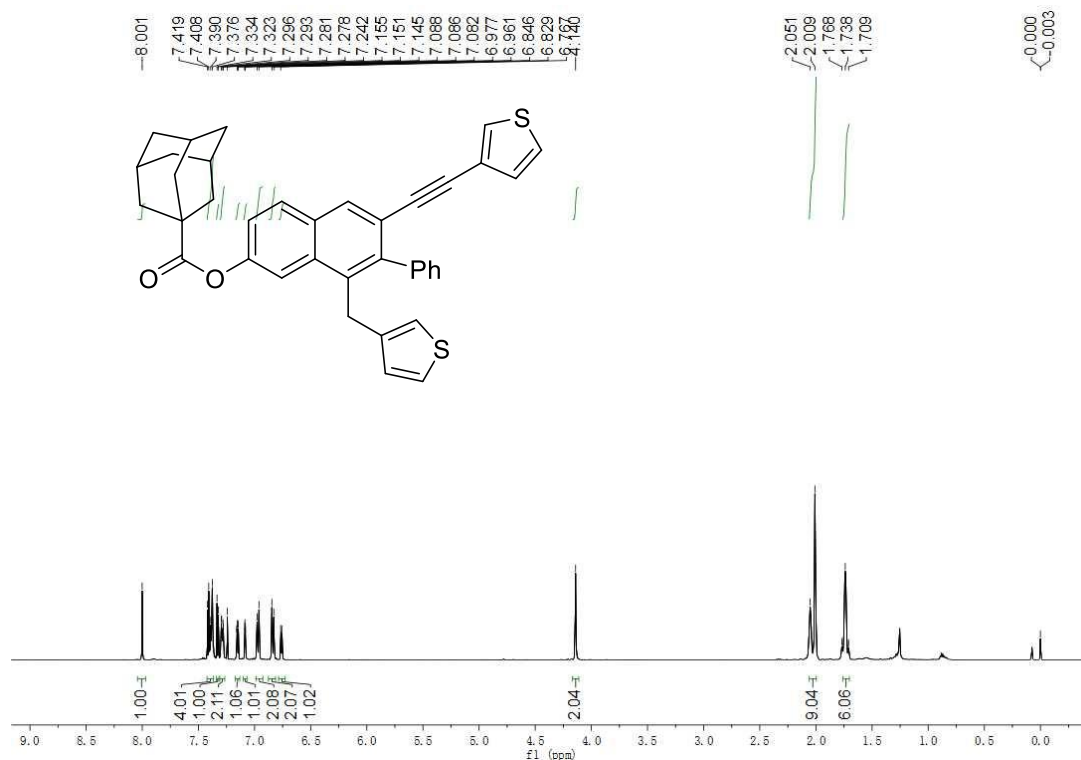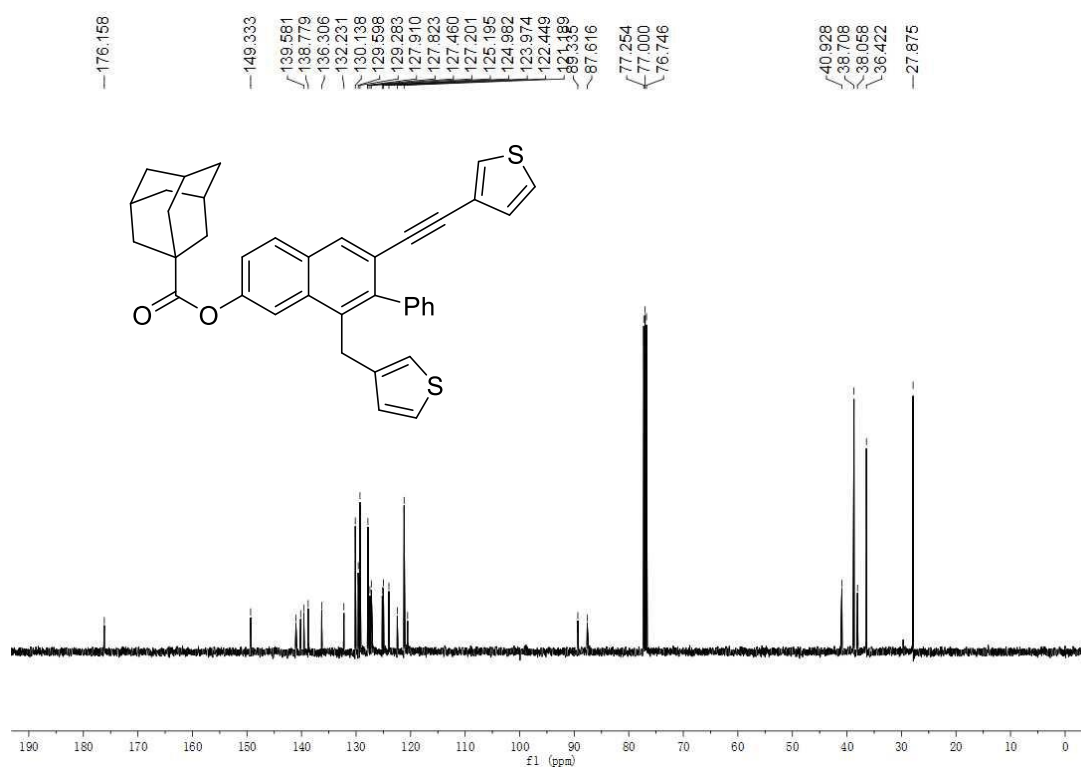

**5-chloro-1-(4-chlorobenzylidene)-3-((4-chlorophenyl)ethynyl)-2-phenyl-1,2-dihydronaphthalene (3hd):**

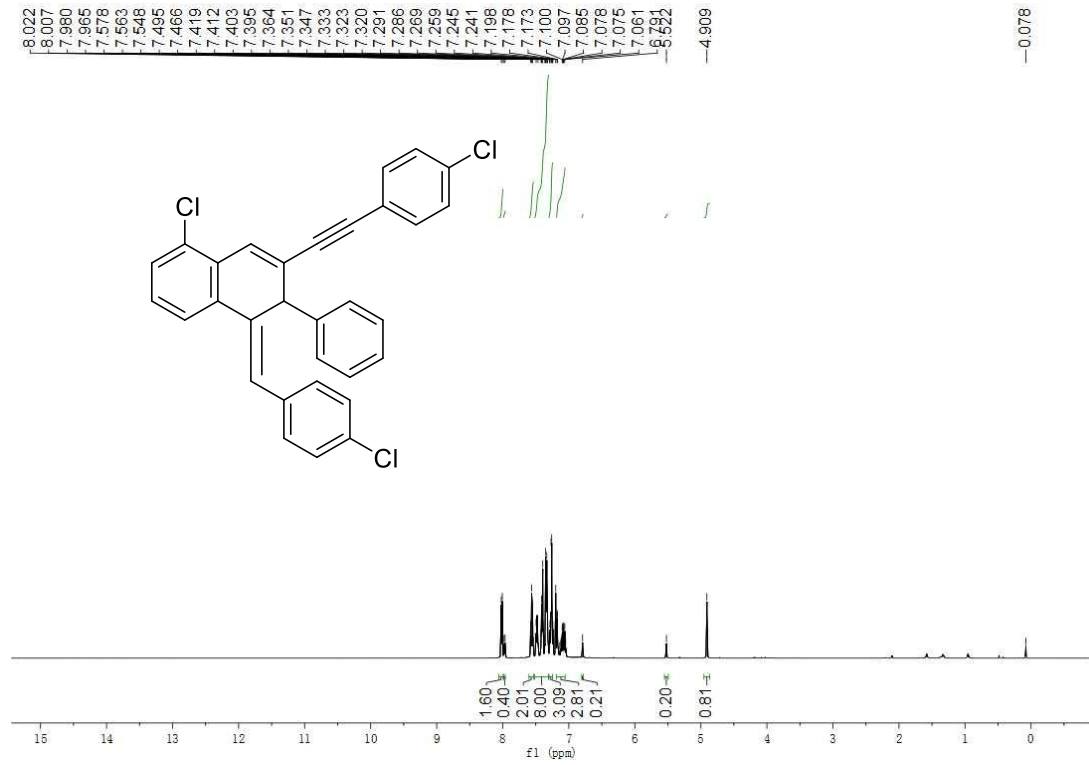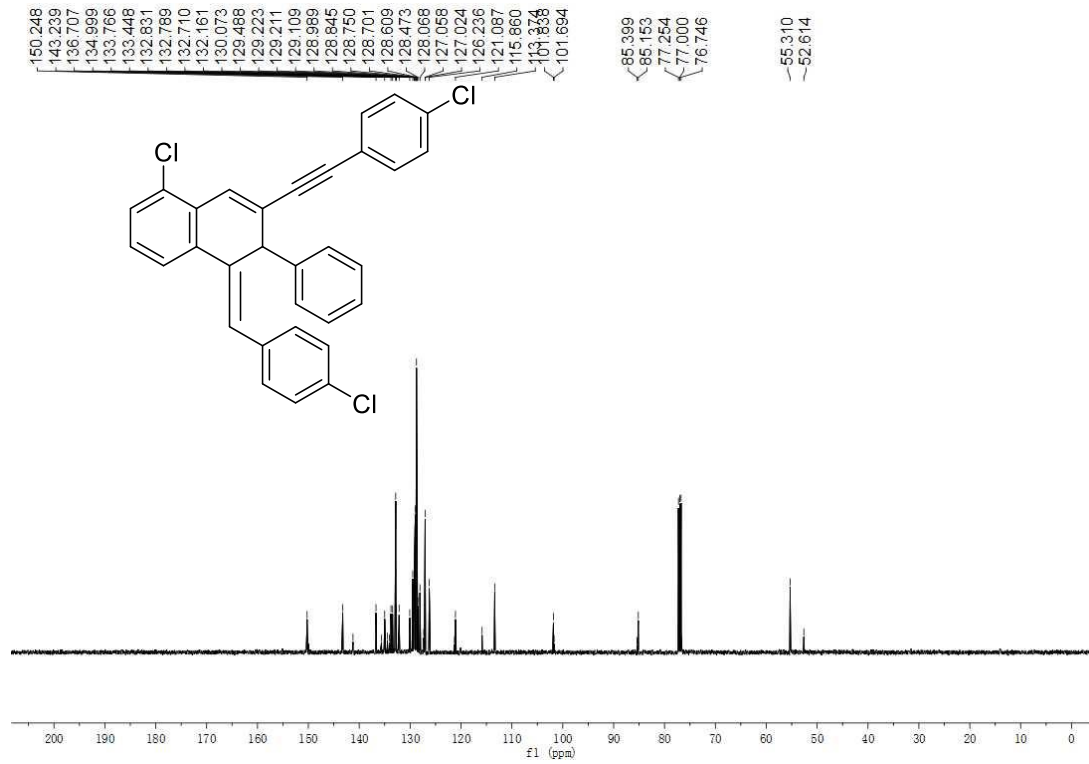



# 1-(4-chlorobenzylidene)-3-((4-chlorophenyl)ethynyl)-2-(p-tolyl)-1,2-dihydronaphthalene

(3id):

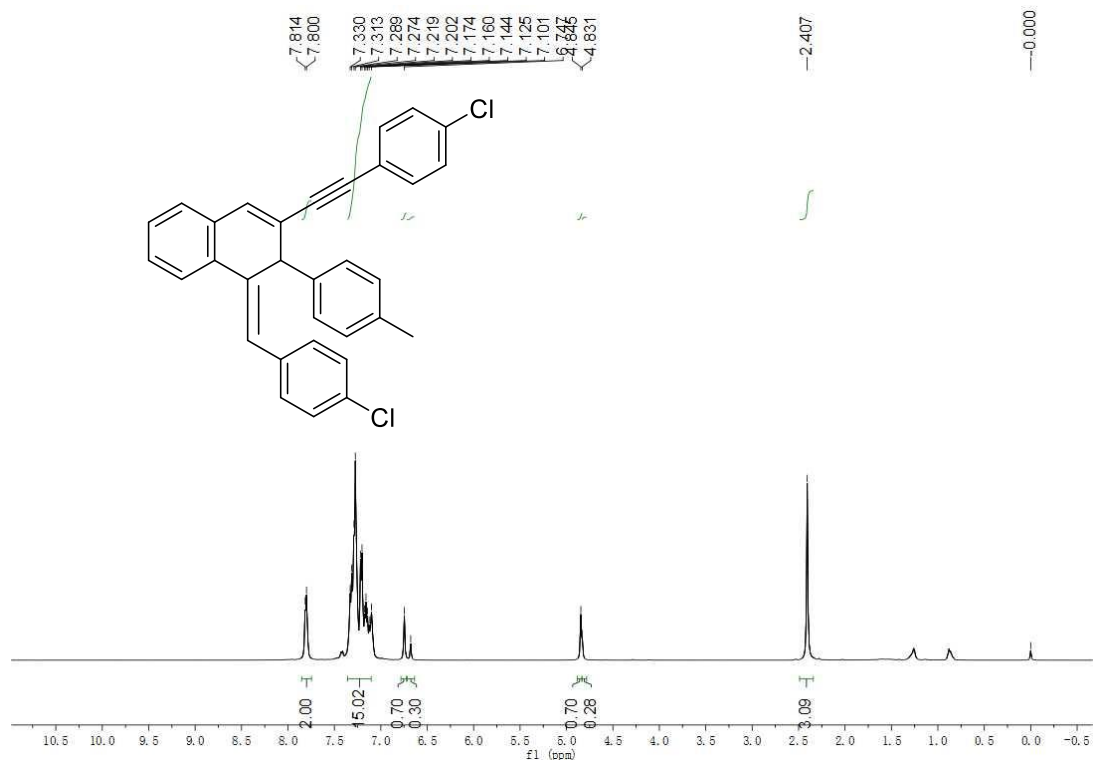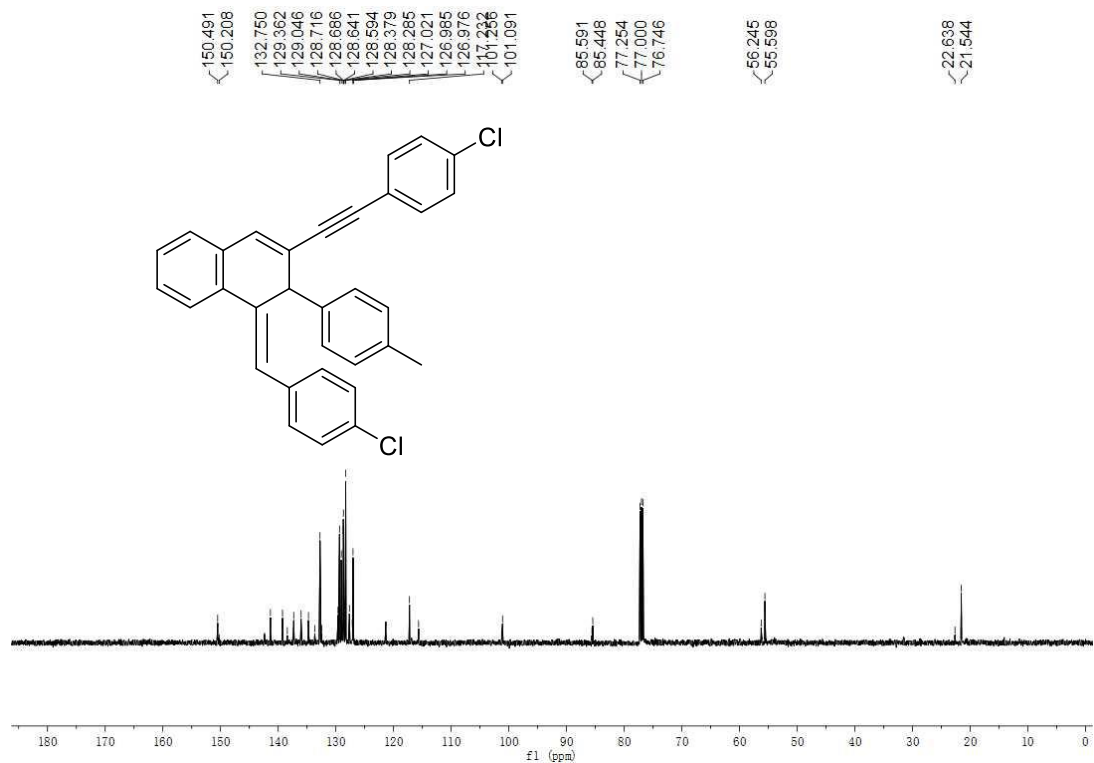

**1-(4-chlorobenzylidene)-3-((4-chlorophenyl)ethynyl)-2-(4-methoxyphenyl)-1,2-dihydronaphthalene (3jd):**

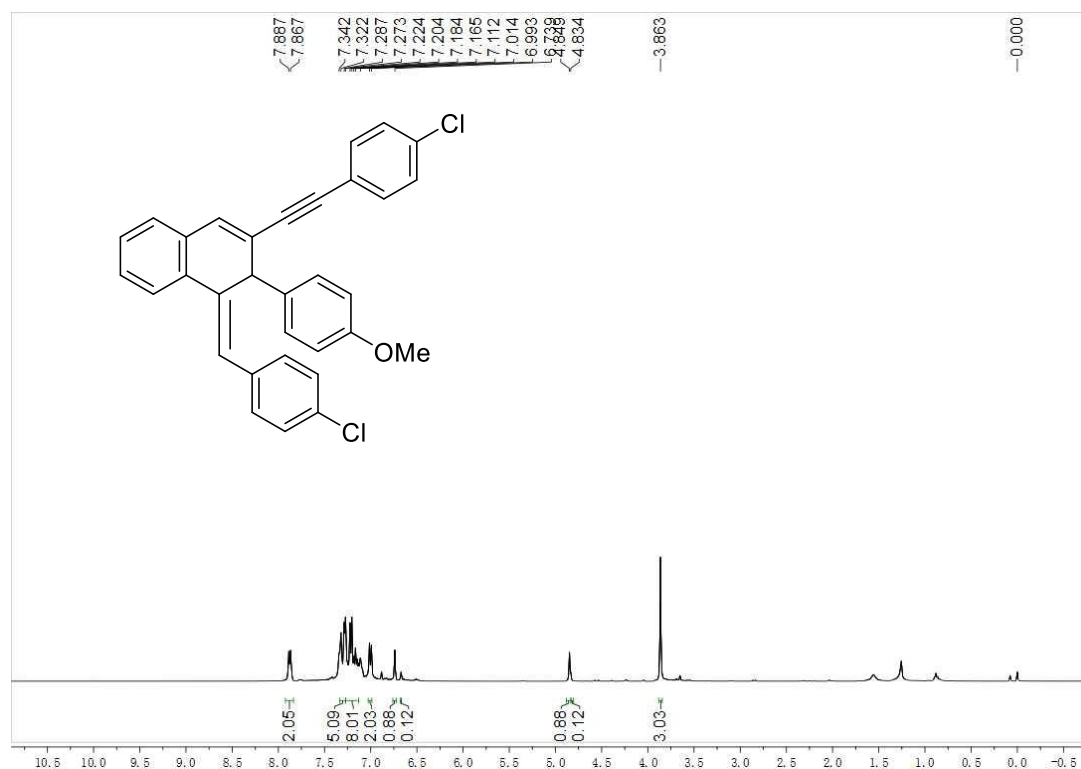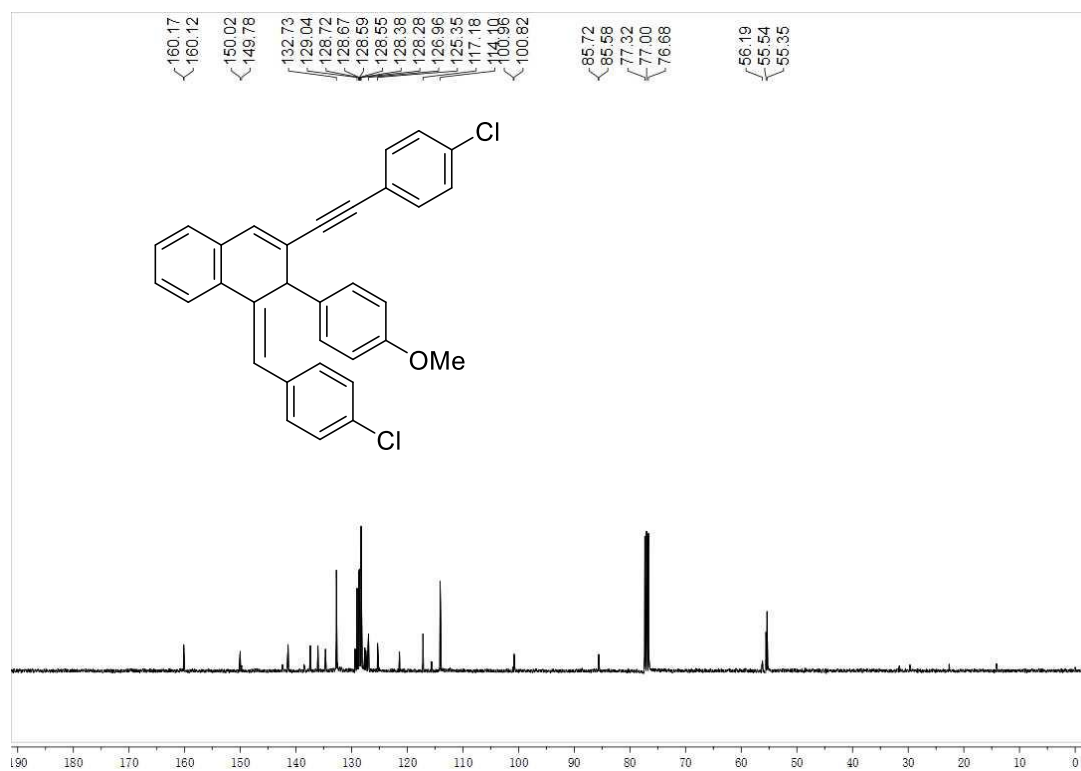

**1-(4-chlorobenzylidene)-3-((4-chlorophenyl)ethynyl)-2-(4-fluorophenyl)-1,2-dihydronaphthalene (3kd):**

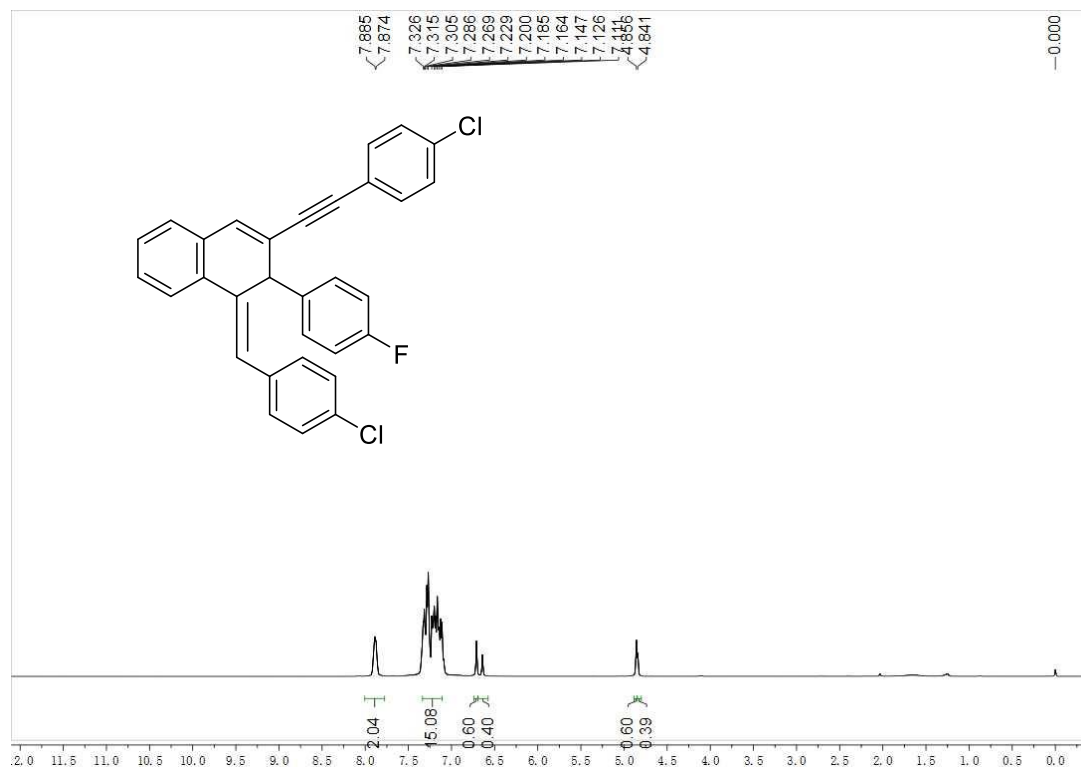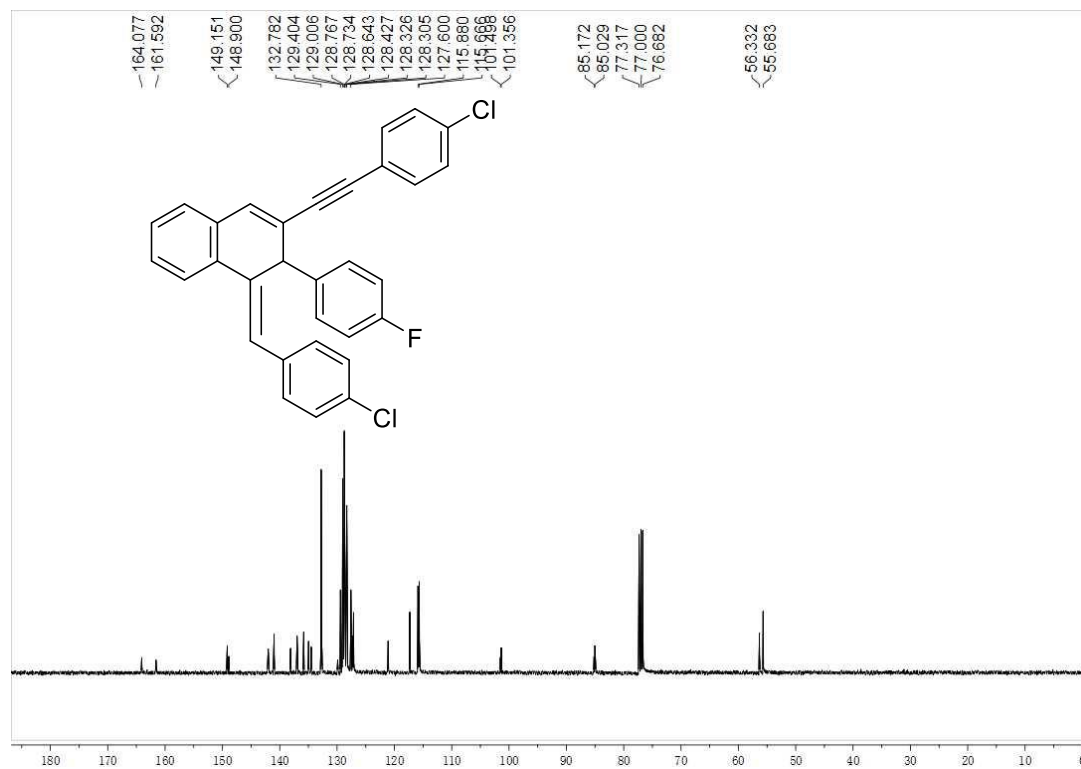

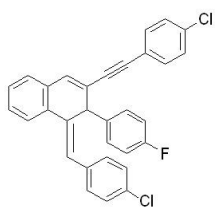

110.371  
110.475

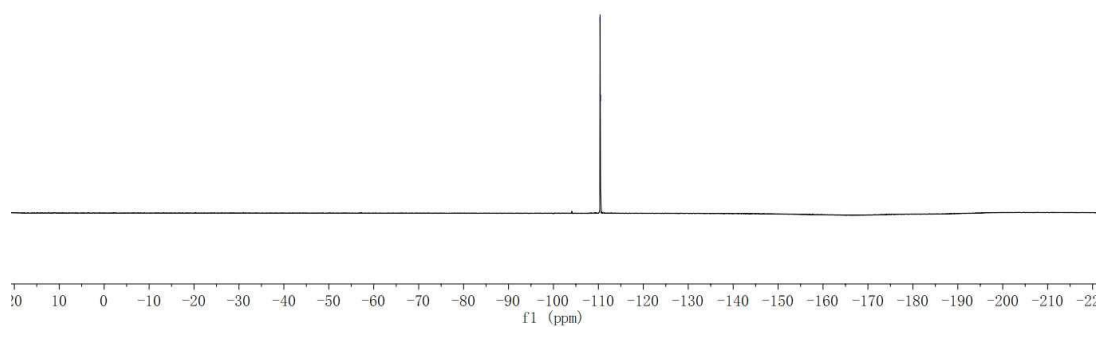

**1-(4-chlorobenzylidene)-2-(4-chlorophenyl)-3-((4-chlorophenyl)ethynyl)-1,2-dihydronaphthalene (3ld):**

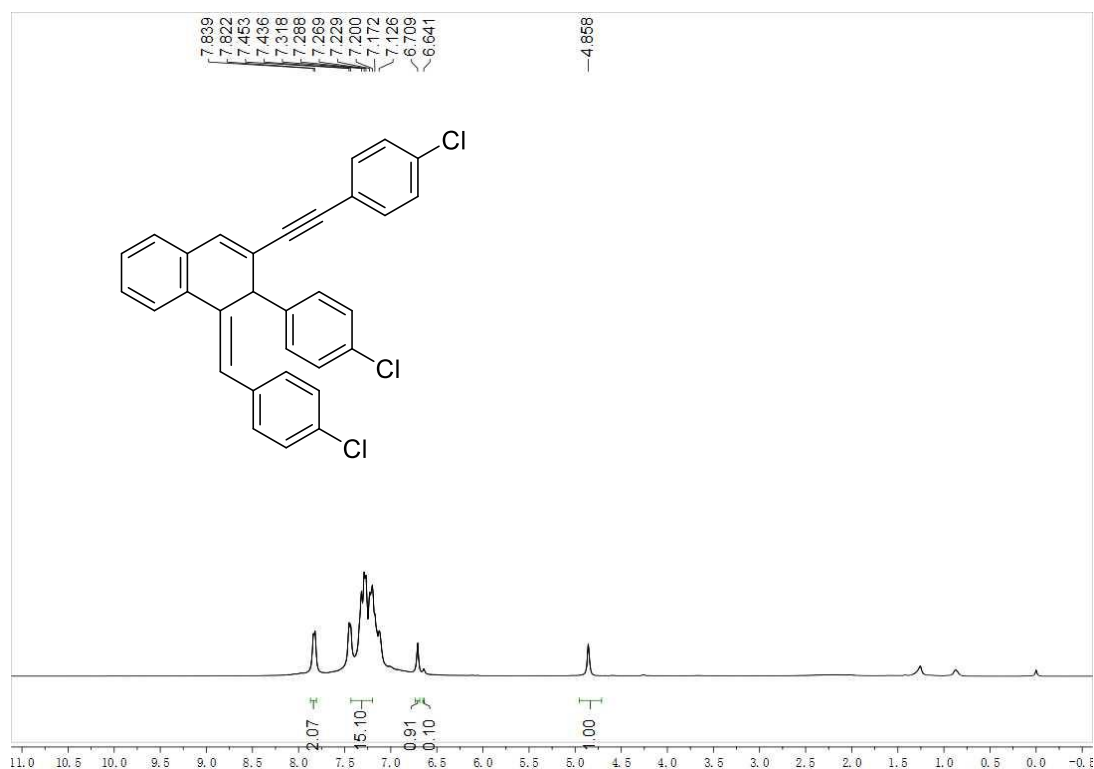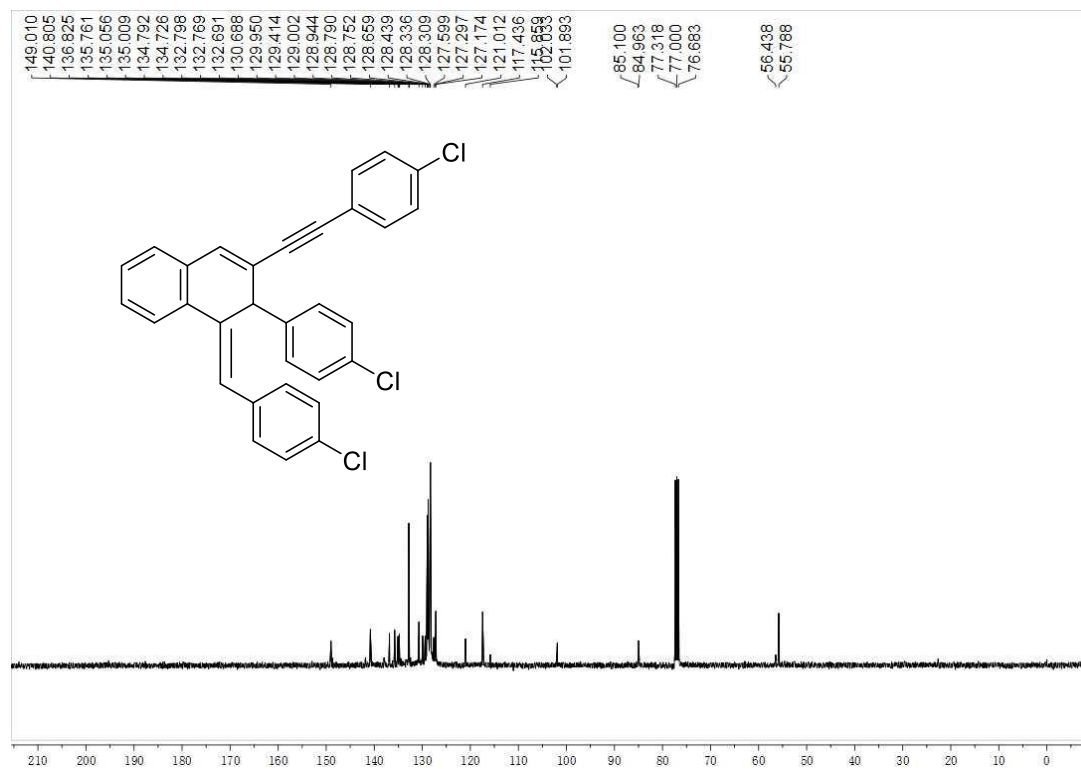

# 1-(4-chlorobenzylidene)-3-((4-chlorophenyl)ethynyl)-2-(m-tolyl)-1,2-dihydronaphthalene

(3md):

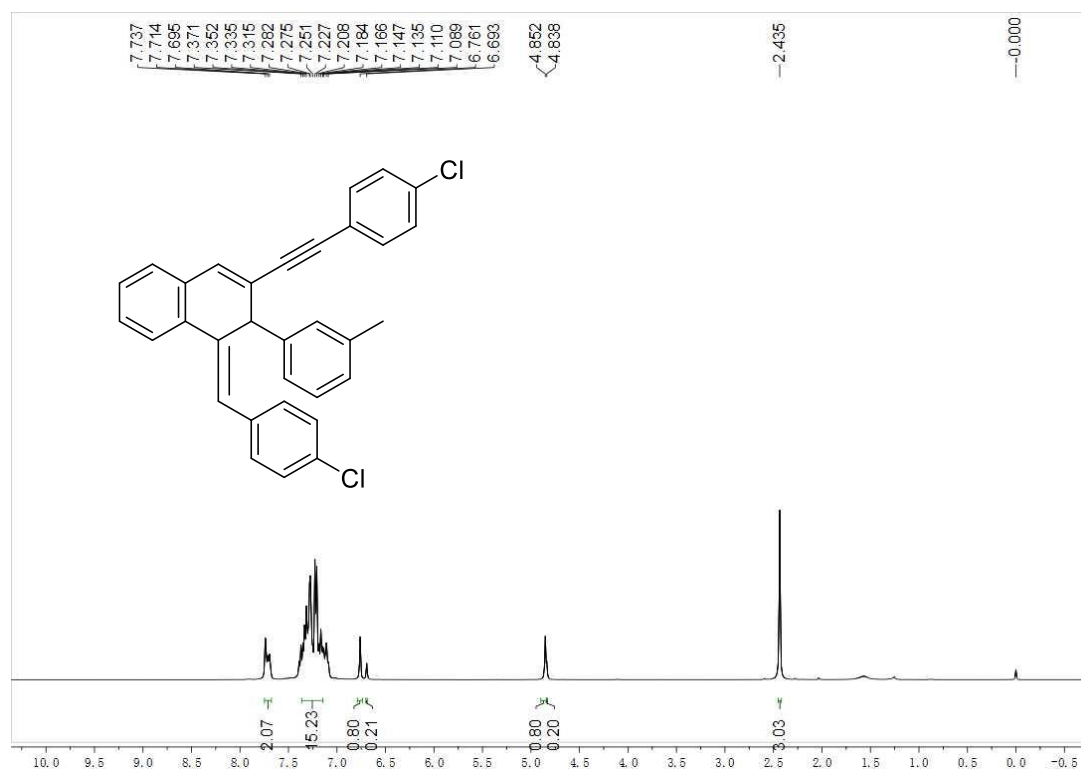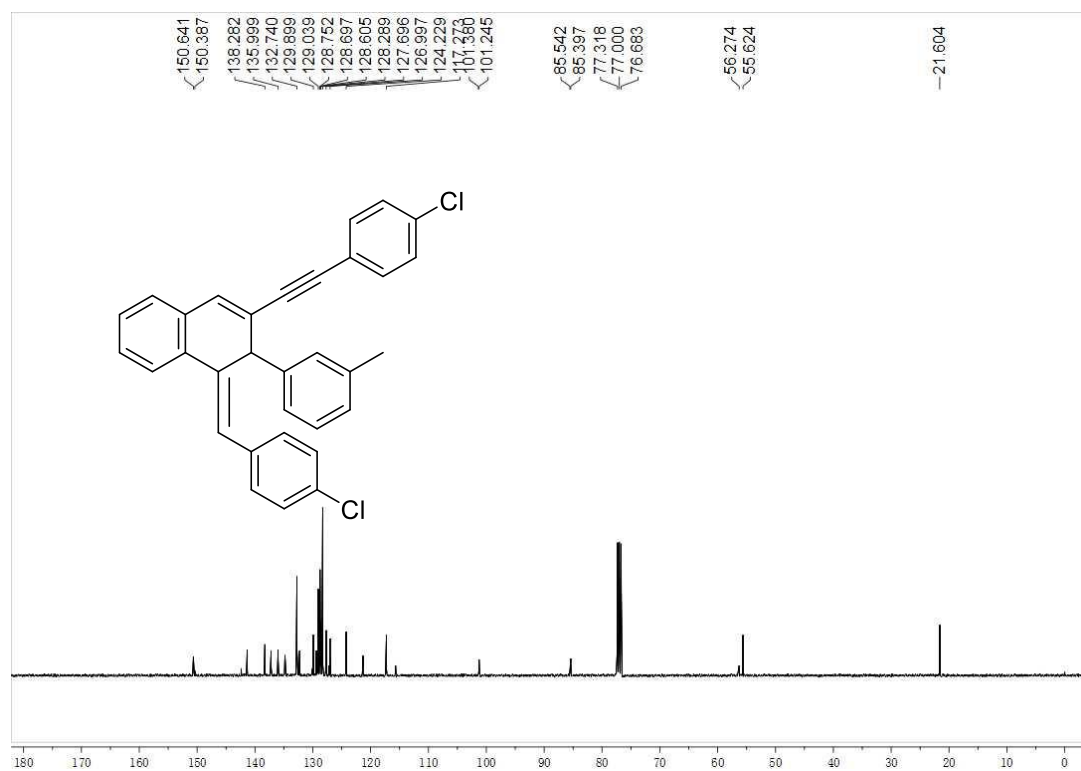

**1-(4-chlorobenzylidene)-2-(3-chlorophenyl)-3-((4-chlorophenyl)ethynyl)-1,2-dihydronaphthalene (3nd):**

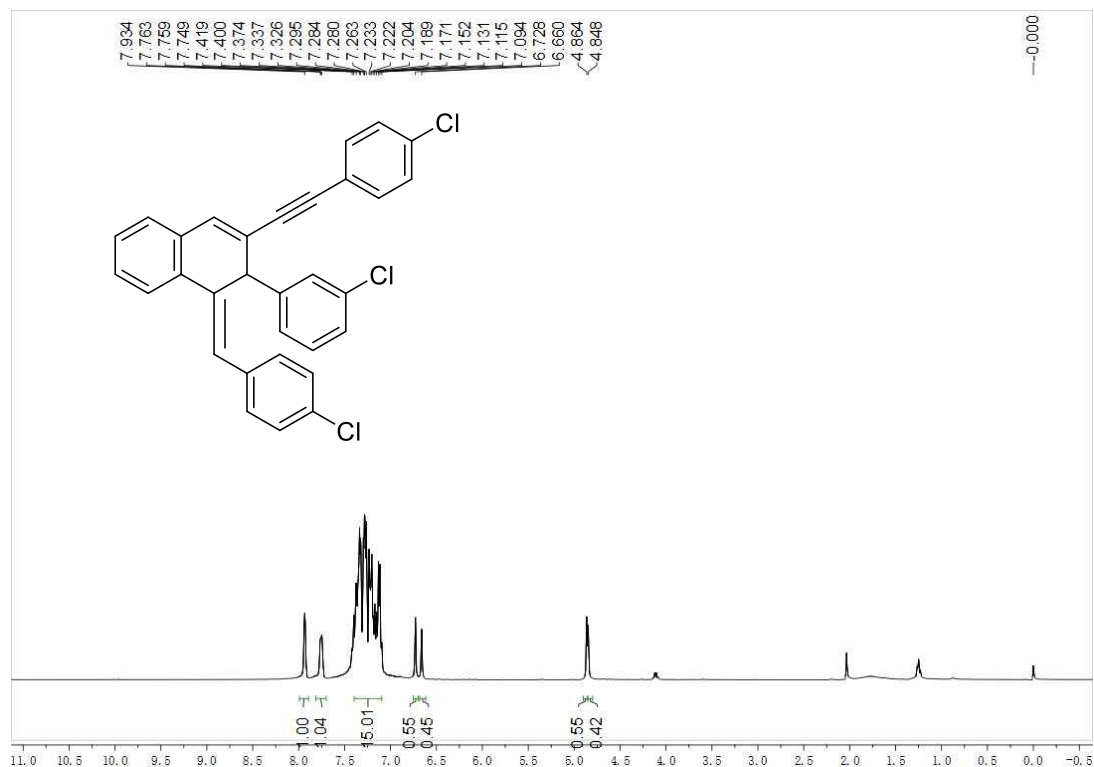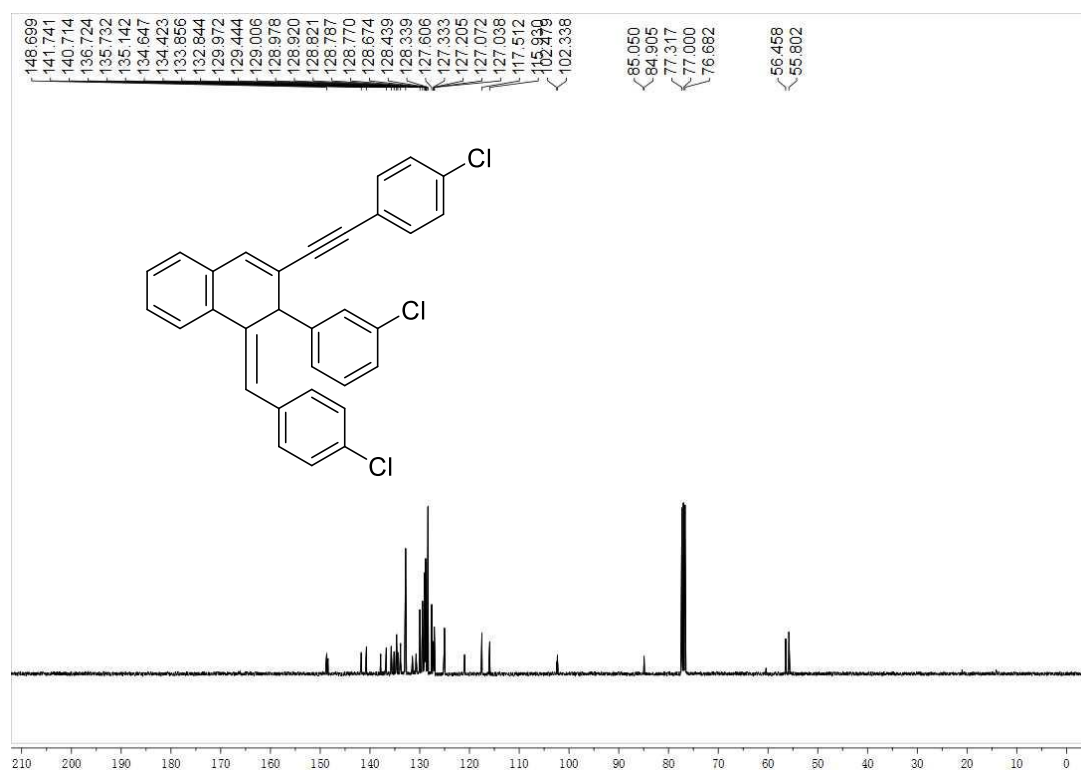

**2-(1-(4-chlorobenzylidene)-3-((4-chlorophenyl)ethynyl)-1,2-dihydronaphthalen-2-yl)thiophene (3od):**

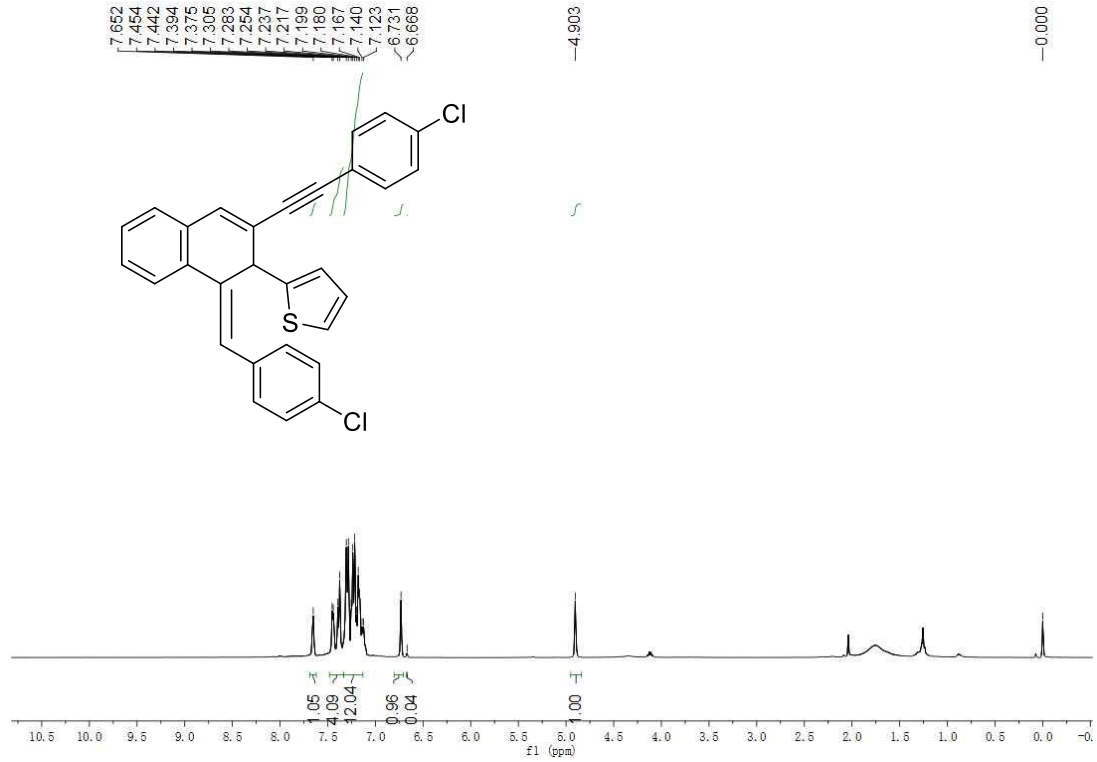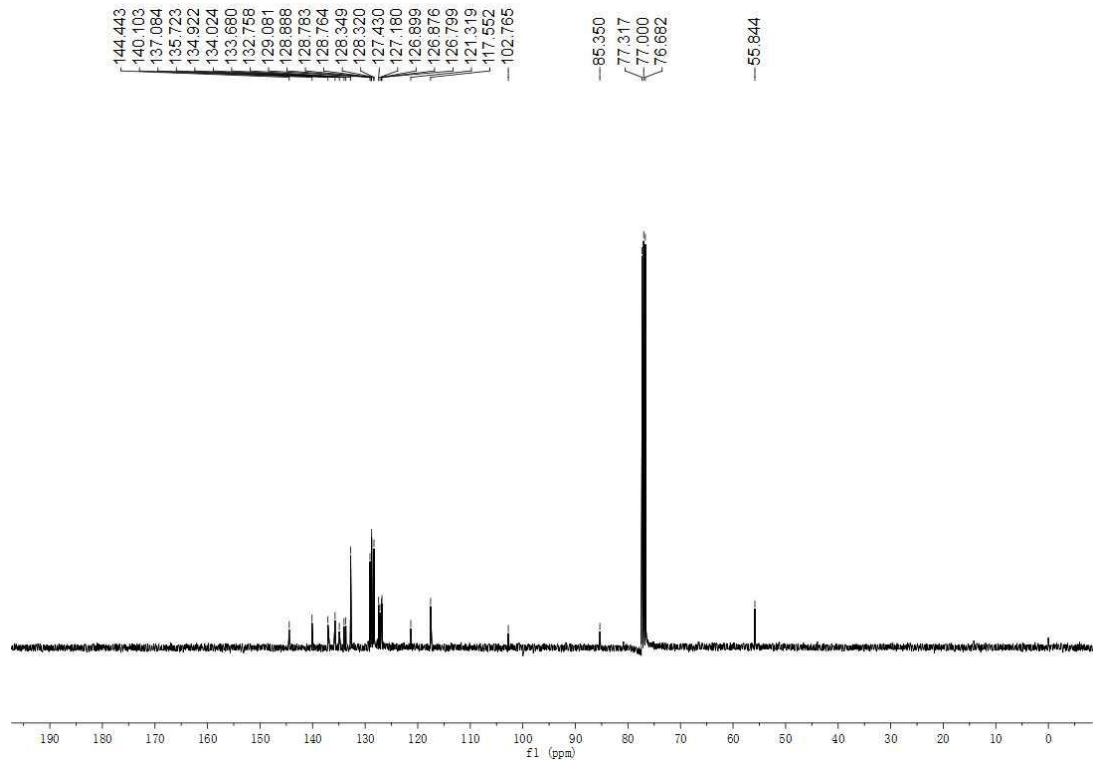



**2,3'-diphenyl-3-(phenylethynyl)-2H-spiro[naphthalene-1,2'-oxirane] (4aa)**

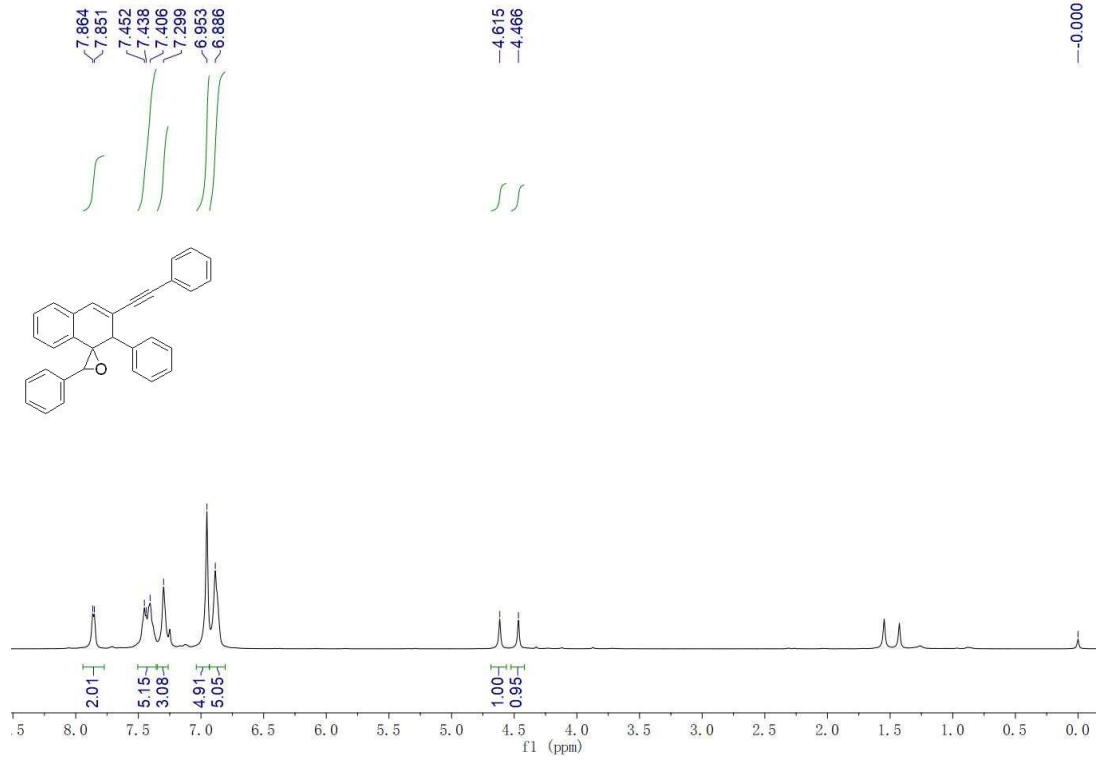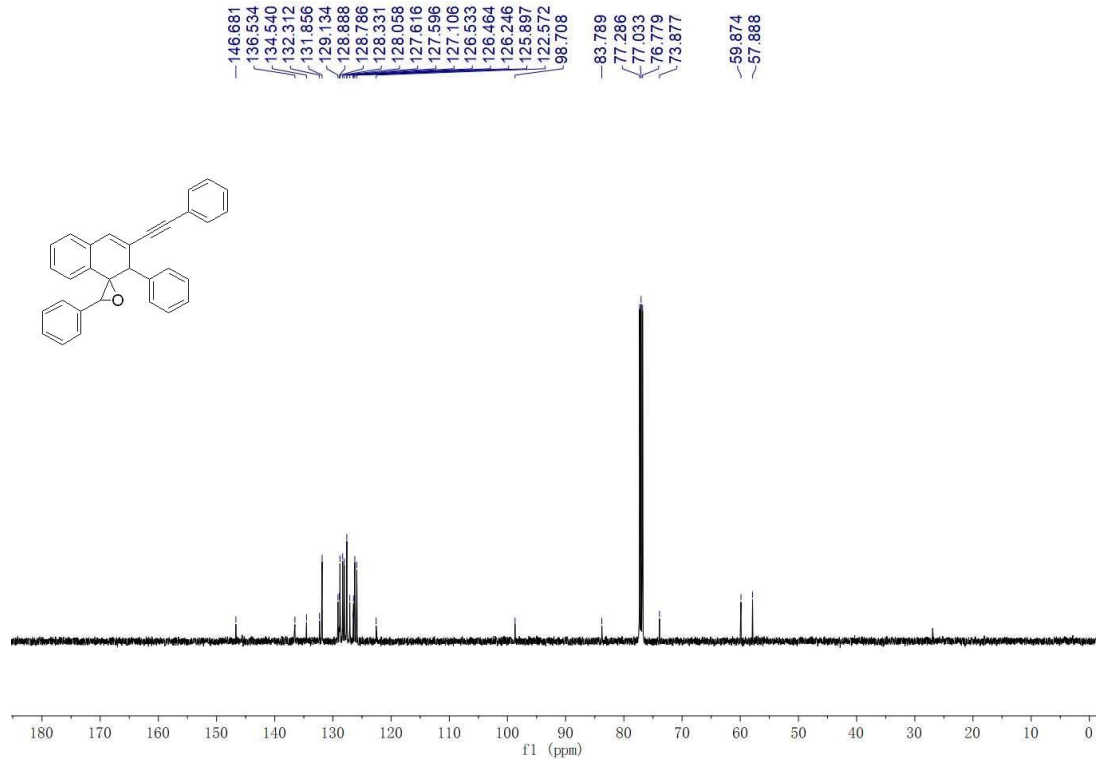

# 1-(4-benzylidene-3-phenyl-3,4-dihydronaphthalen-2-yl)-2-phenylethane-1,2-dione (5aa)

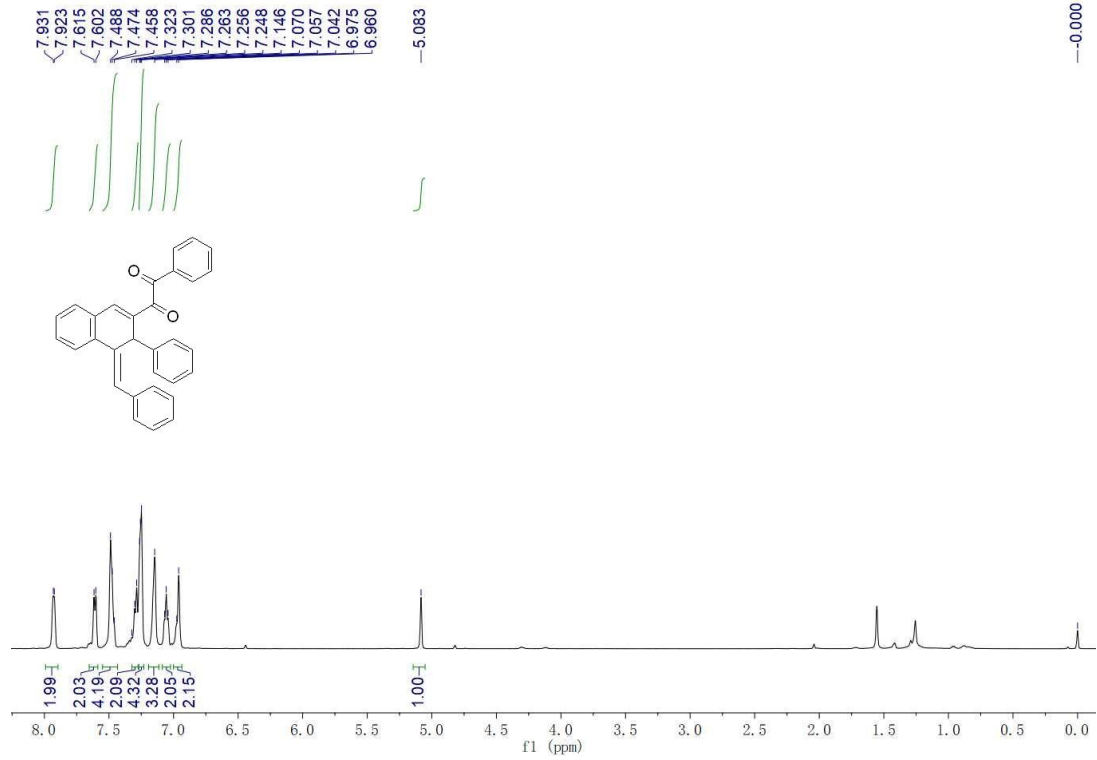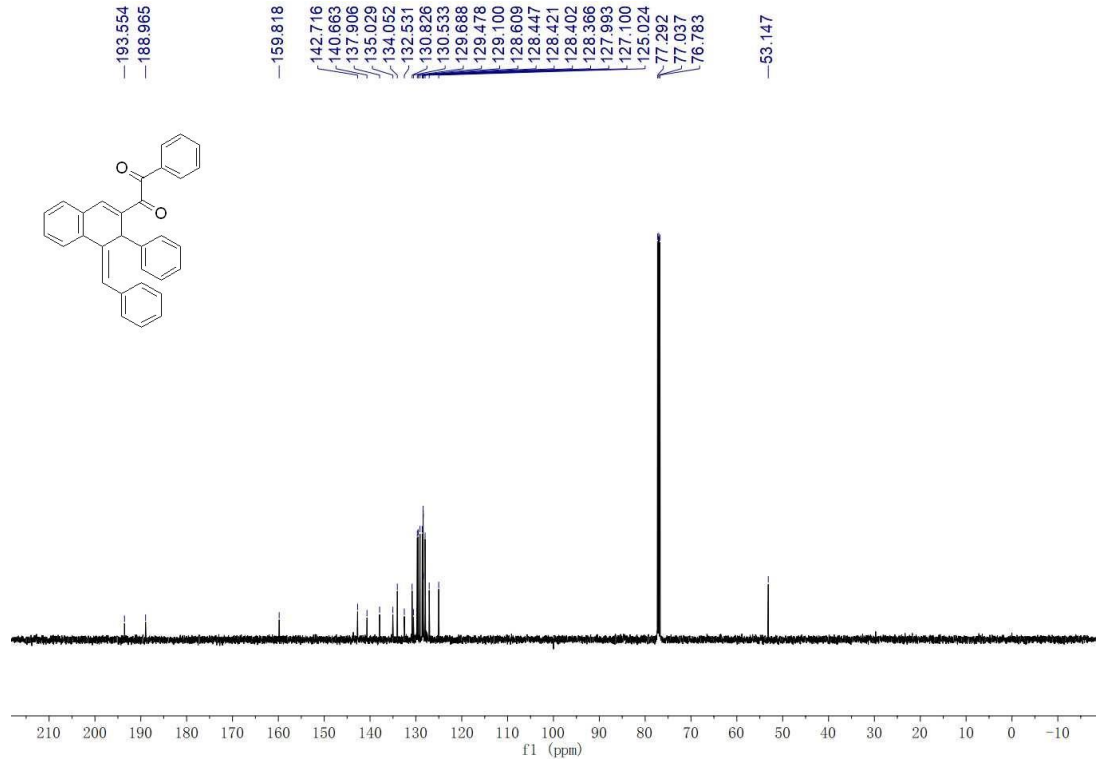

## (D) References

- 1 (a) S.-C. Zhao, X.-Z. Shu, K.-G. Ji, A.-X. Zhou, T. He, X.-Y. Liu and Y.-M. Liang, Pd(0)-Catalyzed [1,5]-Sigmatropic Hydrogen Shift of Propargylic Esters toward Substituent Naphthylamines. *J. Org. Chem.*, 2011, **76**, 1941-1944; (b) M. Yoshida, S. Ohno and K. Namba, Synthesis of Substituted Tetrahydrocyclobuta[b]benzofurans by Palladium-Catalyzed Substitution/[2+2] Cycloaddition of Propargylic Carbonates with 2-Vinylphenols. *Angew. Chem. Int. Ed.*, 2013, **52**, 13597-13600.
